# Supplementary material
Source: publisher figshare collection journal article supplement (https://acs.figshare.com/ndownloader/files/21794706)
Supplement: Supplementary file 1 [file 21794706]

## Supporting information for:

# A catalytic approach towards chiral P,N-chelate complexes utilizing the asymmetric hydrophosphination protocol

Dávid Katona, Yunpeng Lu, Yongxin Li, Sumod A. Pullarkat\*, and Pak-Hing Leung\*

*Division of Chemistry & Biological Chemistry, School of Physical & Mathematical  
Sciences, Nanyang Technological University, Singapore 637371, Singapore*

Email: [sumod@ntu.edu.sg](mailto:sumod@ntu.edu.sg);  
[pakhing@ntu.edu.sg](mailto:pakhing@ntu.edu.sg)

## Table of Contents

|                                                                           |     |
|---------------------------------------------------------------------------|-----|
| 1. General Information .....                                              | S1  |
| 2. Experimental section .....                                             | S2  |
| 3. References .....                                                       | S13 |
| 4. NMR spectra.....                                                       | S14 |
| 5. HPLC chromatograms .....                                               | S33 |
| 6. Coordination study .....                                               | S45 |
| 7. NBO analysis and the XYZ coordinates of the optimized geometries ..... | S53 |
| 8. Crystallographic data.....                                             | S61 |

## 1. General Information

For preparing and handling air-sensitive phosphines and complexes, positive nitrogen and argon flow was used (standard Schlenk-techniques). Solvents were degassed previously for all reactions and measurements when it was necessary. Reagents for carrying out synthetic steps were purchased from Sigma Aldrich, TCI, Strem, Alfa Aesar, Acros Organics. Purifications by flash column chromatography were carried out on Merck Silica Gel 60.

For the NMR data Bruker AV500 ( $^1\text{H}$  500.1 MHz,  $^{13}\text{C}$  125.7 MHz,  $^{19}\text{F}$  470.6 MHz,  $^{31}\text{P}$  202.4 MHz), Bruker AV400 and BBFO 400 ( $^1\text{H}$  400.1 MHz,  $^{13}\text{C}$  100.6 MHz,  $^{19}\text{F}$  376.5 MHz,  $^{31}\text{P}$  162.0 MHz) instruments were used for the characterization of new compounds and the coordination study. Chemical shifts were reported in ppm by using internal standard TMS for  $^1\text{H}$  NMR measurements,  $\text{CDCl}_3$  for  $^{13}\text{C}$  NMR measurements, external standard  $\text{H}_3\text{PO}_4$  for  $^{31}\text{P}$  NMR-measurements and  $\text{CFCl}_3$  for  $^{19}\text{F}$  NMR-measurements. HRMS data was recorded on Waters Q-TOF Premier spectrometer by using ESI positive mode. Elemental Analysis was carried out on PerkinElmer CHNS/O Series II 2400 EA instrument. The determination of ee was performed on Agilent 1200 Series chromatograph with Daicel Chiralpack ID and IF columns in *n*-hexane-isopropanol solvent system. Optical rotation measurements were performed on Jasco P-1030 polarimeter using the D-lines of sodium (589 nm) as light source.

(*R*)-**1**, (*S*)-**2** and (*R,R*)-**7** complexes were prepared as described in literature<sup>1</sup>.

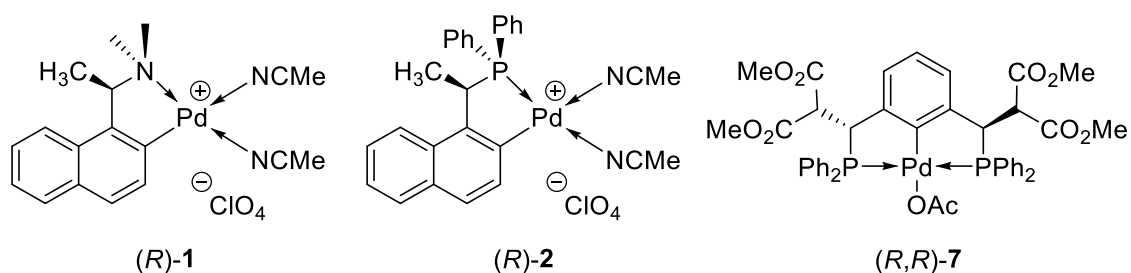

**Caution!** Perchlorate salts of metal complexes are dangerous as being potentially explosive compounds. Those chemicals must be handled with care.

## 2. Experimental section

### Preparation of isoquinoline-1-carbaldehyde (**4**)<sup>2</sup>

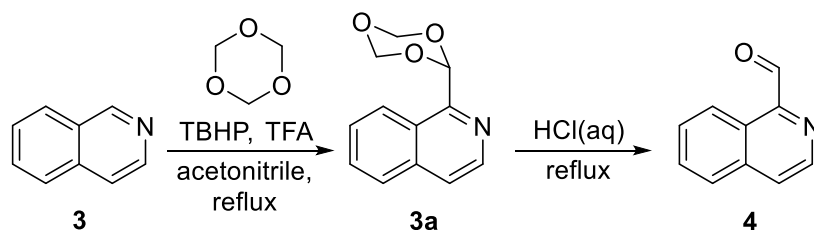

Isoquinoline (5.4 mmol, 0.70 g, 1.0 equiv.) was dissolved in 35 ml acetonitrile, then trioxane (488.6 mmol, 44.01 g, 90.0 equiv.), *tert*-butyl hydroperoxide (11.13 mmol, 1.02 g, 2.1 equiv.), trifluoroacetic acid (5.4 mmol, 0.62 g, 1.0 equiv.) and iron(II)sulfate (0.27 mmol, 0.04 g, 0.05 equiv.) were added and the solution was refluxed overnight. After the reaction was complete (monitored by TLC), volatiles were removed by evaporation, saturated sodium bicarbonate solution was poured on the residue and extracted with diethyl ether. The organic layer was then washed with brine, dried and evaporated.

The isolated crude acetal was refluxed at 110 °C in 20 m/m% HCl solution for one hour and neutralized at 0 °C with sodium carbonate. The aqueous solution was extracted with dichloromethane, the organic layer was washed with brine, dried and evaporated. The obtained

crude material was purified with flash column chromatography on silica gel (*n*-hexane/ethyl acetate 2:1 to 1:1) to collect the pure product.

**4** red-brown solid. Yield: 49%.

**<sup>1</sup>H NMR** (500 MHz, CDCl<sub>3</sub>) δ 10.40 (s, 1H, CHO), 9.32 (dd, <sup>3</sup>J<sub>HH</sub> = 8.4, 4.3 Hz, 1H, ArH), 8.76 (d, <sup>3</sup>J<sub>HH</sub> = 5.5 Hz, 1H, ArH), 7.97 – 7.84 (m, 2H, ArH), 7.83 – 7.75 (m, 2H, ArH); **<sup>13</sup>C NMR** (126 MHz, CDCl<sub>3</sub>) δ 195.68 (s, 1C, CHO), 149.85 (s), 142.47 (s), 136.91 (s), 130.79 (s), 130.06 (s), 126.96 (s), 126.36 (s), 125.75 (s), 125.52 (s). **HRMS** (+ESI) *m/z*: (M + H)<sup>+</sup> calc'd for C<sub>10</sub>H<sub>8</sub>NO, 158.0606; found, 158.0608. **Anal.** Calc'd for C<sub>10</sub>H<sub>7</sub>NO: C, 76.42; H, 4.49; N, 8.91. Found: C, 75.76; H, 4.77; N, 8.73%.

### Preparation of dimethyl 2-(isoquinolin-1-ylmethylene)malonate (**5a**)<sup>3</sup>

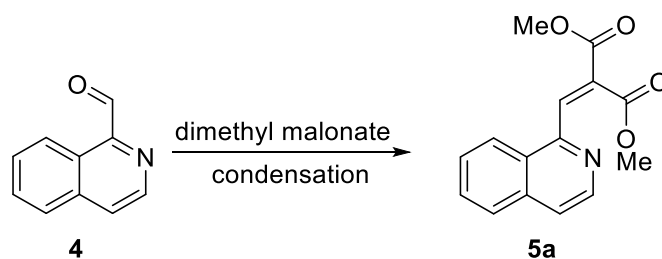

**4** carbadehyde (5.60 mmol, 0.89 g, 1.0 equiv.) and dimethyl malonate (6.52 mmol, 0.86 g, 1.15 equiv.) were dissolved in 40.0 ml benzene and heated to reflux temperature. *N*-methyl piperidine (0.85 mmol, 0.08 g, 0.15 equiv.) and benzoic acid (0.42 mmol, 0.05 g, 0.075 equiv.) were dissolved in 10.0 ml benzene and added to the boiling solution of the starting material and the malonate. The solution was refluxed overnight with the use of Dean-Stark apparatus and 4 Å molecular sieve. After the reaction was complete, saturated aqueous sodium bicarbonate was added to the solution and extracted with DCM. The combined organic layer was washed with brine, dried and evaporated. The residue was purified with column chromatography on silica gel (*n*-hexane/ethyl acetate 4:1 to 2:1) to afford the pure diester.

**5a** yellow-brown solid. Yield: 52%.

**<sup>1</sup>H NMR** (500 MHz, CDCl<sub>3</sub>) δ 8.57 (s, 1H, ArH), 8.55 (d, <sup>3</sup>J<sub>H-H</sub> = 5.5 Hz, 1H, ArH), 8.31 (d, <sup>3</sup>J<sub>H-H</sub> = 8.4 Hz, 1H, ArH), 7.87 (d, <sup>3</sup>J<sub>H-H</sub> = 8.0 Hz, 1H, C=CHAr), 7.78 – 7.60 (m, 3H, ArH), 3.92 (s, 3H, COOCH<sub>3</sub>), 3.90 (s, 3H, COOCH<sub>3</sub>); **<sup>13</sup>C NMR** (126 MHz, CDCl<sub>3</sub>) δ 167.22 (s, 1C, C=O), 164.43 (s, 1C, C=O), 150.11 (s, 1C, N=C-CH), 142.40 (s), 136.54 (s), 136.11 (s), 130.39 (s), 130.30 (s), 128.23 (s), 127.78 (s), 127.53 (s), 123.89 (s), 122.49 (s), 52.92 (s, 1C, COOCH<sub>3</sub>), 52.45 (s, 1C, COOCH<sub>3</sub>). **HRMS** (+ESI) *m/z*: (M + H)<sup>+</sup> calc'd for C<sub>15</sub>H<sub>14</sub>NO<sub>4</sub>, 272.0923; found, 272.0923. **Anal.** Calc'd for C<sub>15</sub>H<sub>13</sub>NO<sub>4</sub>: C, 66.41; H, 4.83; N, 5.16. Found: C, 66.15; H, 4.15; N, 5.16%.

**General procedure for the preparation of diethyl, diisopropyl and dibenzyl 2-(isoquinolin-1-ylmethylene)malonates (**5b**, **5c**, **5d**)<sup>4</sup>**

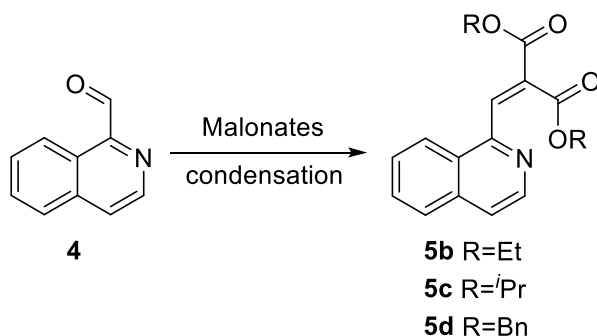

TiCl<sub>4</sub> (2.0 mmol, 2.1 equiv.) was dissolved in 1.5 ml CCl<sub>4</sub> and this solution was added dropwise to 12 ml THF at 0 °C. Upon the yellow adduct appeared, **4** carbaldehyde (0.95 mmol, 1.0 equiv.) and the corresponding malonate (0.95 mmol, 1.0 equiv.) were dissolved in 2.0 ml THF and added to the TiCl<sub>4</sub> solution dropwise. THF solution of pyridine (16.0 mmol, 16.6 equiv.) was also added to the reaction mixture, which then was stirred under nitrogen at 0 °C for 1 hour and further at rt until the reaction was complete. Upon completion the reaction mixture was quenched with 10.0 ml H<sub>2</sub>O, then 20.0 ml ethyl acetate and Na<sub>2</sub>CO<sub>3</sub>(aq.) were added (to adjust the pH to neutral), and the solution was extracted with ethyl acetate. The organic layer was further washed with NaHCO<sub>3</sub> and brine, then dried and evaporated. The resulting diester was purified with column chromatography on silica gel (*n*-hexane/ethyl acetate 5:1 to 1:1) to obtain the pure product.

**Diethyl 2-(isoquinolin-1-ylmethylene)malonate (**5b**)**

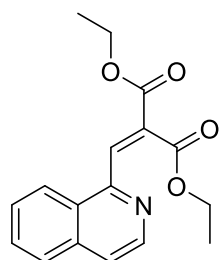

**5b** is a brown oil. Yield: 29%.

<sup>1</sup>H NMR (500 MHz, CDCl<sub>3</sub>) δ 8.53 (d, <sup>3</sup>J<sub>H-H</sub> = 5.6 Hz, 1H, ArH), 8.52 (s, 1H, ArH), 8.28 (d, <sup>3</sup>J<sub>H-H</sub> = 8.5 Hz, 1H, ArH), 7.85 (d, <sup>3</sup>J<sub>H-H</sub> = 8.0 Hz, 1H, C=CHAr), 7.74 – 7.62 (m, 3H, ArH), 4.39 (q, <sup>3</sup>J<sub>H-H</sub> = 7.2 Hz, 2H, OCH<sub>2</sub>CH<sub>3</sub>), 4.37 (q, <sup>3</sup>J<sub>H-H</sub> = 7.2 Hz, 2H, OCH<sub>2</sub>CH<sub>3</sub>), 4.22 (q, <sup>3</sup>J<sub>H-H</sub> = 7.15 Hz, 1H), 1.38 (t, <sup>3</sup>J<sub>H-H</sub> = 7.2 Hz, 3H, OCH<sub>2</sub>CH<sub>3</sub>), 1.31 (t, <sup>3</sup>J<sub>H-H</sub> = 7.15 Hz, 3H, OCH<sub>2</sub>CH<sub>3</sub>), 1.24 (t, <sup>3</sup>J<sub>H-H</sub> = 7.1 Hz, 1H). <sup>13</sup>C NMR (126 MHz, CDCl<sub>3</sub>) δ 166.57 (1C, C=O), 164.05 (1C, C=O), 150.44 (1C, N=C-CH), 142.21 (s), 136.47 (s), 135.52 (s), 131.17 (s), 130.32 (s), 128.12 (s), 127.68 (s), 127.48 (s), 123.99 (s), 122.29 (s), 61.90 (1C, COOCH<sub>2</sub>CH<sub>3</sub>), 61.34 (1C, COOCH<sub>2</sub>CH<sub>3</sub>), 14.16 (1C, COOCH<sub>2</sub>CH<sub>3</sub>), 14.03 (1C, COOCH<sub>2</sub>CH<sub>3</sub>). HRMS (+ESI) m/z: (M + H)<sup>+</sup> calc'd for C<sub>17</sub>H<sub>18</sub>NO<sub>4</sub>, 300.1236; found, 300.1236.

### Diisopropyl 2-(isoquinolin-1-ylmethylene)malonate (5c)

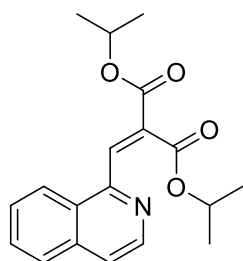

**5c** is a brown oil. Yield: 38%

**<sup>1</sup>H NMR** (400 MHz, CDCl<sub>3</sub>) δ 8.52 (d, <sup>3</sup>J<sub>H-H</sub> = 5.6 Hz, 1H, ArH), 8.47 (s, 1H, ArH), 8.29 (d, <sup>3</sup>J<sub>H-H</sub> = 8.5 Hz, 1H, ArH), 7.85 (d, <sup>3</sup>J<sub>H-H</sub> = 7.6 Hz, 1H, ArH), 7.76 – 7.63 (m, 3H, ArH), 5.32 (hept, <sup>3</sup>J<sub>H-H</sub> = 6.3 Hz, 1H, COOCH(CH<sub>3</sub>)<sub>2</sub>), 5.22 (hept, <sup>3</sup>J<sub>H-H</sub> = 6.2 Hz, 1H, COOCH(CH<sub>3</sub>)<sub>2</sub>), 1.36 (d, <sup>3</sup>J<sub>H-H</sub> = 6.3 Hz, 6H, COOCH(CH<sub>3</sub>)<sub>2</sub>), 1.32 (d, <sup>3</sup>J<sub>H-H</sub> = 6.2 Hz, 6H, COOCH(CH<sub>3</sub>)<sub>2</sub>), 1.28 – 1.20 (m, 1H), 1.16 (d, <sup>3</sup>J<sub>H-H</sub> = 6.3 Hz). **<sup>13</sup>C NMR** (126 MHz, CDCl<sub>3</sub>) δ 166.00 (s, 1C, C=O), 163.60 (s, 1C, C=O), 150.66 (s, 1C, N=C-CH), 142.05 (s), 136.44 (s), 134.92 (s), 131.97 (s), 130.27 (s), 128.04 (s), 127.63 (s), 127.45 (s), 124.09 (s), 122.16 (s), 69.59 (s), 69.54 (s, 1C, COOCH(CH<sub>3</sub>)<sub>2</sub>), 68.77 (s), 68.69 (s, 1C, COOCH(CH<sub>3</sub>)<sub>2</sub>), 21.78 (s, 2C, COOCH(CH<sub>3</sub>)<sub>2</sub>), 21.61 (s, 2C, COOCH(CH<sub>3</sub>)<sub>2</sub>). **HRMS** (+ESI) m/z: (M + H)<sup>+</sup> calc'd for C<sub>19</sub>H<sub>22</sub>NO<sub>4</sub>, 328.1549; found, 328.1548.

### Dibenzyl 2-(isoquinolin-1-ylmethylene)malonate (5d)

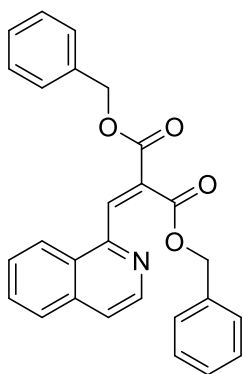

**5d** is a brown solid. Yield: 22%

**<sup>1</sup>H NMR** (500 MHz, CDCl<sub>3</sub>) δ 8.57 (s, 1H, ArH), 8.33 (d, <sup>3</sup>J<sub>H-H</sub> = 5.5 Hz, 1H, ArH), 8.26 (d, <sup>3</sup>J<sub>H-H</sub> = 8.4 Hz, 1H, ArH), 7.84 (d, <sup>3</sup>J<sub>H-H</sub> = 8.1 Hz, 1H, C=CHAr), 7.74 – 7.58 (m, 3H, ArH), 7.42 – 7.33 (m, 5H, ArH), 7.33 – 7.26 (m, 6H, ArH), 5.35 (s, 2H, benzyl CH<sub>2</sub>), 5.34 (s, 2H, benzyl CH<sub>2</sub>). **<sup>13</sup>C NMR** (126 MHz, CDCl<sub>3</sub>) δ 166.44 (s, 1C, C=O), 163.82 (s, 1C, C=O), 150.07 (s, 1C, N=C-CH), 142.29 (s), 136.48 (s), 136.35 (s), 135.59 (s), 135.49 (s), 130.43 (s), 130.35 (s), 128.66 (s), 128.63 (s), 128.50 (s), 128.44 (s), 128.31 (s), 128.20 (s), 128.17 (s), 128.14 (s), 128.05 (s), 128.00 (s), 127.71 (s), 127.51 (s), 127.25 (s), 123.90 (s), 122.42 (s), 67.38 (s, 1C, benzyl CH<sub>2</sub>), 67.22 (s, 1C, benzyl CH<sub>2</sub>). **HRMS** (+ESI) m/z: (M + H)<sup>+</sup> calc'd for C<sub>27</sub>H<sub>22</sub>NO<sub>4</sub>, 424.1549; found, 424.1549.

**General procedure for catalytic hydrophosphination on dialkyl and diaralkyl 2-((diphenylphosphorothioyl)(isoquinolin-1-yl)methylene)malonates (optimization of conditions; 6a, 6b and 6c)<sup>5</sup>**

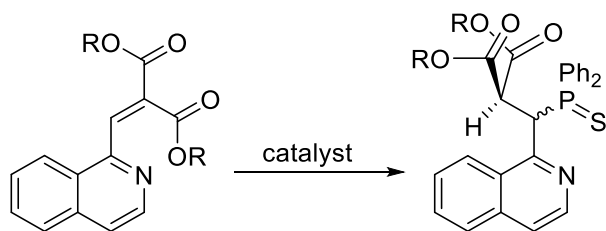

Diphenylphosphine (0.05 mmol, 9.31 mg, 1.0 equiv.) was weighed into a Schlenk flask under positive N<sub>2</sub> flow and 2.0 ml previously degassed solvent was added. Malonate substrate (0.05 mmol, 1.0 equiv.) and the catalyst (0.0025 mmol, 0.05 equiv.) were added to the solution and then the required temperature was adjusted. Upon the required temperature was reached, base (0.05 mmol, 1.0 equiv.) was added dropwise to the reaction mixture. The reaction was monitored by <sup>31</sup>P{<sup>1</sup>H} NMR spectroscopy. Upon completion of the reaction excess sulfur was added and the mixture was allowed to warm up and the volatiles were evaporated. The residue was purified by column chromatography on silica gel (*n*-hexane/ethyl acetate 5:1 to 2:1) to obtain the pure sulfurized phosphine product.

**Dimethyl 2-((diphenylphosphorothioyl)(isoquinolin-1-yl)methyl)malonate (6a)**

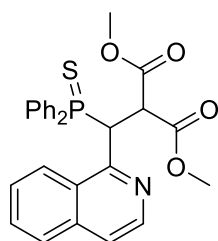

**6a** is a pale yellow solid. Yield: 86%

**<sup>1</sup>H NMR** (500 MHz, CDCl<sub>3</sub>) δ 8.40 (d, <sup>3</sup>J<sub>H-H</sub> = 5.6 Hz, 1H, ArH), 8.11 (dd, <sup>3</sup>J<sub>H-H</sub> = 11.6, 7.0 Hz, 2H, ArH), 8.02 (d, <sup>3</sup>J<sub>H-H</sub> = 8.3 Hz, 1H, ArH), 7.57 (d, <sup>3</sup>J<sub>H-H</sub> = 8.1 Hz, 1H, ArH), 7.51 – 7.37 (m, 7H, ArH), 7.35 (d, <sup>3</sup>J<sub>H-H</sub> = 5.0 Hz, 1H, ArH), 7.04 (t, <sup>3</sup>J<sub>H-H</sub> = 6.7 Hz, 1H, ArH), 6.91 (m, 2H, ArH), 5.83 (t, <sup>3</sup>J<sub>H-H</sub>, <sup>3</sup>J<sub>H-P</sub> = 10.2 Hz, 1H, CHCH(PPh<sub>2</sub>)Ar), 5.28 (t, <sup>3</sup>J<sub>H-H</sub>, <sup>2</sup>J<sub>H-P</sub> = 10.7 Hz, 1H, CHCH(PPh<sub>2</sub>)Ar), 3.37 (s, 3H, COOCH<sub>3</sub>), 3.36 (s, 3H, COOCH<sub>3</sub>). **<sup>13</sup>C NMR** (126 MHz, CDCl<sub>3</sub>) δ 168.46 – 168.11 (m, 2C, C=O), 155.43 (d, <sup>2</sup>J<sub>P-C</sub> = 6.6 Hz, 1C, Ar, N=C-C(H)P), 141.29 (d, <sup>1</sup>J<sub>P-C</sub> = 3.0 Hz, 1C), 135.90, 132.46 (d, <sup>1</sup>J<sub>P-C</sub> = 9.7 Hz, 1C, Ar, P-C<sub>6</sub>H<sub>5</sub>), 131.93 (d, <sup>1</sup>J<sub>P-C</sub> = 10.1 Hz, 1C, Ar, P-C<sub>6</sub>H<sub>5</sub>), 131.61 (s), 131.10 (s), 130.96 (s), 130.86 (s), 130.48 (s), 130.31 (s), 129.53 (s), 128.21 (d, <sup>1</sup>J<sub>P-C</sub> = 12.0 Hz), 128.00 (s), 127.40 (s), 127.31 (s), 127.17 (s), 127.14 (s), 124.50 (s), 120.13 (s), 54.40 (d, <sup>2</sup>J<sub>P-C</sub> = 3.0 Hz, 1C, CHCH(PPh<sub>2</sub>)Ar), 52.63 (s, 2C, COOCH<sub>3</sub>), 44.84 (d, <sup>1</sup>J<sub>P-C</sub> = 47.3 Hz, 1C, CHCH(PPh<sub>2</sub>)Ar). **<sup>31</sup>P{<sup>1</sup>H} NMR** (202 MHz, CDCl<sub>3</sub>) δ 48.73 (s). **HRMS** (+ESI) *m/z*: (M + H)<sup>+</sup> calc'd for C<sub>27</sub>H<sub>25</sub>NO<sub>4</sub>PS, 490.1242; found, 490.1240. Anal. Calc'd for C<sub>27</sub>H<sub>24</sub>NO<sub>4</sub>PS: C, 66.25; H, 4.94; N, 2.86. Found: 65.73; H, 4.80; N, 2.99%.

### Diethyl 2-((diphenylphosphorothioyl)(isoquinolin-1-yl)methyl)malonate (6b)

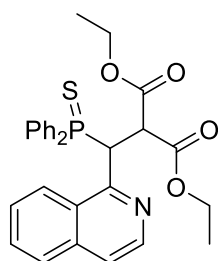

**6b** is a yellow solid. Yield: 58%

**<sup>1</sup>H NMR** (500 MHz, CDCl<sub>3</sub>) δ 8.39 (d, <sup>3</sup>J<sub>H-H</sub> = 5.6 Hz, 1H, ArH), 8.10 (dd, <sup>3</sup>J<sub>H-H</sub> = 12.1, <sup>3</sup>J<sub>H-H</sub> = 7.3 Hz, 2H, ArH), 8.05 (d, <sup>3</sup>J<sub>H-H</sub> = 8.4 Hz, 1H, ArH), 7.57 (d, <sup>3</sup>J<sub>H-H</sub> = 8.0 Hz, 1H, ArH), 7.53 – 7.36 (m, 7H, ArH), 7.34 (d, <sup>3</sup>J<sub>H-H</sub> = 5.2 Hz, 1H, ArH), 7.05 (t, <sup>3</sup>J<sub>H-H</sub> = 7.0 Hz, 1H, ArH), 6.94 (d, <sup>3</sup>J<sub>H-H</sub> = 5.2 Hz, 2H, ArH), 5.85 (t, <sup>3</sup>J<sub>H-H</sub>, <sup>3</sup>J<sub>H-P</sub> = 10.3 Hz, 1H CHCH(PPh<sub>2</sub>)Ar), 5.22 (t, <sup>3</sup>J<sub>H-H</sub>, <sup>2</sup>J<sub>H-P</sub> = 10.8 Hz, 1H, CHCH(PPh<sub>2</sub>)Ar), 3.95 – 3.63 (m, 4H, COOCH<sub>2</sub>CH<sub>3</sub>), 1.10 (t, <sup>3</sup>J<sub>H-H</sub> = 7.1 Hz, 3H, COOCH<sub>2</sub>CH<sub>3</sub>), 0.76 (t, <sup>3</sup>J<sub>H-H</sub> = 7.0 Hz, 3H, COOCH<sub>2</sub>CH<sub>3</sub>). **<sup>13</sup>C NMR** (126 MHz, CDCl<sub>3</sub>) δ 167.79 – 167.08 (m, 2C, C=O), 155.79 (d, <sup>2</sup>J<sub>P-C</sub> = 6.0 Hz, 1C, Ar, N=C-C(H)P), 141.31 (d, J<sub>P-C</sub> = 2.9 Hz), 135.86 (s), 132.45 (d, <sup>1</sup>J<sub>P-C</sub> = 9.7 Hz, 1C, Ar, P-C<sub>6</sub>H<sub>5</sub>), 132.03 (d, <sup>1</sup>J<sub>P-C</sub> = 10.0 Hz, 1C, Ar, P-C<sub>6</sub>H<sub>5</sub>), 131.50 (s), 130.78 (s), 129.49 (s), 128.11 (d, J<sub>P-C</sub> = 12.1 Hz), 127.34 (d, J<sub>P-C</sub> = 12.2 Hz), 124.63 (s), 119.96 (s), 61.82 (s, 1C, COOCH<sub>2</sub>CH<sub>3</sub>), 61.41 (s, 1C, COOCH<sub>2</sub>CH<sub>3</sub>), 54.93 (d, <sup>2</sup>J<sub>P-C</sub> = 2.8 Hz, 1C, CHCH(PPh<sub>2</sub>)Ar), 44.80 (d, <sup>1</sup>J<sub>P-C</sub> = 47.3 Hz, 1C, CHCH(PPh<sub>2</sub>)Ar), 13.71 (s, 1C, COOCH<sub>2</sub>CH<sub>3</sub>), 13.65 (s, 1C, COOCH<sub>2</sub>CH<sub>3</sub>). **<sup>31</sup>P{<sup>1</sup>H} NMR** (202 MHz, CDCl<sub>3</sub>) δ 48.81 (s). **HRMS** (+ESI) m/z: (M + H)<sup>+</sup> calc'd for C<sub>29</sub>H<sub>29</sub>NO<sub>4</sub>PS, 518.1555; found, 518.1555.

### Dibenzyl 2-((diphenylphosphorothioyl)(isoquinolin-1-yl)methyl)malonate (6c)

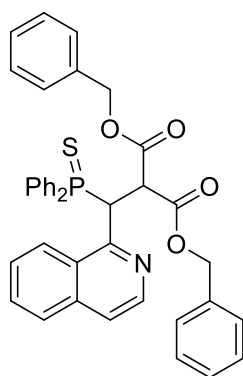

**6c** is a yellow solid. Yield: 64%

**<sup>1</sup>H NMR** (500 MHz, CDCl<sub>3</sub>) δ 8.31 (d, <sup>3</sup>J<sub>H-H</sub> = 5.6 Hz, 1H, ArH), 8.05 (dd, <sup>3</sup>J<sub>H-H</sub> = 12.2, <sup>3</sup>J<sub>H-H</sub> = 7.6 Hz, 2H, ArH), 7.97 (d, <sup>3</sup>J<sub>H-H</sub> = 8.3 Hz, 1H, ArH), 7.58 – 7.27 (m, 14H, ArH), 7.25 – 7.19 (m, 2H, ArH), 7.15 (t, <sup>3</sup>J<sub>H-H</sub> = 7.4 Hz, 1H, ArH), 7.07 (t, <sup>3</sup>J<sub>H-H</sub> = 7.5 Hz, 2H, ArH), 7.05 (s, 1H, ArH), 6.92 (m, 2H, ArH), 6.83 (d, <sup>3</sup>J<sub>H-H</sub> = 7.3 Hz, 2H, ArH), 5.87 (t, <sup>3</sup>J<sub>H-H</sub>, <sup>3</sup>J<sub>H-P</sub> = 10.4 Hz, 1H, CHCH(PPh<sub>2</sub>)Ar), 5.39 (t, <sup>3</sup>J<sub>H-H</sub>, <sup>2</sup>J<sub>H-P</sub> = 10.7 Hz, 1H, CHCH(PPh<sub>2</sub>)Ar), 4.85 – 4.77 (m, 2H, benzyl CH<sub>2</sub>), 4.72 (s, 2H, benzyl CH<sub>2</sub>). **<sup>13</sup>C NMR** (126 MHz, CDCl<sub>3</sub>) δ 167.79 – 167.08 (m, 2C, C=O), 155.46 (d, <sup>2</sup>J<sub>P-C</sub> = 6.2 Hz, 1C, Ar, N=C-C(H)P), 141.27 (d, J<sub>P-C</sub> = 3.0 Hz), 135.87 (s), 135.29 (s), 134.86 (s), 132.42 (d, <sup>1</sup>J<sub>P-C</sub> = 9.4 Hz 1C, Ar, P-C<sub>6</sub>H<sub>5</sub>), 132.08 (d, <sup>1</sup>J<sub>P-C</sub> = 9.9 Hz, 1C, Ar, P-C<sub>6</sub>H<sub>5</sub>), 131.48 (d, J<sub>P-C</sub> = 2.8 Hz), 130.80 (s), 130.32 (s), 129.46 (s), 128.35 (s), 128.19 (s), 128.07 (s), 127.99 (s), 127.94 (s), 127.90 (s), 127.87 (s), 127.36 (d, J<sub>P-C</sub> = 12.4 Hz), 127.09 (s), 124.58 (s), 120.03 (s), 67.30 (s, 1C, benzyl CH<sub>2</sub>), 67.12 (s, 1C, benzyl CH<sub>2</sub>), 54.89 (d, <sup>2</sup>J<sub>P-C</sub> = 3.0 Hz, 1C, CHCH(PPh<sub>2</sub>)Ar), 45.15 (d, <sup>1</sup>J<sub>P-C</sub>

= 45.7 Hz, 1C, CHCH(PPh<sub>2</sub>)Ar). <sup>31</sup>P{<sup>1</sup>H} NMR (202 MHz, CDCl<sub>3</sub>) δ 48.66 (s). HRMS (+ESI) m/z: (M + H)<sup>+</sup> calc'd for C<sub>39</sub>H<sub>33</sub>NO<sub>4</sub>PS, 642.1868; found, 642.1865.

### General procedure for generating dichloro P,N palladium and platinum complexes ((R)-9 and (R)-10)

Diphenylphosphine (0.17 mmol, 0.032 g, 1.0 equiv.) was weighed into a Schlenk flask under positive N<sub>2</sub> flow and 7.0 ml previously degassed DCM was added. Substrate **5a** (0.17 mmol, 0.046 g, 1.0 equiv.) and (*S*)-**2** catalyst (0.0085 mmol, 0.005 g, 0.05 equiv.) were added to the solution and then the mixture was cooled down to -80 °C. Upon the required temperature was reached, triethylamine (0.17 mmol, 0.017 g, 1.0 equiv.) was added dropwise to the reaction mixture. After the reaction reached the desired conversion, TEA and the solvent was removed by using nitrogen flow and vacuum while the low temperature was permanently maintained. The residue was then triturated four times with degassed hexane to remove excess diphenylphosphine. The crude material was redissolved in DCM and filtered through a short celite plug under Schlenk conditions. MCl<sub>2</sub>(MeCN)<sub>2</sub> (0.17 mmol, 1.0 equiv.) was then added to the free P,N ligand **8** at -80 °C, stirred for an hour and allowed to rt. Each of the resulting air-stable complex was filtered through short celite plug and recrystallized from DCM with diethyl ether to afford enantiopure crystals.

#### (R)-(κ<sup>2</sup>-P,N)-(dimethyl 2-((diphenylphosphaneyl)(isoquinolin-1-yl)methyl)malonate)-dichloropalladium(II) ((R)-9)

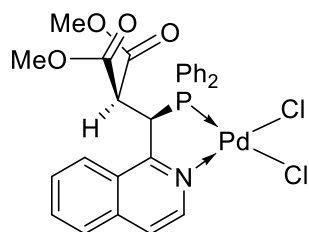

**9** is a yellow solid. Yield: 85%. [ $\alpha$ ]<sub>D</sub><sup>25</sup> = -479 (*c* 1.0, CH<sub>2</sub>Cl<sub>2</sub>).

<sup>1</sup>H NMR (500 MHz, CDCl<sub>3</sub>) δ 9.79 (d, <sup>3</sup>J<sub>H-H</sub> = 6.6 Hz, 1H, ArH, HC=CH-N), 8.29 (d, <sup>3</sup>J<sub>H-H</sub> = 8.6 Hz, 1H, ArH), 8.02 – 7.86 (m, 7H, ArH), 7.81 – 7.70 (m, 2H, ArH), 7.59 (t, <sup>3</sup>J<sub>H-H</sub> = 6.9 Hz, 2H, ArH), 7.53 (t, <sup>3</sup>J<sub>H-H</sub> = 7.6 Hz, 2H, ArH), 7.48 (td, <sup>3</sup>J<sub>H-P</sub> = 7.7 Hz, <sup>3</sup>J<sub>H-H</sub> = 2.7 Hz, 2H, P-C<sub>6</sub>H<sub>5</sub>), 7.43 (td, <sup>3</sup>J<sub>H-P</sub> = 7.7 Hz, <sup>3</sup>J<sub>H-H</sub> = 2.5 Hz, 2H, P-C<sub>6</sub>H<sub>5</sub>), 5.89 (dd, <sup>3</sup>J<sub>P-H</sub> = 14.8 Hz, <sup>3</sup>J<sub>H-H</sub> = 9.4 Hz, 1H, CHCH(PPh<sub>2</sub>)Ar), 4.49 (dd, <sup>2</sup>J<sub>P-H</sub> = 15.6 Hz, <sup>3</sup>J<sub>H-H</sub> = 9.4 Hz, 1H, CHCH(PPh<sub>2</sub>)Ar), 3.30 (s, 3H, COOCH<sub>3</sub>), 3.25 (s), 2.76 (s), 2.73 (s, 3H, COOCH<sub>3</sub>). <sup>13</sup>C NMR (126 MHz, CDCl<sub>3</sub>) δ 166.89 (s, 1C, Ar, HC=CH-N), 166.17 (d, <sup>3</sup>J<sub>P-C</sub> = 12.0 Hz, 1C, C=O), 161.97 (d, <sup>3</sup>J<sub>P-C</sub> = 8.1 Hz, 1C, C=O), 145.40 (s), 136.54 (s), 136.29 (d, <sup>2</sup>J<sub>P-C</sub> = 11.3 Hz, 1C, Ar, N=C-C(H)P), 133.44 (s), 133.10 (d, *J*<sub>P-C</sub> = 2.8 Hz), 132.74 (d, *J*<sub>P-C</sub> = 2.9 Hz), 132.61 (d, <sup>1</sup>J<sub>P-C</sub> = 10.5 Hz, 1C, Ar, P-C<sub>6</sub>H<sub>5</sub>), 129.93 (s), 129.71 (d, <sup>1</sup>J<sub>P-C</sub> = 11.4 Hz, 1C, Ar, P-C<sub>6</sub>H<sub>5</sub>), 128.62 (d, *J*<sub>P-C</sub> = 12.1 Hz), 126.71 (d, *J*<sub>P-C</sub> = 10.6 Hz), 125.04 (d, *J*<sub>P-C</sub> = 53.6 Hz), 123.27 (s), 122.60 (d, *J*<sub>P-C</sub> = 56.0 Hz), 53.22 (s, 1C, COOCH<sub>3</sub>), 53.17 (d, <sup>2</sup>J<sub>P-C</sub> = 5.3 Hz, 1C, CHCH(PPh<sub>2</sub>)Ar), 52.71 (s, 1C, COOCH<sub>3</sub>), 47.08 (d, <sup>1</sup>J<sub>P-C</sub> = 30.4 Hz, 1C, CHCH(PPh<sub>2</sub>)Ar), 30.93 (s), 29.69 (s). <sup>31</sup>P{<sup>1</sup>H} NMR (202 MHz, CDCl<sub>3</sub>) δ 52.13 (s). HRMS (+ESI) m/z: (M + H)<sup>+</sup> calc'd for



C<sub>27</sub>H<sub>25</sub>Cl<sub>2</sub>NO<sub>4</sub>PPd, 635.9937; found, 635.9931. **Anal.** Calc'd for C<sub>27</sub>H<sub>24</sub>Cl<sub>2</sub>NO<sub>4</sub>PPd: C, 51.09; H, 3.81; N, 2.21. Found: C, 48.51; H, 3.61; N, 2.03%.

**(R)-(κ<sup>2</sup>-P,N)-(dimethyl 2-((diphenylphosphaneyl)(isoquinolin-1-yl)methyl)malonate)-dichloroplatinum(II) ((R)-10)**

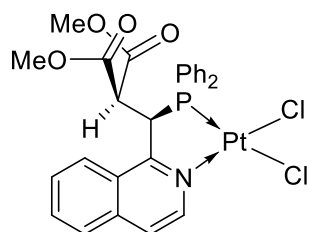

**10** is a light brown solid. Yield: 67%.  $[\alpha]_D^{25} = -43$  (c 0.5, CH<sub>2</sub>Cl<sub>2</sub>).

**<sup>1</sup>H NMR** (500 MHz, CDCl<sub>3</sub>)  $\delta$  10.03 (d,  $^3J_{H-H} = 6.7$  Hz, 1H, ArH, HC=CH-N), 8.30 (d,  $^3J_{H-H} = 8.5$  Hz, 1H, ArH), 8.08 – 7.94 (m, 5H, ArH), 7.93 (s, ArH), 7.91 (s, 1H, ArH), 7.90 (s, 1H, ArH), 7.73 (m, 1H, ArH), 7.69 (d,  $^3J_{H-H} = 6.8$  Hz, 1H, ArH), 7.57 (m, 2H, ArH), 7.53 – 7.41 (m, 6H, ArH), 5.83 (dd,  $^3J_{P-H} = 12.3$ ,  $^3J_{H-H} = 9.9$  Hz, 1H, CHCH(PPh<sub>2</sub>)Ar), 4.52 (dd,  $^2J_{P-H} = 14.7$ ,  $^3J_{H-H} = 9.9$  Hz, 1H, CHCH(PPh<sub>2</sub>)Ar), 3.30 (s), 3.27 (s, 3H, COOCH<sub>3</sub>), 2.74 (s), 2.69 (s, 3H, COOCH<sub>3</sub>). **<sup>13</sup>C NMR** (126 MHz, CDCl<sub>3</sub>)  $\delta$  166.98 (s, 1C, Ar, HC=CH-N), 166.34 (d,  $^3J_{P-C} = 12.2$  Hz, 1C, C=O), 162.84 (d,  $^3J_{P-C} = 5.7$  Hz, 1C, C=O), 144.38 (s), 141.96 (s), 139.29 (s), 136.26 (d,  $^2J_{P-C} = 11.7$  Hz, 1C, Ar, N=C-C(H)P), 135.95 (s), 133.18 (s), 132.94 (s), 132.66 (d,  $^1J_{P-C} = 10.9$  Hz, 1C, Ar, P-C<sub>6</sub>H<sub>5</sub>), 132.45 (s), 130.16 (s), 129.50 (d,  $^1J_{P-C} = 11.5$  Hz, 1C, Ar, P-C<sub>6</sub>H<sub>5</sub>), 128.51 (d,  $J_{P-C} = 12.4$  Hz), 127.56 (d,  $J_{P-C} = 48.2$  Hz), 126.99 (d,  $J_{P-C} = 8.7$  Hz), 124.60 (d,  $J_{P-C} = 62.1$  Hz), 123.34 (s), 120.84 (d,  $J_{P-C} = 63.8$  Hz), 53.14 (s, 1C, COOCH<sub>3</sub>), 52.56 (s, 1C, COOCH<sub>3</sub>), 52.12 (d,  $^2J_{P-C} = 4.3$  Hz, 1C, CHCH(PPh<sub>2</sub>)Ar), 46.23 (d,  $^1J_{P-C} = 37.1$  Hz, 1C, CHCH(PPh<sub>2</sub>)Ar), 33.82 (s), 31.93 (s), 29.70 (s), 29.36 (s), 22.69 (s), 14.12 (s). **<sup>31</sup>P{<sup>1</sup>H} NMR** (202 MHz, CDCl<sub>3</sub>)  $\delta$  28.71 (s), 28.72 (d,  $^1J_{Pt-P} = 3826.9$  Hz). **HRMS** (+ESI) m/z: (M + H)<sup>+</sup> calc'd for C<sub>27</sub>H<sub>25</sub>Cl<sub>2</sub>NO<sub>4</sub>PPt, 723.0546; found, 723.0544. **Anal.** Calc'd for C<sub>27</sub>H<sub>24</sub>Cl<sub>2</sub>NO<sub>4</sub>PPt: C, 44.83; H, 3.34; N, 1.94. Found: C, 44.67; H, 3.45; N, 2.10%.

**General procedure for synthesizing P,N rhodium and iridium COD tetrafluoroborate complexes (13 and 14)<sup>6</sup>**

[M(COD)Cl]<sub>2</sub> (0.04 mmol, 0.5 equiv.) was dissolved in 5.0 ml degassed DCM and stirred under nitrogen. AgBF<sub>4</sub> (0.08 mmol, 1.0 equiv.) was dissolved in degassed methanol and this was added to the DCM solution. This mixture was stirred at rt in the dark for 3 hrs.

The resulting M<sup>+</sup>(COD) <sup>-</sup>BF<sub>4</sub> complex was filtered through a short celite plug under nitrogen and immediately added to the DCM solution of **8** P,N ligand (0.08 mmol, 1.0 equiv) (obtained in the aforementioned way) at -80 °C, stirred for an hour under nitrogen and allowed to rt. The forming (P,N)M<sup>+</sup>(COD) <sup>-</sup>BF<sub>4</sub> complex was filtered through a short celite plug under Schlenk conditions and the solvent was removed by vacuum.

**[( $\kappa^2$ -P,N)-(dimethyl 2-((diphenylphosphaneyl)(isoquinolin-1-yl)methyl)malonate)][(1,2,5,6- $\eta$ )(1Z,5Z)-cycloocta-1,5-diene]-rhodium(I) tetrafluoroborate (**13**)**

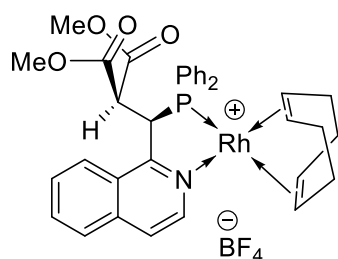

**13** is a brown solid. Yield: 99.6 % (crude).

**$^1\text{H}$  NMR** (500 MHz,  $\text{CDCl}_3$ )  $\delta$  8.18 (d,  $^3J_{\text{H-H}} = 8.7$  Hz, 1H, ArH), 8.07 (d,  $^3J_{\text{H-H}} = 6.5$  Hz, 1H, ArH), 7.96 (t,  $^3J_{\text{H-H}} = 9.1$  Hz, 1H, ArH), 7.89 (d,  $^3J_{\text{H-H}} = 6.4$  Hz, 1H, ArH), 7.86 (d,  $^3J_{\text{H-H}} = 8.3$  Hz, 1H, ArH), 7.77 (d,  $^3J_{\text{H-H}} = 7.3$  Hz, 1H, ArH), 7.74–7.69 (m, 3H, ArH), 7.68–7.63 (m, 1H, ArH), 7.55–7.49 (m, 1H, ArH), 7.48–7.38 (m, 5H, ArH), 7.33–7.27 (m, 3H, ArH), 5.88 (dd,  $^3J_{\text{P-H}} = 13.2$  Hz,  $^3J_{\text{H-H}} = 8.1$  Hz, 1H, CHCH(PPh<sub>2</sub>)Ar), 5.67 (dd,  $^3J_{\text{H-H}} = 15.1$  Hz,  $^2J_{\text{Rh-H}} = 1.4$  Hz, 2H, COD HC=CH), 4.65 (dd,  $^2J_{\text{P-H}} = 15.0$  Hz,  $^3J_{\text{H-H}} = 8.1$  Hz, 1H, CHCH(PPh<sub>2</sub>)Ar), 4.38 (d,  $^3J_{\text{H-H}} = 55.1$  Hz,  $^2J_{\text{Rh-H}} = 5.5$  Hz, 2H, COD HC=CH), 3.70–3.60 (m), 3.46 (s, 3H, COOCH<sub>3</sub>), 3.24–3.14 (m, 1H), 2.81 (s, 3H, COOCH<sub>3</sub>), 2.74–2.53 (m, 2H, COD CH<sub>2</sub>), 2.37 (m, 3H, COD CH<sub>2</sub>), 2.10–1.99 (m, 2H, COD CH<sub>2</sub>).  **$^{13}\text{C}$  NMR** (126 MHz,  $\text{CDCl}_3$ )  $\delta$  167.26 (s, 1C, Ar, HC=CH-N), 166.16 (d,  $^3J_{\text{P-C}} = 9.4$  Hz, 1C, C=O), 162.56 (d,  $^3J_{\text{P-C}} = 9.3$  Hz, 1C, C=O), 142.02 (s), 136.68 (s), 133.84–133.40 (m), 133.55 (d,  $^2J_{\text{P-C}} = 10.8$  Hz, 1C, Ar, N=C-C(H)P), 133.16 (d,  $^1J_{\text{P-C}} = 10.8$  Hz, 1C, Ar, P-C<sub>6</sub>H<sub>5</sub>), 132.51 (d,  $J_{\text{P-C}} = 2.4$  Hz), 132.33 (d,  $J_{\text{P-C}} = 2.1$  Hz), 130.07 (s), 129.63 (dd,  $^2J_{\text{Rh-C}} = 20.9$  Hz,  $^1J_{\text{P-C}} = 10.3$  Hz, 1C, Ar, P-C<sub>6</sub>H<sub>5</sub>), 128.01 (s), 128.00 (s), 127.68 (s), 127.09 (s), 127.02 (s), 126.97 (s), 124.62 (d,  $J_{\text{P-C}} = 2.2$  Hz), 124.45 (s), 124.32 (d,  $J_{\text{P-C}} = 2.7$  Hz), 114.05 (s), 109.30–108.82 (m, 1C, COD, HC=CH), 107.50 (d,  $J = 7.8$  Hz), 106.60–106.16 (m, 1C, COD, HC=CH), 79.44 (dd,  $^2J_{\text{P-C}} = 10.8$  Hz,  $^1J_{\text{Rh-C}} = 4.9$  Hz, 1C, COD, HC=CH), 78.07 (s), 76.47–76.24 (m, 1C, COD, HC=CH), 55.89 (d,  $^2J_{\text{P-C}} = 8.4$  Hz, 1C, CHCH(PPh<sub>2</sub>)Ar), 53.46 (s, 1C, COOCH<sub>3</sub>), 52.85 (s, 1C, COOCH<sub>3</sub>), 47.75 (s), 47.59 (d,  $^1J_{\text{P-C}} = 25.2$  Hz, 1C, CHCH(PPh<sub>2</sub>)Ar), 35.55 (s), 33.81 (s), 31.91 (s), 30.88 (s), 29.34 (s), 29.14 (s), 28.97 (s), 26.03 (s), 22.67 (s), 18.36 (s), 14.10 (s), 9.13 (s), 1.00 (s).  **$^{19}\text{F}$  NMR** (376 MHz,  $\text{CDCl}_3$ )  $\delta$  -153.06 (s).  **$^{31}\text{P}\{^1\text{H}\}$  NMR** (202 MHz,  $\text{CDCl}_3$ )  $\delta$  49.69 (d,  $^1J_{\text{Rh-P}} = 156.2$  Hz). **HRMS** (+ESI)  $m/z$ : (M + H – BF<sub>4</sub><sup>−</sup>)<sup>+</sup> calc'd for C<sub>35</sub>H<sub>37</sub>NO<sub>4</sub>PRh, 669.1515; found, 669.1519.

**[( $\kappa^2$ -P,N)-(dimethyl 2-((diphenylphosphaneyl)(isoquinolin-1-yl)methyl)malonate)][(1,2,5,6- $\eta$ )(1Z,5Z)-cycloocta-1,5-diene]-iridium(I) tetrafluoroborate (**14**)**

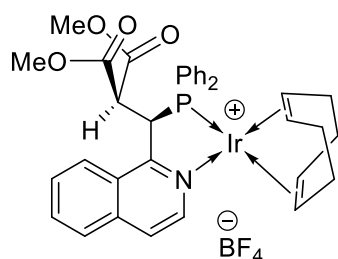

**14** is a dark-red solid. Yield: >99.9% (crude).

**$^1\text{H}$  NMR** (500 MHz,  $\text{CDCl}_3$ )  $\delta$  8.49 (d,  $^3J_{\text{H-H}} = 6.5$  Hz, 1H, ArH), 8.20 (d,  $^3J_{\text{H-H}} = 8.7$  Hz, 1H, ArH), 8.08 (d,  $^3J_{\text{H-H}} = 6.4$  Hz, 1H, ArH), 7.93 (d,  $^3J_{\text{H-H}} = 8.1$  Hz, 1H, ArH), 7.83 – 7.79 (m, 2H, ArH), 7.72 – 7.61 (m, 4H, ArH), 7.53 (d,  $^3J_{\text{H-H}} = 3.9$  Hz, 2H, ArH), 7.50 – 7.43 (m, 4H, ArH), 7.36 (d,  $^3J_{\text{H-H}} = 5.2$  Hz, 3H, ArH), 7.16 (s, ArH), 6.97 (d,  $^3J_{\text{H-H}} = 9.2$  Hz, 1H, ArH), 6.09 (dd,  $^3J_{\text{P-H}} = 12.2$  Hz,  $^3J_{\text{H-H}} = 9.05$  Hz, 1H, CHCH(PPh<sub>2</sub>)Ar), 5.62 (s, 1H, COD HC=CH), 5.36 (s, 1H, COD HC=CH), 4.56 (dd,  $^2J_{\text{P-H}} = 14.1$  Hz,  $^3J_{\text{H-H}} = 9.05$  Hz, 1H, CHCH(PPh<sub>2</sub>)Ar), 4.20 (s, 1H, COD HC=CH), 3.82 (s, 1H, COD HC=CH), 3.42 (s), 3.40 (s, 3H, COOCH<sub>3</sub>), 3.19 – 3.10 (m), 2.73 (s, 3H, COOCH<sub>3</sub>), 2.58 (s, 4H, COD CH<sub>2</sub>), 2.32 – 2.16 (m, 2H, COD CH<sub>2</sub>), 1.82 – 1.65 (m, 2H, COD CH<sub>2</sub>).  **$^{13}\text{C}$  NMR** (126 MHz,  $\text{CDCl}_3$ )  $\delta$  167.03 (s, 1C, Ar, HC=CH-N), 166.09 (d,  $^3J_{\text{P-C}} = 10.3$  Hz, 1C, C=O), 165.17 (d,  $^3J_{\text{P-C}} = 7.4$  Hz, 1C, C=O), 164.54 (s), 142.34 (s), 136.85 (s), 134.22 – 133.81 (m), 133.62 (d,  $^2J_{\text{P-C}} = 10.6$  Hz, 1C, Ar, N=C-C(H)P), 132.72 (d,  $^2J_{\text{P-C}} = 19.0$  Hz, 1C, Ar, P-C<sub>6</sub>H<sub>5</sub>), 131.12 (d,  $J_{\text{P-C}} = 9.0$  Hz), 130.54 (s), 129.86 (d,  $^2J_{\text{P-C}} = 10.7$  Hz, 1C, Ar, P-C<sub>6</sub>H<sub>5</sub>), 129.50 (d,  $J_{\text{P-C}} = 10.5$  Hz), 129.01 (d,  $J_{\text{P-C}} = 9.9$  Hz), 128.15 (s), 127.62 (s), 127.49 (s), 127.18 – 126.79 (m), 125.19 (s), 122.49 (d,  $J_{\text{P-C}} = 46.8$  Hz), 99.76 (s), 97.35 (d,  $^2J_{\text{P-C}} = 7.7$  Hz, 1C, COD, HC=CH), 96.87 (d,  $^2J_{\text{P-C}} = 8.9$  Hz, 1C, COD, HC=CH) 65.79 (d,  $^2J_{\text{P-C}} = 10.4$  Hz, 1C, COD, HC=CH), 63.06 (d,  $^2J_{\text{P-C}} = 13.8$  Hz 1C, COD, HC=CH), 55.28 (d,  $^2J_{\text{P-C}} = 6.8$  Hz, 1C, CHCH(PPh<sub>2</sub>)Ar), 53.43 (s, 1C, COOCH<sub>3</sub>), 52.86 (s, 1C, COOCH<sub>3</sub>), 49.59 (s), 48.22 (d,  $^1J_{\text{P-C}} = 30.3$  Hz, 1C, CHCH(PPh<sub>2</sub>)Ar), 47.73 (s), 43.77 (d,  $J = 8.6$  Hz), 36.80 (s), 32.60 (s), 31.91 (s), 29.68 (s), 29.34 (s), 28.94 (s), 25.75 (s), 25.14 (s), 23.24 (d,  $J = 4.3$  Hz), 23.04 (s), 22.68 (s), 14.10 (s), 9.13 (s).  **$^{19}\text{F}$  NMR** (376 MHz,  $\text{CDCl}_3$ )  $\delta$  -153.26 (s).  **$^{31}\text{P}\{^1\text{H}\}$  NMR** (202 MHz,  $\text{CDCl}_3$ )  $\delta$  41.49 (s). **HRMS** (+ESI)  $m/z$ : (M + H – BF<sub>4</sub>)<sup>+</sup> calc'd for C<sub>35</sub>H<sub>37</sub>NO<sub>4</sub>PIr, 759.2090; found, 759.2097.

**Preparation of {(R)-(κ<sup>2</sup>-C<sup>2</sup>,N)-1-[1-(dimethylamino)ethyl]naphthyl}-{(R)-(κ<sup>2</sup>-P,N)-2-((diphenylphosphane)yl)(isoquinolin-1-yl)methyl)malonate}}-palladium(II) perchlorate ((R,R)-22).**

Diphenylphosphine (0.08 mmol, 0.015 g, 1.0 equiv.) was weighed into a Schlenk flask under positive N<sub>2</sub> flow and 3.0 ml previously degassed DCM was added. Malonate substrate **5a** (0.08 mmol, 0.022 g, 1.0 equiv.) and (*S*)-**2** catalyst (0.004 mmol, 0.0025 g, 0.05 equiv.) were added to the solution and then the mixture was cooled down to -80 °C. Upon the required temperature was reached, triethylamine (0.08 mmol, 0.009 g, 1.0 equiv) was added dropwise to the reaction mixture. After the completion of the reaction, (*R*)-**1** complex (0.08 mmol, 0.042 g, 1.0 equiv.) was added and the mixture was allowed to warm up to rt. The solution was washed with water and brine, dried, filtered through short celite plug, then the solvent was evaporated. The crude complex was recrystallized from DCM with diethyl ether to afford diastereomerically pure crystals.

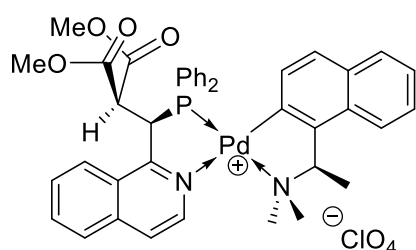

(*R,R*)-**22** is a bright-yellow solid. Yield: 33%. [ $\alpha$ ]<sub>D</sub><sup>25</sup> = -247 (*c* 2.0, CH<sub>2</sub>Cl<sub>2</sub>).

<sup>1</sup>H NMR (500 MHz, CDCl<sub>3</sub>)  $\delta$  8.72 (d, <sup>3</sup>*J*<sub>H-H</sub> = 6.1 Hz, 1H, ArH, HC=CH-N), 8.32 (d, <sup>3</sup>*J*<sub>H-H</sub> = 8.6 Hz, 1H, ArH), 8.25 (d, <sup>3</sup>*J*<sub>H-H</sub> = 6.1 Hz, 1H, ArH), 7.99 (d, <sup>3</sup>*J*<sub>H-H</sub> = 8.2 Hz, 1H, ArH), 7.89 – 7.76 (m, 5H, ArH), 7.74 (d, <sup>3</sup>*J*<sub>H-H</sub> = 8.1 Hz, 1H, ArH), 7.58 – 7.47 (m, 5H, ArH), 7.47 – 7.40 (m, 3H, ArH), 7.30 (t, <sup>3</sup>*J*<sub>H-H</sub> = 6.9 Hz, 2H, ArH), 7.20 (d, <sup>3</sup>*J*<sub>H-H</sub> = 8.4 Hz, 1H, ArH), 6.97 – 6.91 (m, 1H, ArH), 5.91 (dd, <sup>3</sup>*J*<sub>H-P</sub> = 13.7, <sup>3</sup>*J*<sub>H-H</sub> = 8.6 Hz, 1H, CHCH(PPh<sub>2</sub>)Ar), 4.74 – 4.60 (m, 2H, NCHCH<sub>3</sub>, CHCH(PPh<sub>2</sub>)Ar), 3.31 (s, 3H, COOCH<sub>3</sub>), 3.28 (s), 3.19 (s), 3.13 (d, <sup>4</sup>*J*<sub>P-H</sub> = 3.0 Hz, 3H, NCHCH<sub>3</sub>), 3.09 (s, 3H, NCHCH<sub>3</sub>), 2.85 (s, 3H, COOCH<sub>3</sub>), 2.22 (d, <sup>3</sup>*J*<sub>H-H</sub> = 6.2 Hz, 3H, NCHCH<sub>3</sub>), 1.29 (s), 1.26 (s). <sup>13</sup>C NMR (126 MHz, CDCl<sub>3</sub>)  $\delta$  166.60 (s, 1C, Ar, HC=CH-N), 165.95 (d, <sup>3</sup>*J*<sub>P-C</sub> = 11.3 Hz, 1C, C=O), 158.91 (d, <sup>3</sup>*J*<sub>P-C</sub> = 5.4 Hz, 1C, C=O), 150.18 (s), 146.55 (s), 142.29 (s), 137.27 (d, <sup>2</sup>*J*<sub>P-C</sub> = 12.6 Hz, Ar, N=C-C(H)P), 137.02 (s), 135.44 (d, <sup>1</sup>*J*<sub>P-C</sub> = 12.0 Hz, Ar, P-C<sub>6</sub>H<sub>5</sub>), 133.17 (s), 133.07 (s), 132.96 (t, 1C, *J*<sub>P-C</sub> = 2.8 Hz, Ar), 131.81 (s), 130.06 (s), 129.96 (d, *J*<sub>P-C</sub> = 4.5 Hz, 1C, Ar), 129.01 (d, <sup>1</sup>*J*<sub>P-C</sub> = 11.2 Hz, Ar, P-C<sub>6</sub>H<sub>5</sub>), 128.91 (d, *J*<sub>P-C</sub> = 3.9 Hz), 128.37 (s), 127.11 (d, *J*<sub>P-C</sub> = 6.0 Hz), 126.66 (d, *J*<sub>P-C</sub> = 7.2 Hz), 126.30 (s), 125.39 (s), 125.18 (s), 124.80 (s), 123.27 (s), 123.17 (s), 122.82 (s), 74.33 (d, <sup>3</sup>*J*<sub>P-C</sub> = 2.8 Hz, 1C, NCHCH<sub>3</sub>), 55.02 (d, <sup>2</sup>*J*<sub>P-C</sub> = 9.4 Hz, 1C, CHCH(PPh<sub>2</sub>)Ar), 53.23 (s, 1C, COOCH<sub>3</sub>), 52.89 (s, 1C, COOCH<sub>3</sub>), 52.09 (d, <sup>3</sup>*J*<sub>P-C</sub> = 2.4 Hz, 1C, NCHCH<sub>3</sub>), 47.29 (s, 1C, NCHCH<sub>3</sub>), 46.08 (d, <sup>1</sup>*J*<sub>P-C</sub> = 32.3 Hz, 1C, CHCH(PPh<sub>2</sub>)Ar), 29.69 (s), 24.51 (s, 1C, NCHCH<sub>3</sub>). <sup>31</sup>P{<sup>1</sup>H} NMR (202 MHz, CDCl<sub>3</sub>)  $\delta$  57.75 (s), 54.85 (s). HRMS (+ESI) *m/z*: (M + H)<sup>+</sup> calc'd for C<sub>41</sub>H<sub>41</sub>ClN<sub>2</sub>O<sub>8</sub>PPd, 861.1324; found, 861.1301.

### 3. References

1. (a) Allen, D. G.; McLaughlin, G. M.; Robertson, G. B.; Steffen, W. L.; Salem, G.; Wild, S. B., Resolutions with metal complexes. Preparation and resolution of (R,S)-methylphenyl(8-quinolyl)phosphine and its arsenic analog. Crystal and molecular structure of (+)589-[(R)-dimethyl(1-ethyl- $\alpha$ -naphthyl)aminato-C2,N][(S)-methylphenyl(8-quinolyl)phosphine]palladium(II) hexafluorophosphate. *Inorg. Chem.* **1982**, 21 (3), 1007-1014; (b) Ng, J. K.-P.; Tan, G.-K.; Vittal, J. J.; Leung, P.-H., Optical Resolution and the Study of Ligand Effects on the Ortho-Metalation Reaction of Resolved ( $\pm$ )-Diphenyl[1-(1-naphthyl)ethyl]phosphine and Its Arsenic Analogue. *Inorg. Chem.* **2003**, 42 (23), 7674-7682; (c) Huang, Y.; Chew, R. J.; Li, Y.; Pullarkat, S. A.; Leung, P.-H., Direct Synthesis of Chiral Tertiary Diphosphines via Pd(II)-Catalyzed Asymmetric Hydrophosphination of Dienones. *Org. Lett.* **2011**, 13 (21), 5862-5865; (d) Yang, X.-Y.; Tay, W. S.; Li, Y.; Pullarkat, S. A.; Leung, P.-H., Versatile Syntheses of Optically Pure PCE Pincer Ligands: Facile Modifications of the Pendant Arms and Ligand Backbones. *Organometallics* **2015**, 34 (8), 1582-1588.
2. (a) Giordano, C.; Minisci, F.; Vismara, E.; Levi, S., A general, selective, and convenient procedure of homolytic formylation of heteroaromatic bases. *J. Org. Chem.* **1986**, 51 (4), 536-537; (b) Landa, A.; Minkkilä, A.; Blay, G.; Jørgensen, K. A., Bis(oxazoline) Lewis Acid Catalyzed Aldol Reactions of Pyridine N-Oxide Aldehydes—Synthesis of Optically Active 2-(1-Hydroxyalkyl)pyridine Derivatives: Development, Scope, and Total Synthesis of an Indolizine Alkaloid. *Chem. Eur. J.* **2006**, 12 (13), 3472-3483.
3. Allinson, G.; J. Bushby, R.; V. Jesudason, M.; Paillaud, J.-L.; Taylor, N., The synthesis of singlet ground state derivatives of non-Kekulé polynuclear aromatics. *J. Chem. Soc., Perkin Trans. 2* **1997**, (2), 147-156.
4. Chen, H.; Luzy, J.-P.; Gresh, N.; Garbay, C., An Efficient and Enantioselective Synthesis of Suitably Protected  $\beta$ -[1-(4-Malonyl)naphthyl]-L-alanine and  $\beta$ -[1-(4-Malonylmethyl)naphthyl]-L-alanine: Novel Fluorescent and Non-Hydrolysable Phosphotyrosine Mimetics. *Eur. J. Org. Chem.* **2006**, 2006 (10), 2329-2335.
5. Xu, C.; Jun Hao Kennard, G.; Hennesdorf, F.; Li, Y.; Pullarkat, S. A.; Leung, P.-H., Chiral Phosphapalladacycles as Efficient Catalysts for the Asymmetric Hydrophosphination of Substituted Methylidenemalonate Esters: Direct Access to Functionalized Tertiary Chiral Phosphines. *Organometallics* **2012**, 31 (8), 3022-3026.
6. Aydemir, M.; Meric, N.; Kayan, C.; Ok, F.; Baysal, A., Rhodium-catalyzed transfer hydrogenation with functionalized bis(phosphino)amine ligands. *Inorg. Chim. Acta* **2013**, 398, 1-10.

## 4. NMR spectra

### NMR spectroscopic data of isoquinoline-1-carbaldehyde (**4**)

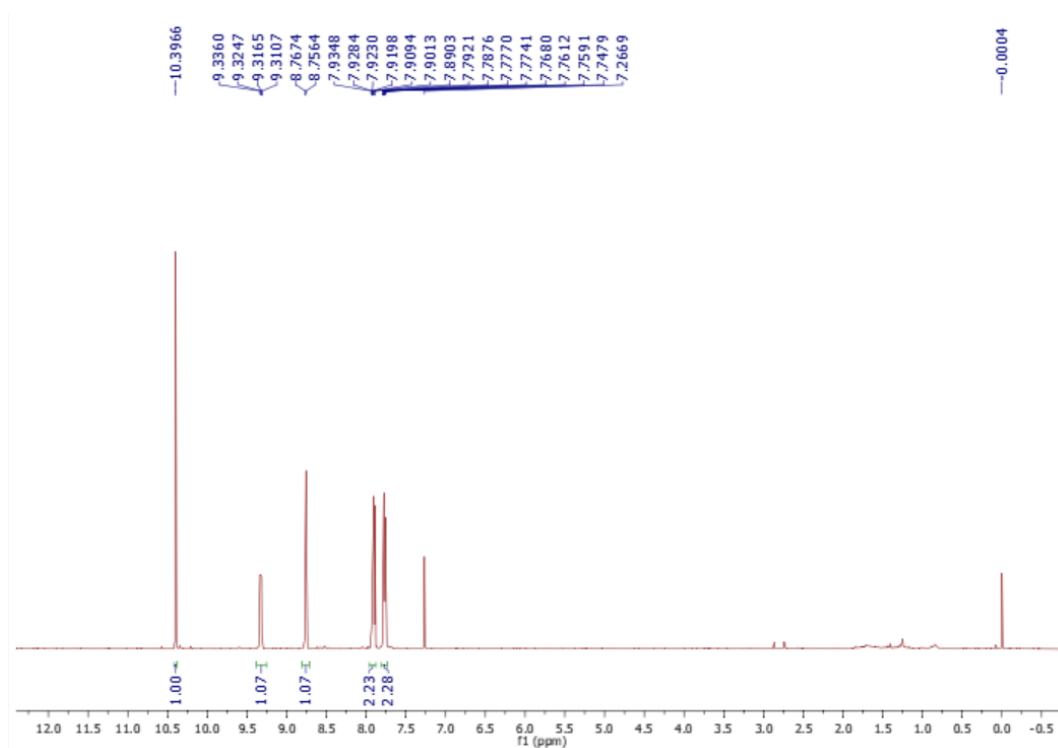

Figure S1. <sup>1</sup>H-NMR spectrum of **4** carbaldehyde (500 MHz, CDCl<sub>3</sub>, 295 K).

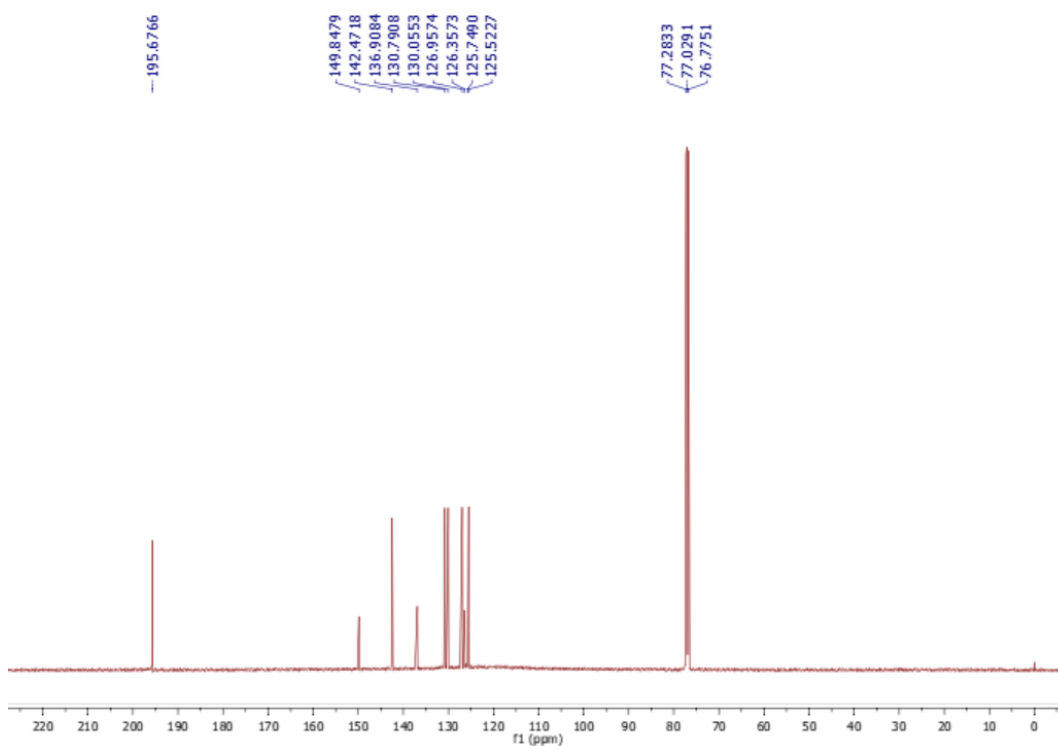

Figure S2. <sup>13</sup>C-NMR spectrum of **4** carbaldehyde (126 MHz, CDCl<sub>3</sub>, 295 K).

# **NMR spectroscopic data of dimethyl 2-(isoquinolin-1-ylmethylene)malonate (**5a**)**

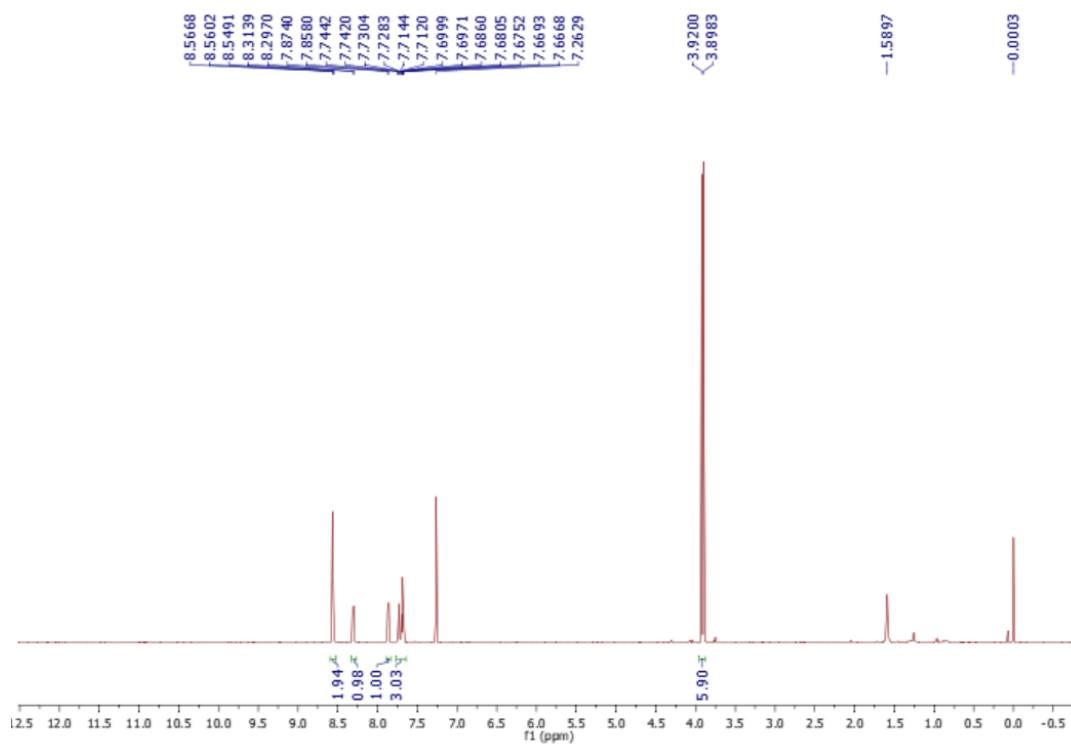

Figure S3. <sup>1</sup>H-NMR spectrum of **5a** diester (500 MHz, CDCl<sub>3</sub>, 295 K).

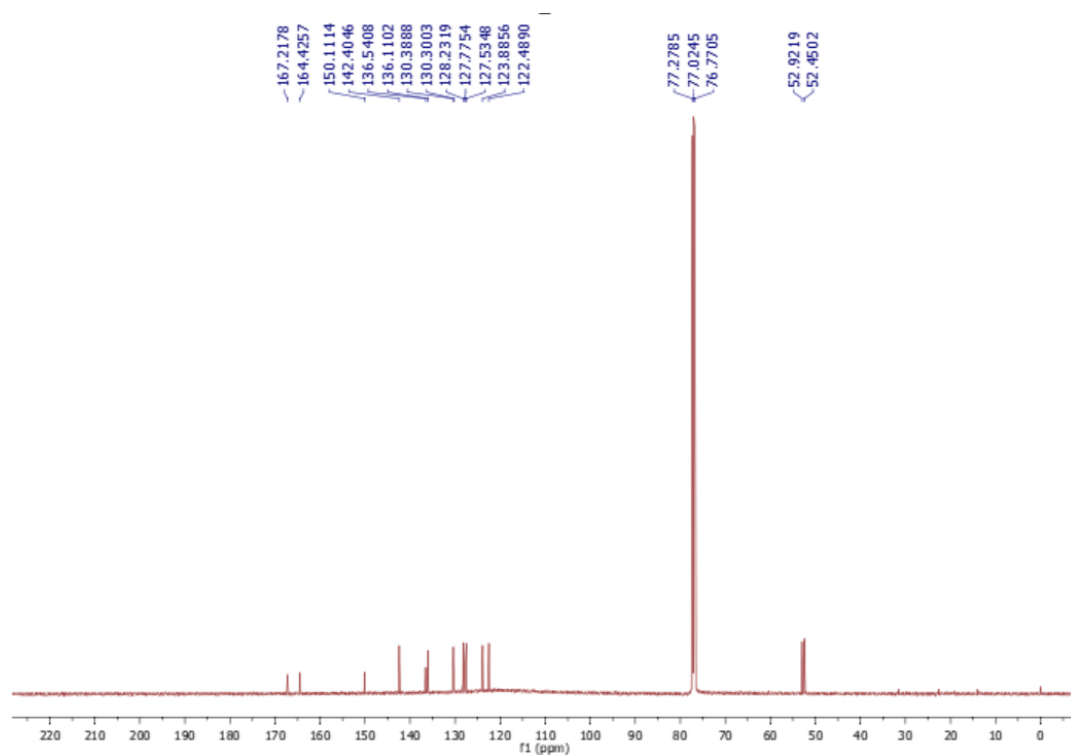

Figure S4. <sup>13</sup>C-NMR spectrum of **5a** diester (126 MHz, CDCl<sub>3</sub>, 295 K).

# **NMR spectroscopic data of diethyl 2-(isoquinolin-1-ylmethylene)malonate (**5b**)**

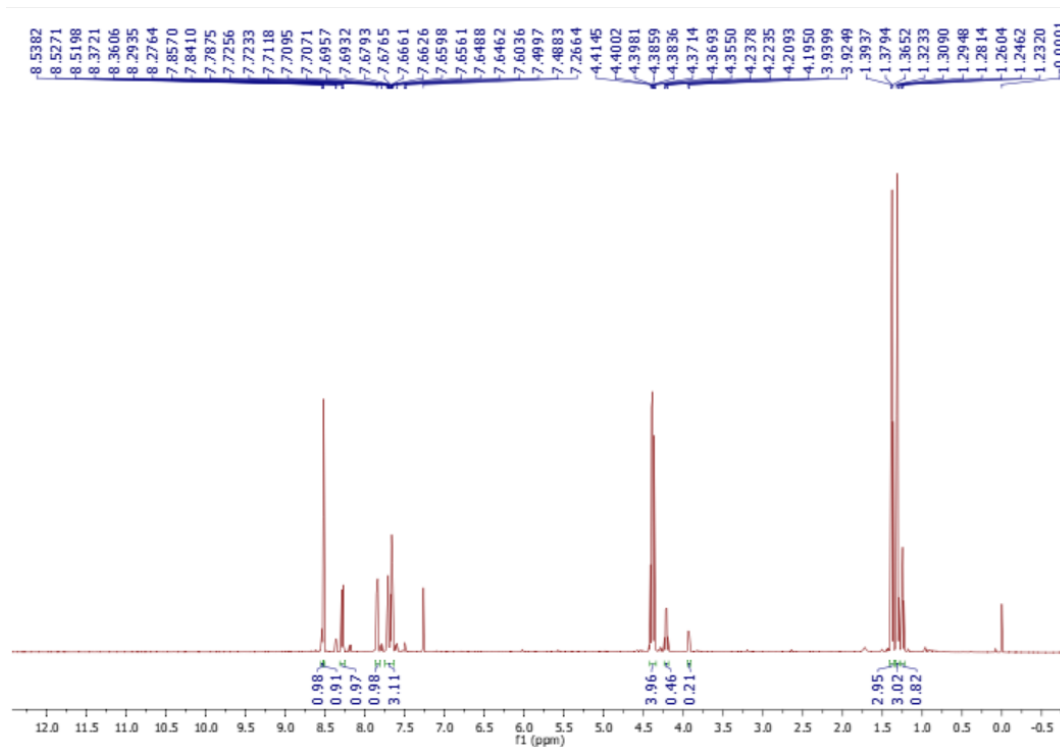

Figure S5. <sup>1</sup>H-NMR spectrum of **5b** diester (500 MHz, CDCl<sub>3</sub>, 295 K).

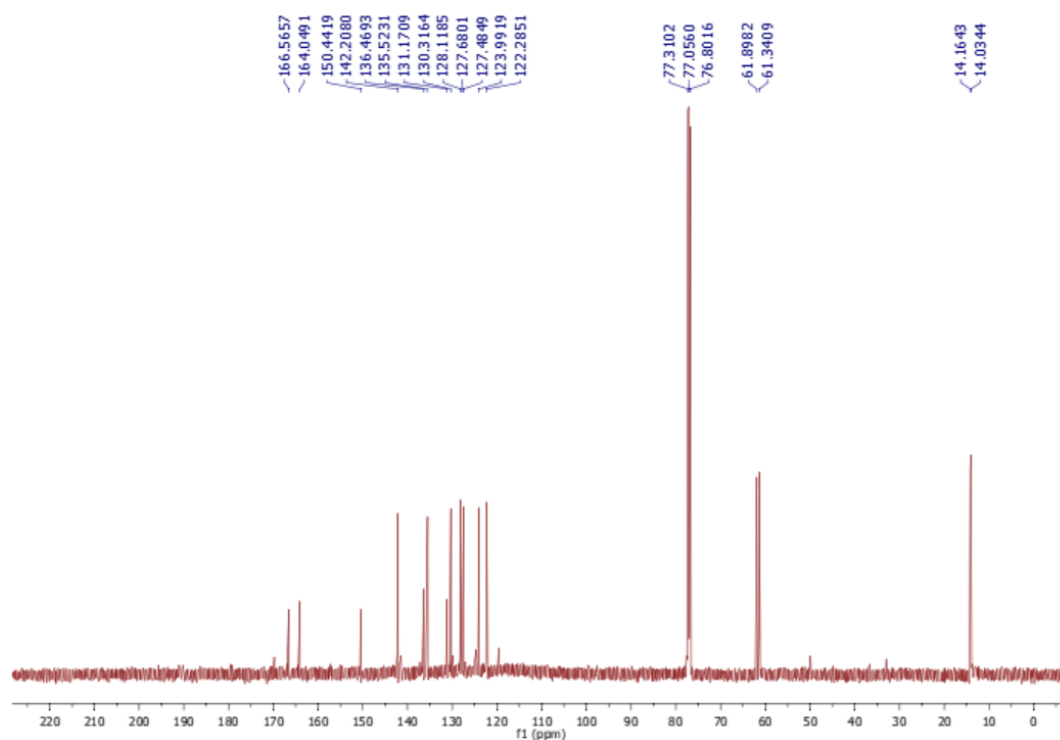

Figure S6. <sup>13</sup>C-NMR spectrum of **5b** diester (126 MHz, CDCl<sub>3</sub>, 295 K).



**NMR spectroscopic data of diisopropyl 2-(isoquinolin-1-ylmethylene)malonate (5c)**

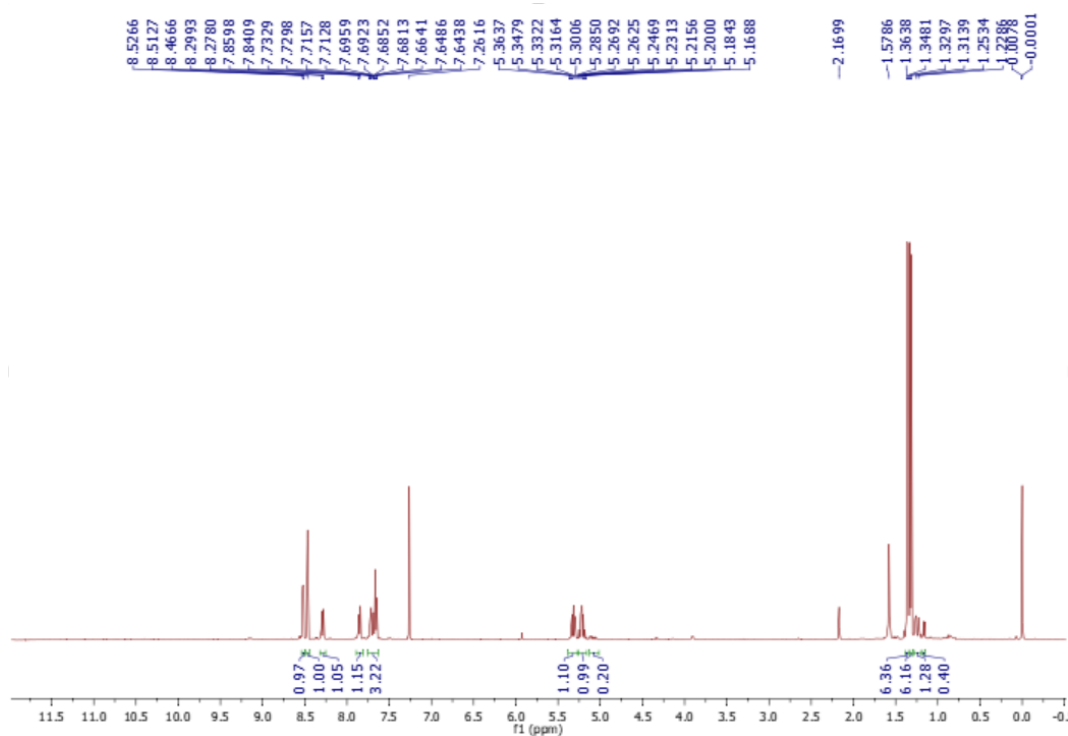

Figure S7. <sup>1</sup>H-NMR spectrum of **5c** diester (500 MHz, CDCl<sub>3</sub>, 295 K).

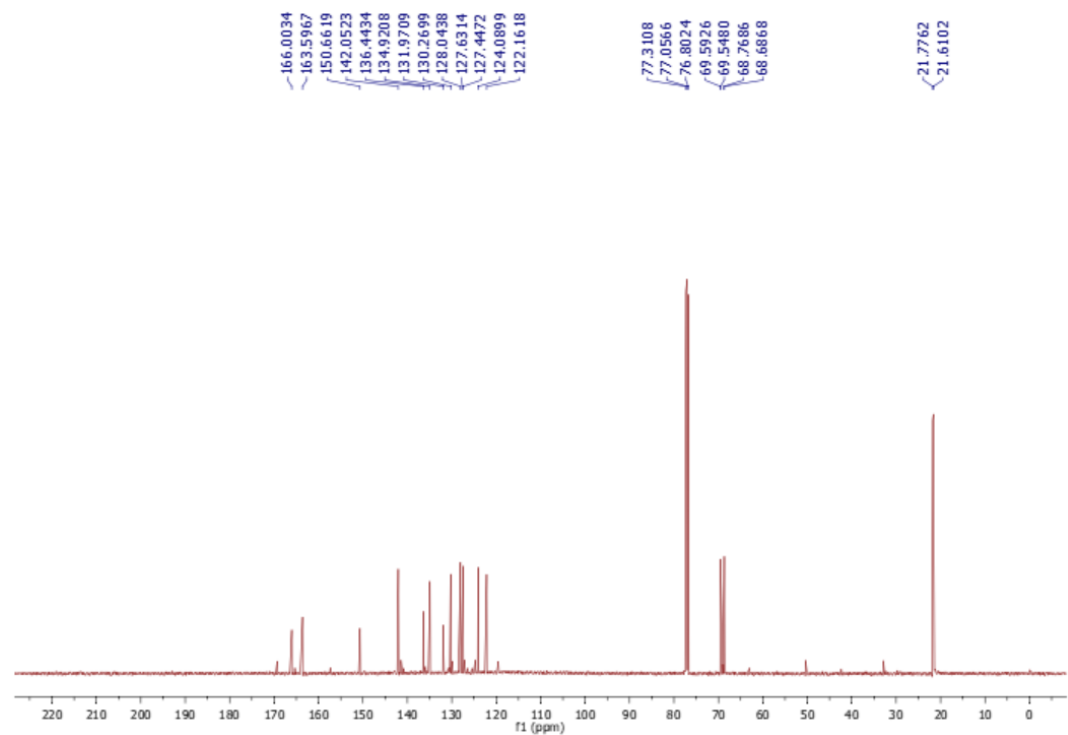

Figure S8. <sup>13</sup>C-NMR spectrum of **5c** diester (126 MHz, CDCl<sub>3</sub>, 295 K).

# NMR spectroscopic data of dibenzyl 2-(isoquinolin-1-ylmethylene)malonate (**5d**)

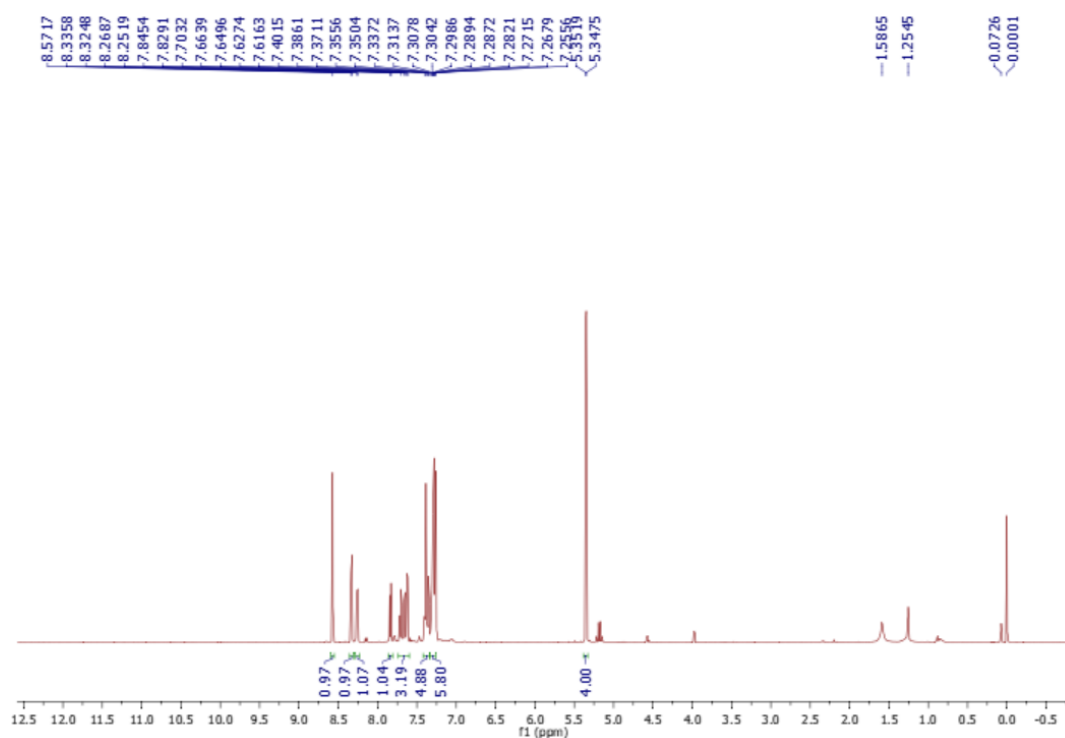

Figure S9. <sup>1</sup>H-NMR spectrum of **5d** diester (500 MHz, CDCl<sub>3</sub>, 295 K).

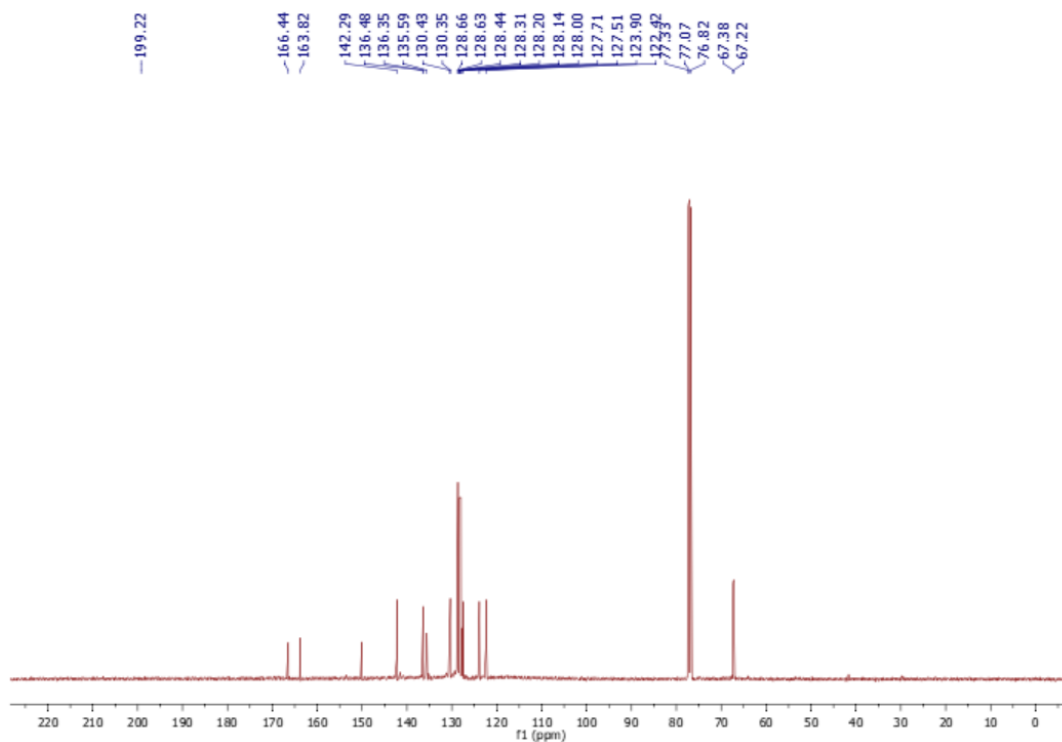

Figure S10. <sup>13</sup>C-NMR spectrum of **5d** diester (126 MHz, CDCl<sub>3</sub>, 295 K).

**NMR spectroscopic data of dimethyl 2-((diphenylphosphorothioyl)(isoquinolin-1-yl)methyl)malonate (**6a**)**

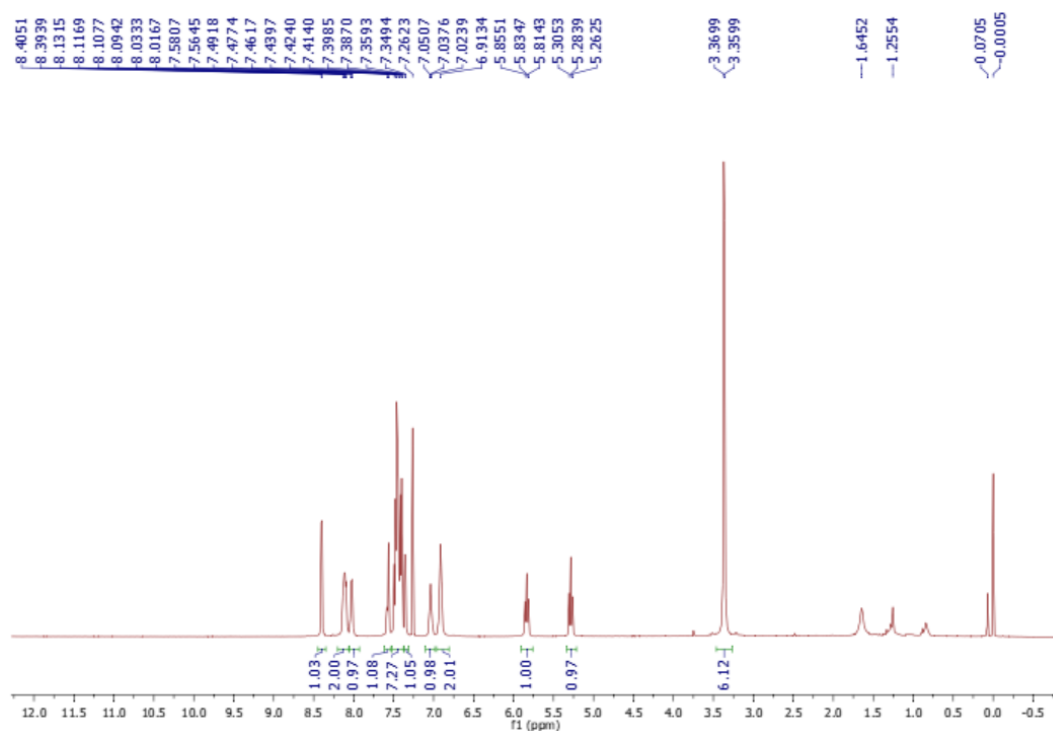

Figure S11.  $^1\text{H}$ -NMR spectrum of **6a** phosphine sulfide (500 MHz,  $\text{CDCl}_3$ , 295 K).

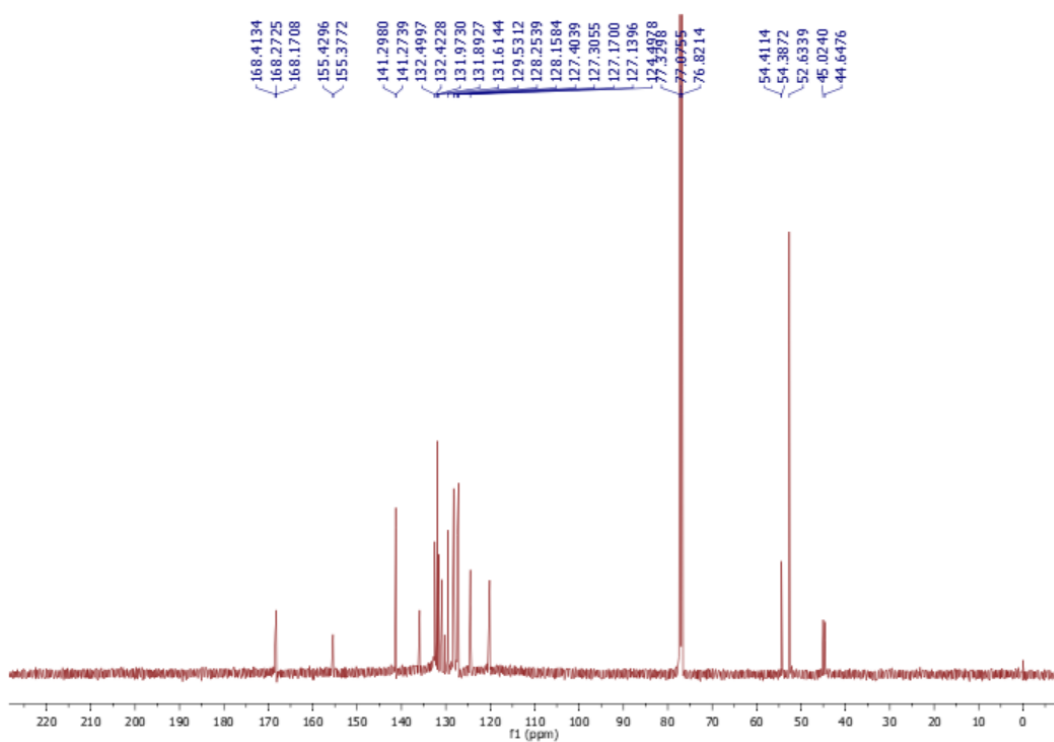

Figure S12.  $^{13}\text{C}$ -NMR spectrum of **6a** phosphine sulfide (126 MHz,  $\text{CDCl}_3$ , 295 K).

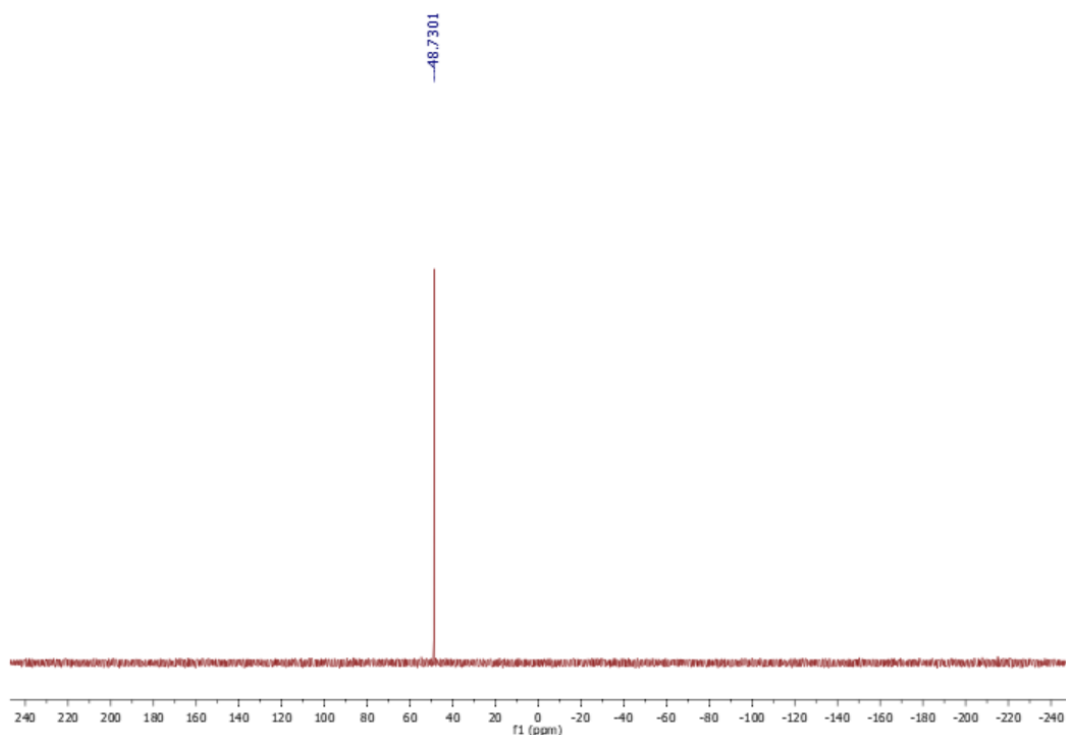

Figure S13. <sup>31</sup>P-NMR spectrum of **6a** phosphine sulfide (202 MHz, CDCl<sub>3</sub>, 295 K).

**NMR spectroscopic data of diethyl 2-((diphenylphosphorothioyl)(isoquinolin-1-yl)methyl)malonate (**6b**)**

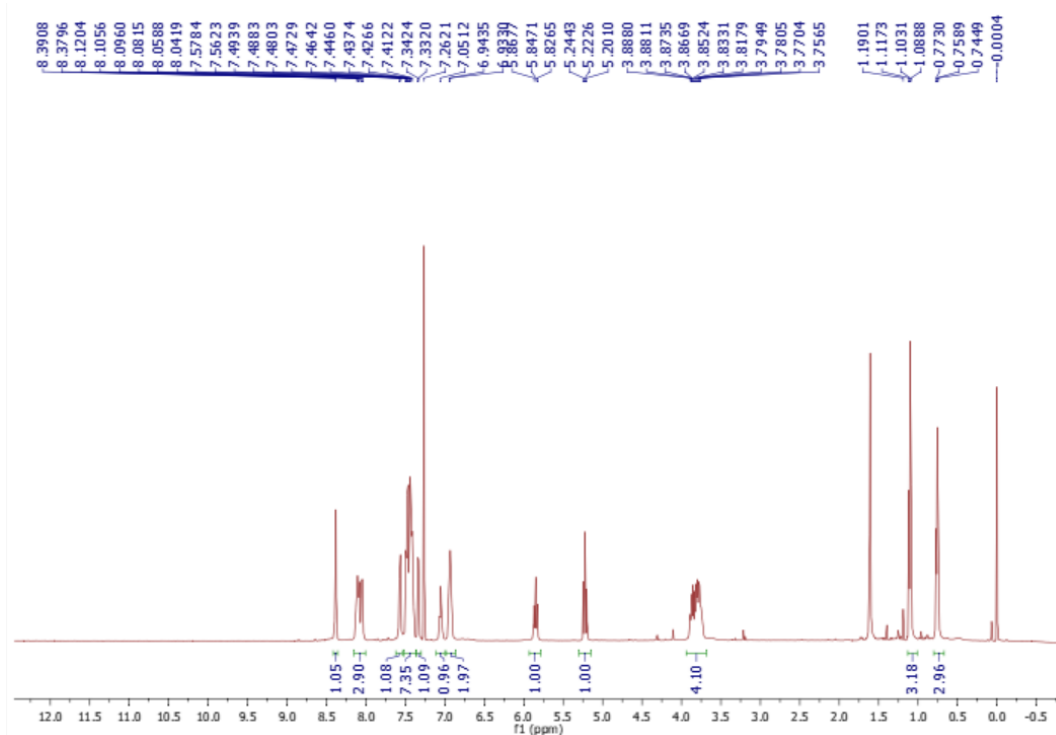

Figure S14. <sup>1</sup>H-NMR spectrum of **6b** phosphine sulfide (500 MHz, CDCl<sub>3</sub>, 295 K).

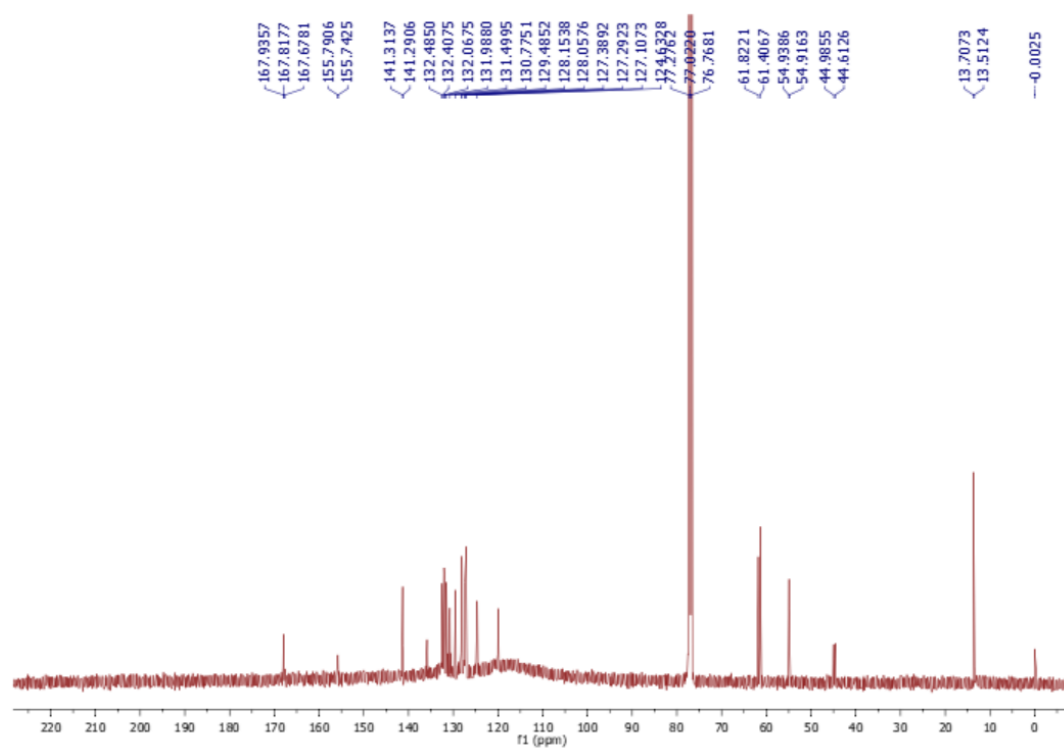

Figure S15. <sup>13</sup>C-NMR spectrum of **6b** phosphine sulfide (126 MHz, CDCl<sub>3</sub>, 295 K).

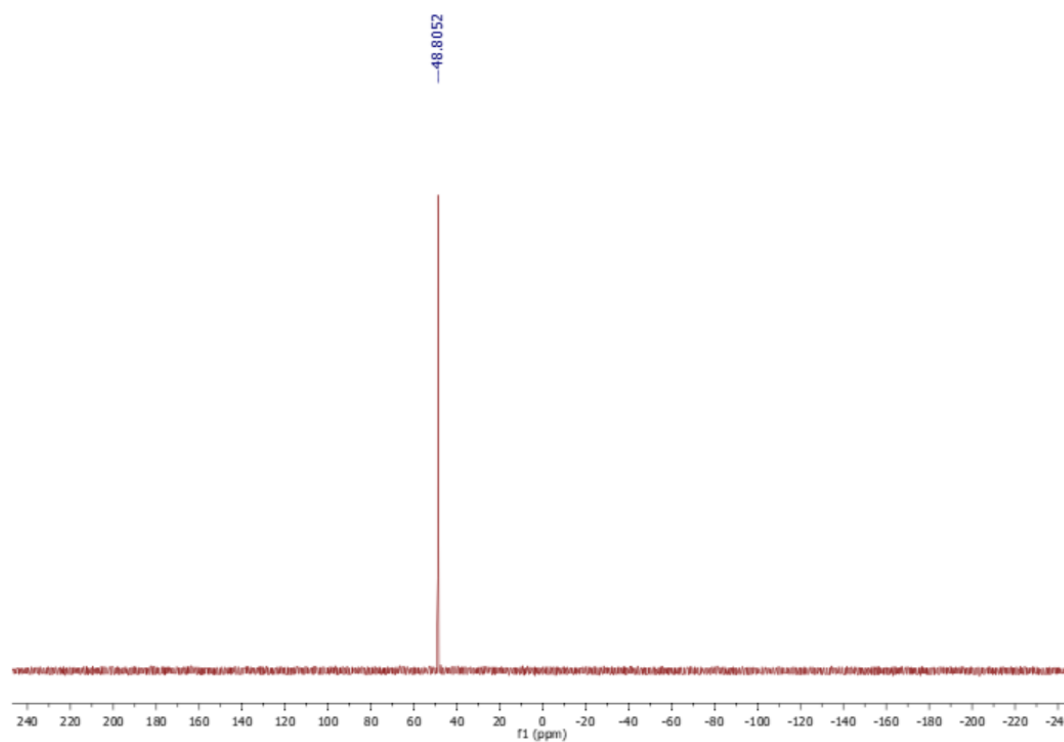

Figure S16. <sup>31</sup>P-NMR spectrum of **6b** phosphine sulfide (202 MHz, CDCl<sub>3</sub>, 295 K).

**NMR spectroscopic data of dibenzyl 2-((diphenylphosphorothioyl)(isoquinolin-1-yl)methyl)malonate (6c)**

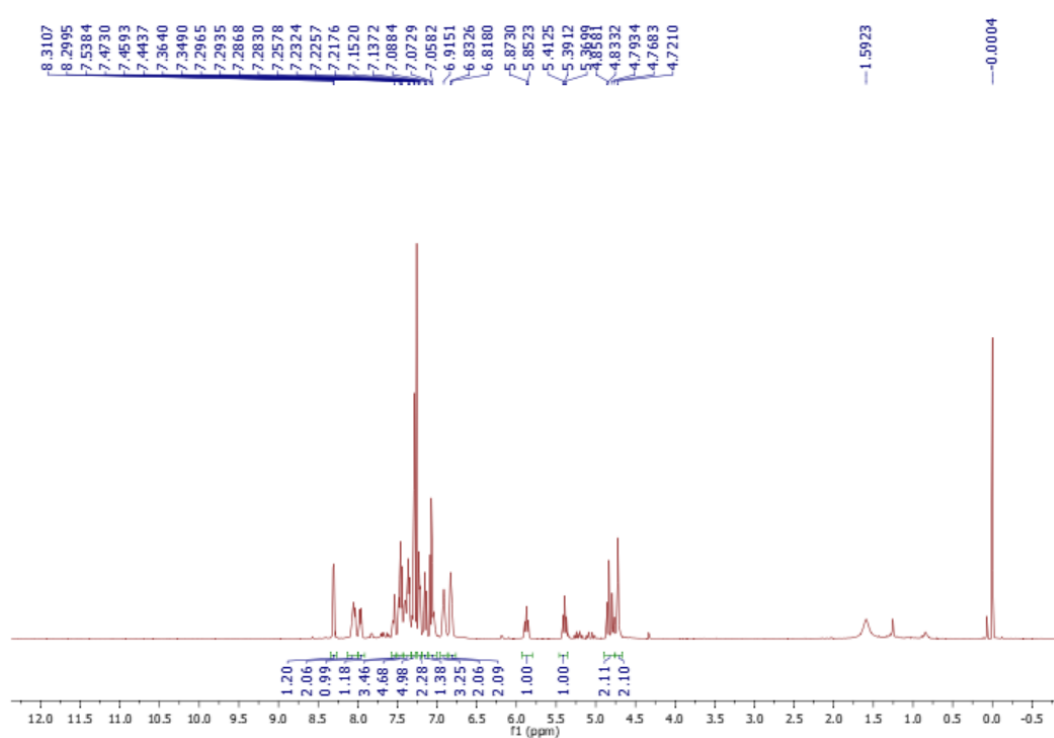

Figure S17. <sup>1</sup>H-NMR spectrum of **6c** phosphine sulfide (500 MHz, CDCl<sub>3</sub>, 295 K).

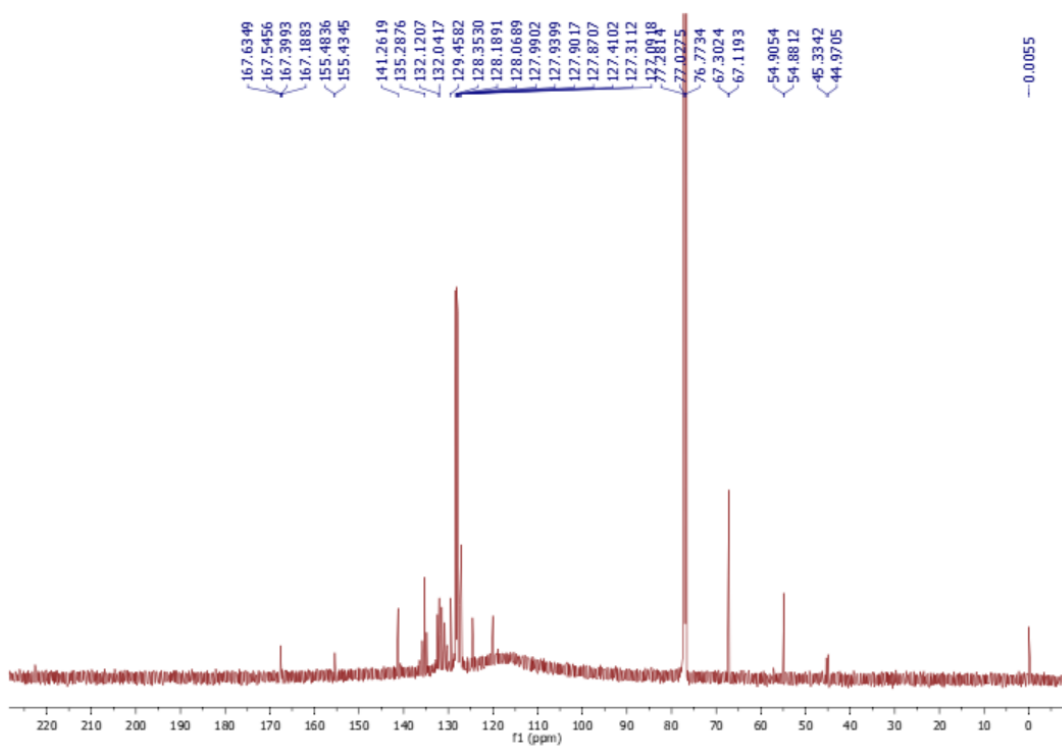

Figure S18. <sup>13</sup>C-NMR spectrum of **6c** phosphine sulfide (126 MHz, CDCl<sub>3</sub>, 295 K).

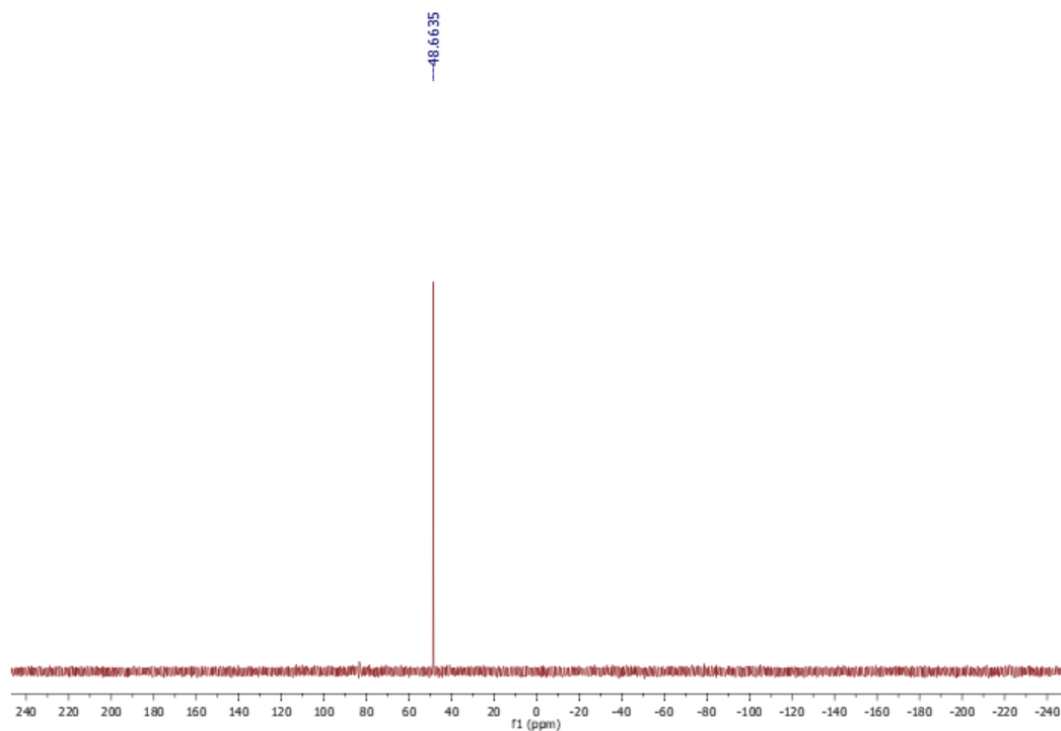

Figure S19.  $^{31}\text{P}$ -NMR spectrum of **6c** phosphine sulfide (202 MHz,  $\text{CDCl}_3$ , 295 K).

**NMR spectroscopic data of (*R*)-( $\kappa^2\text{-P,N}$ )-(dimethyl 2-  
((diphenylphosphaneyl)(isoquinolin-1-yl)methyl)malonate)-dichloropalladium(II)  
(*R*)-9)**

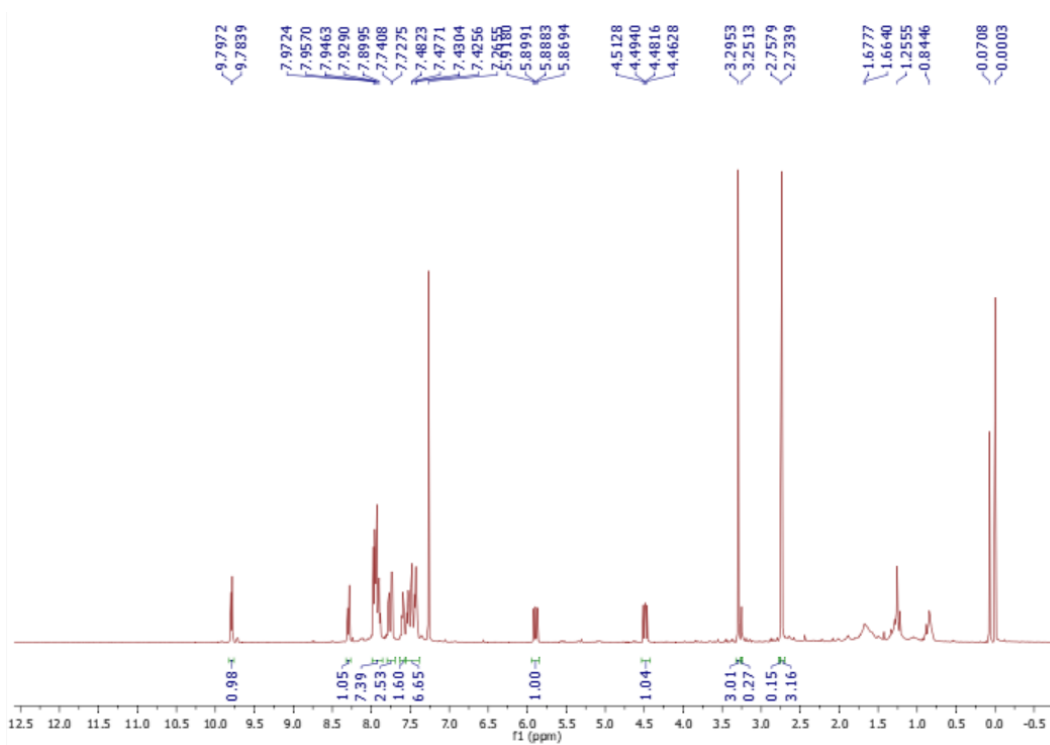

Figure S20.  $^1\text{H}$ -NMR spectrum of palladium complex (*R*)-9 (500 MHz,  $\text{CDCl}_3$ , 295 K).

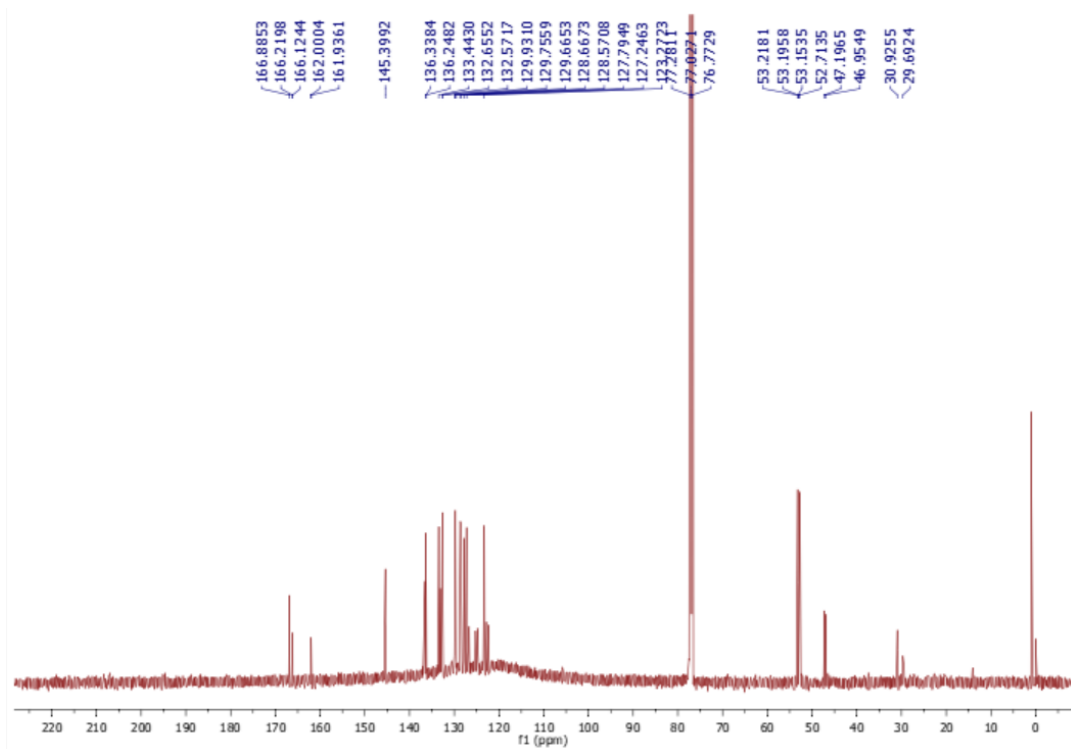

Figure S21.  $^{13}\text{C}$ -NMR spectrum of palladium complex (*R*)-**9** (126 MHz,  $\text{CDCl}_3$ , 295 K).

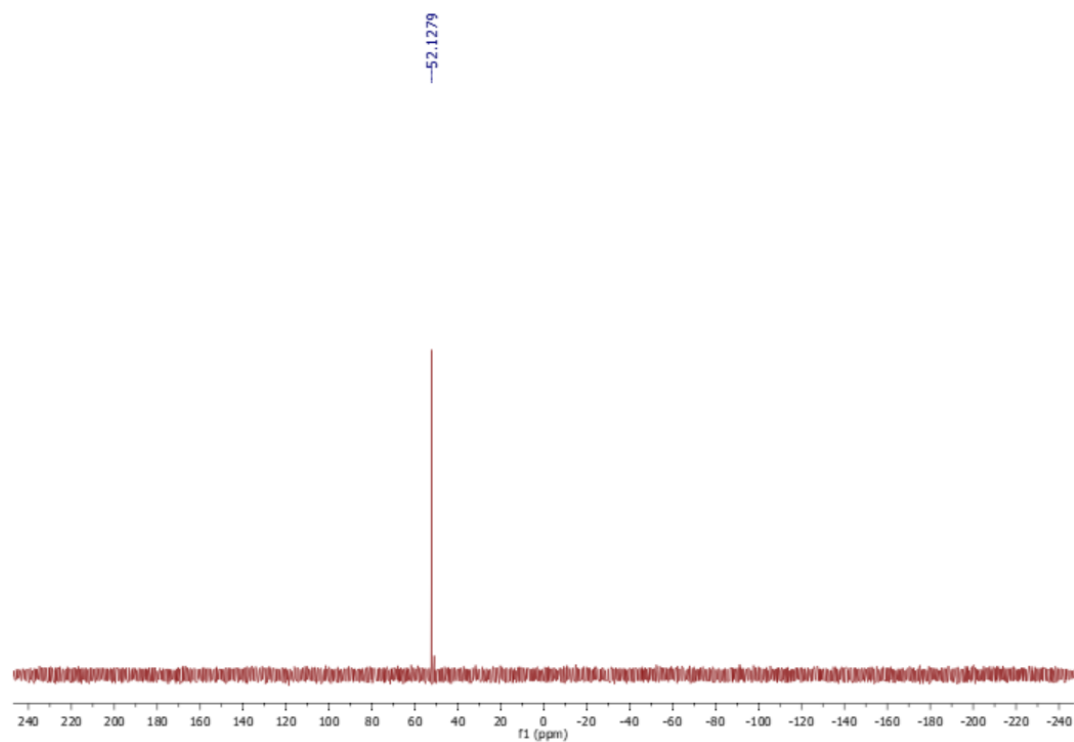

Figure S22.  $^{31}\text{P}$ -NMR spectrum of palladium complex (*R*)-**9** (202 MHz,  $\text{CDCl}_3$ , 295 K).



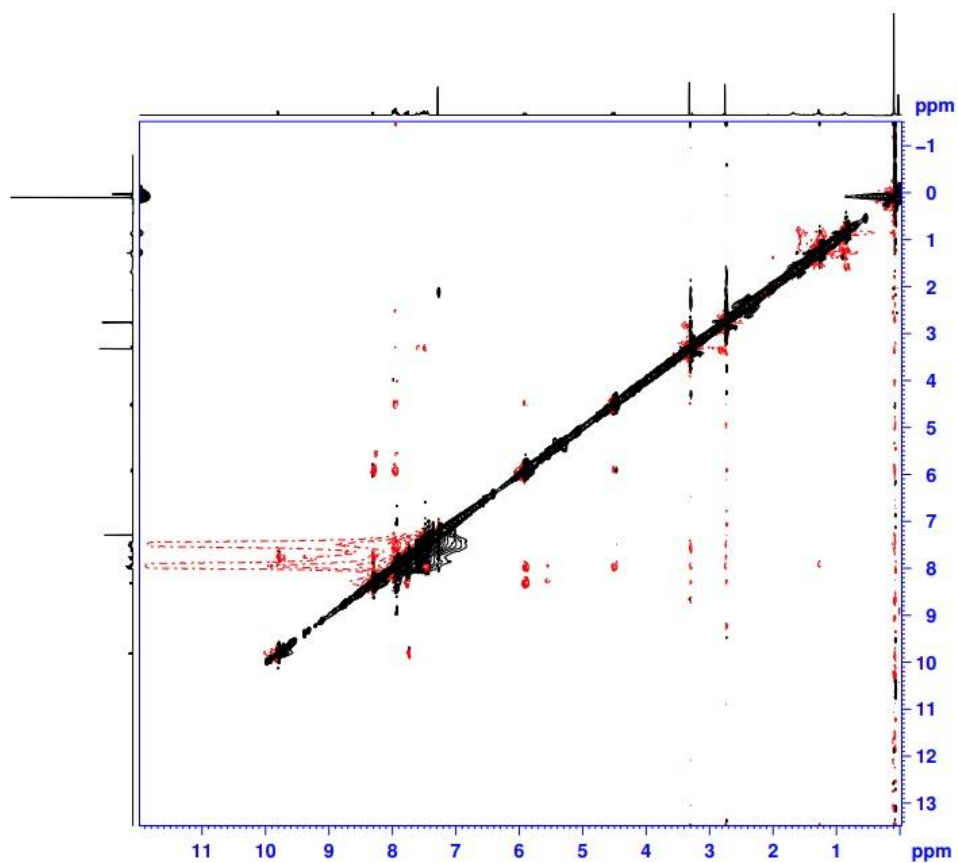

Figure S23.  $^1\text{H}$ - $^1\text{H}$  ROESY correlation spectrum of palladium complex (R)-9.

**NMR spectroscopic data of (*R*)-( $\kappa^2$ -P,N)-(dimethyl 2-  
((diphenylphosphaneyl)(isoquinolin-1-yl)methyl)malonate)-dichloroplatinum(II)  
(*R*)-10**

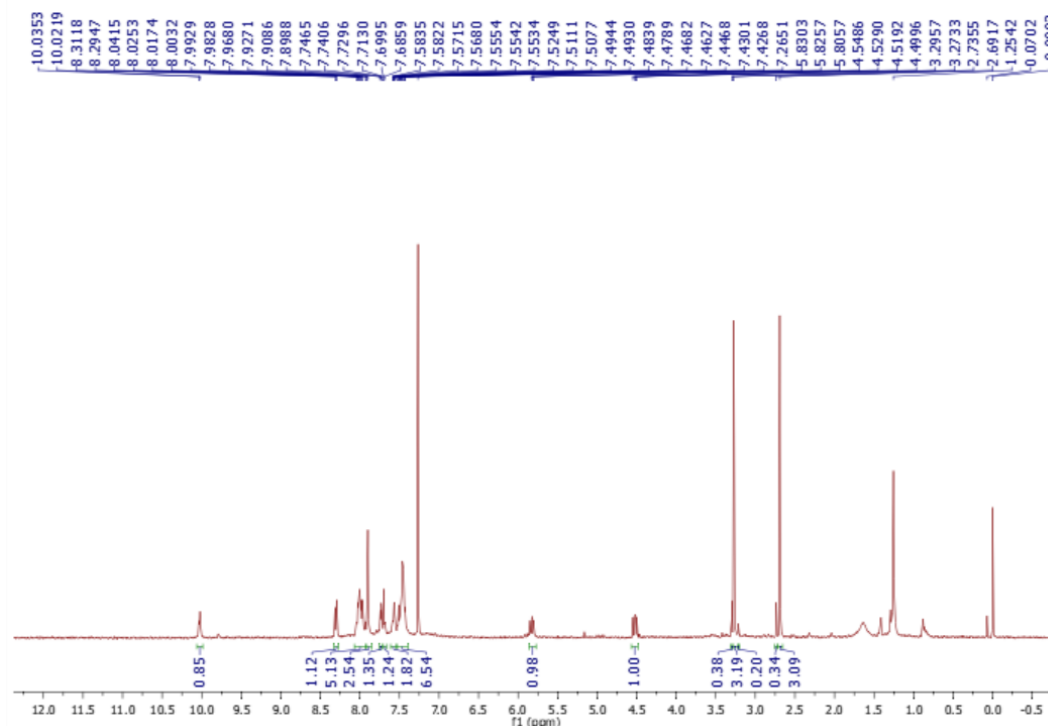

Figure S24.  $^1\text{H}$ -NMR spectrum of platinum complex (*R*)-10 (500 MHz,  $\text{CDCl}_3$ , 295 K).

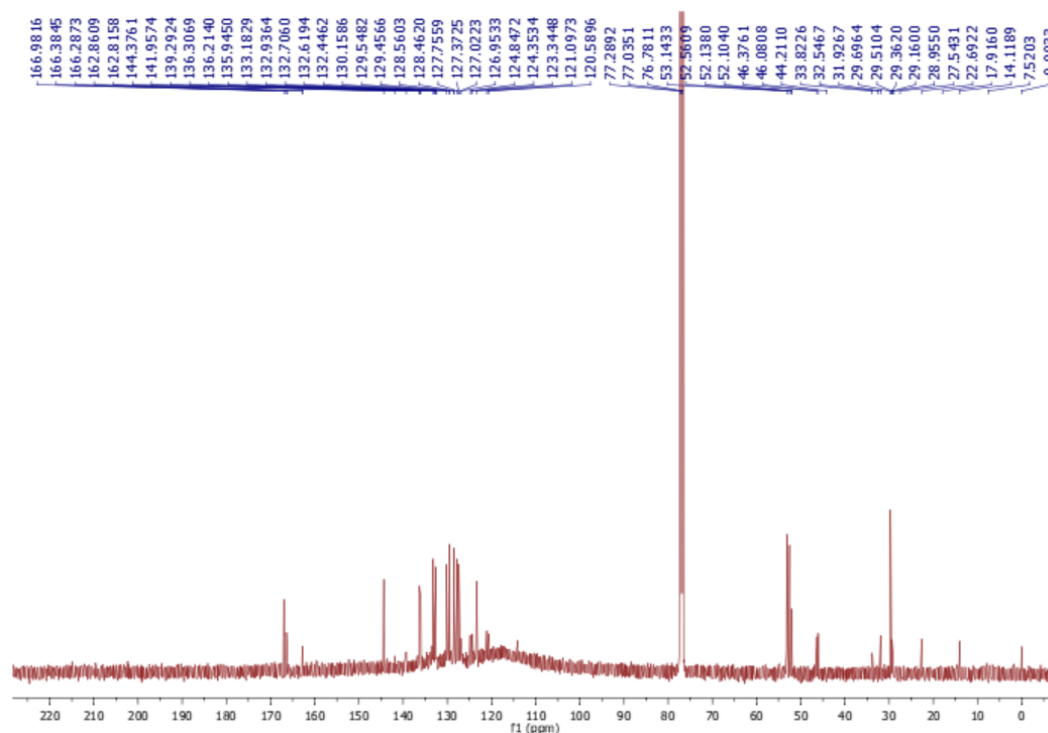

Figure S25.  $^{13}\text{C}$ -NMR spectrum of platinum complex (*R*)-10 (126 MHz,  $\text{CDCl}_3$ , 295 K).

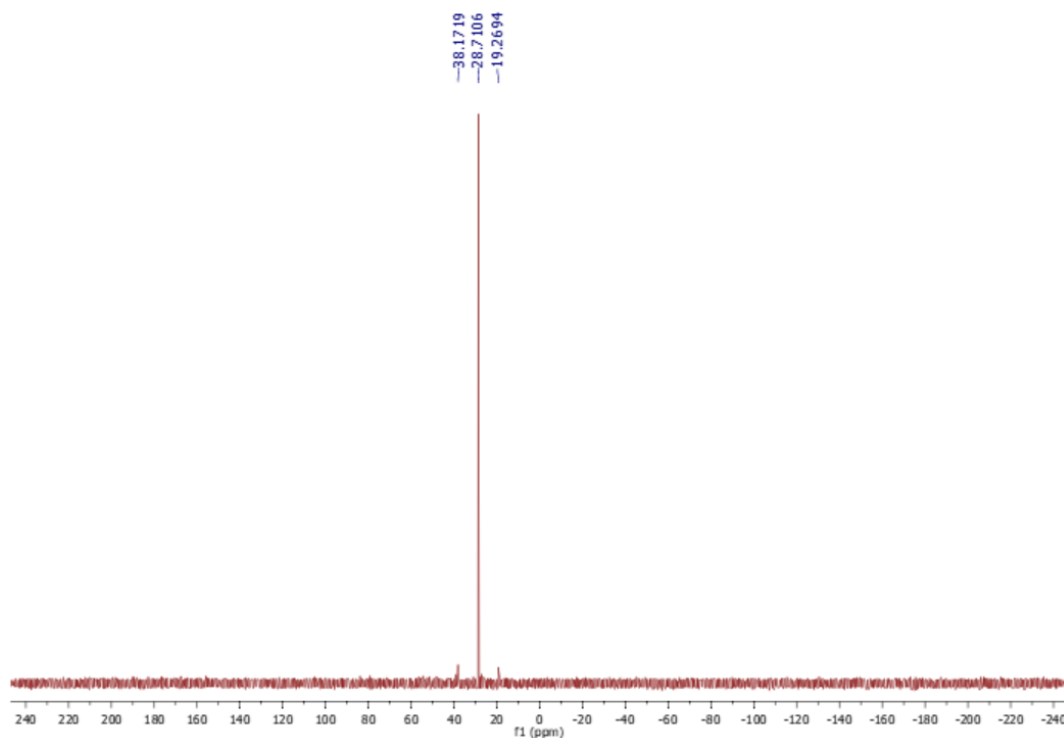

Figure S26.  $^{31}\text{P}$ -NMR spectrum of platinum complex (*R*)-**10** (202 MHz,  $\text{CDCl}_3$ , 295 K).

**NMR spectroscopic data of  $[(\kappa^2\text{-P,N})\text{-(dimethyl 2-((diphenylphosphaneyl)(isoquinolin-1-yl)methyl)malonate))][(1,2,5,6-\eta)(1Z,5Z)\text{-cycloocta-1,5-diene}]$ -rhodium(I) tetrafluoroborate (**13**)**

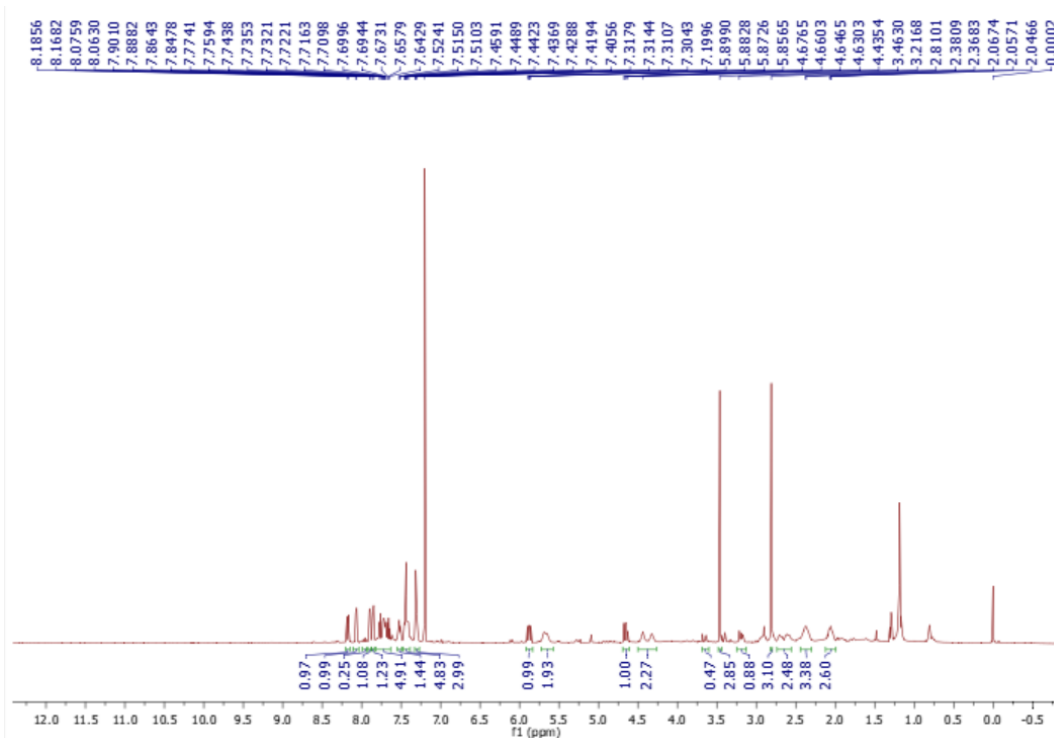

Figure S27.  $^1\text{H}$ -NMR spectrum of rhodium complex **13** (500 MHz,  $\text{CDCl}_3$ , 295 K).

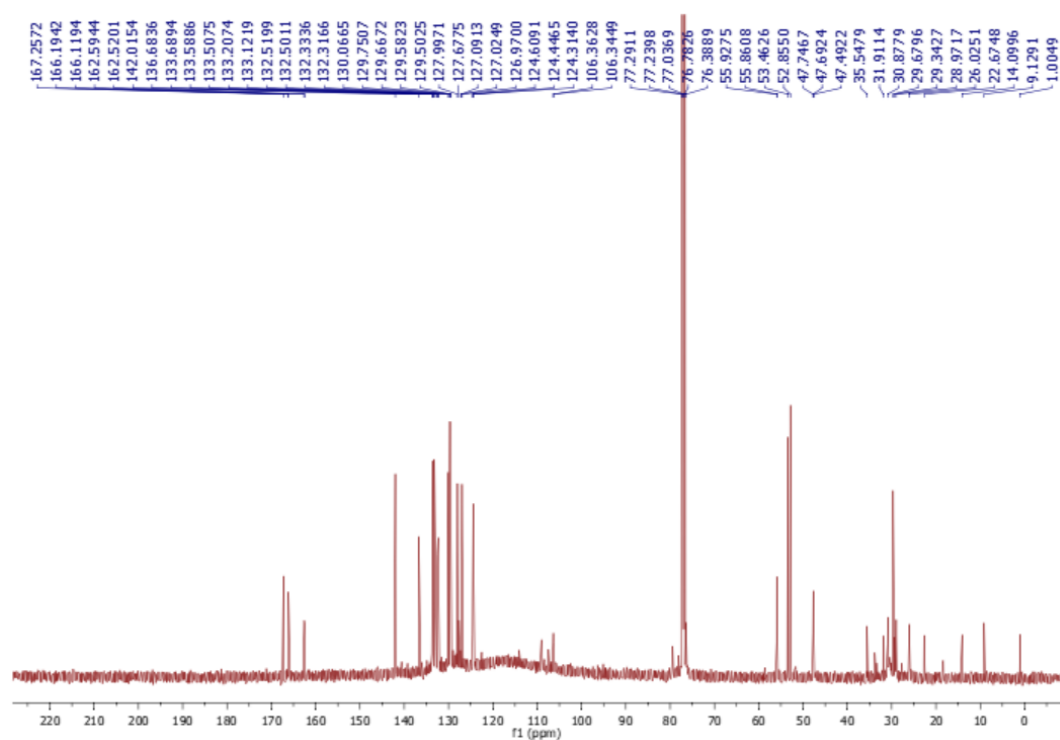

Figure S28.  $^{13}\text{C}$ -NMR spectrum of rhodium complex **13** (126 MHz,  $\text{CDCl}_3$ , 295 K).

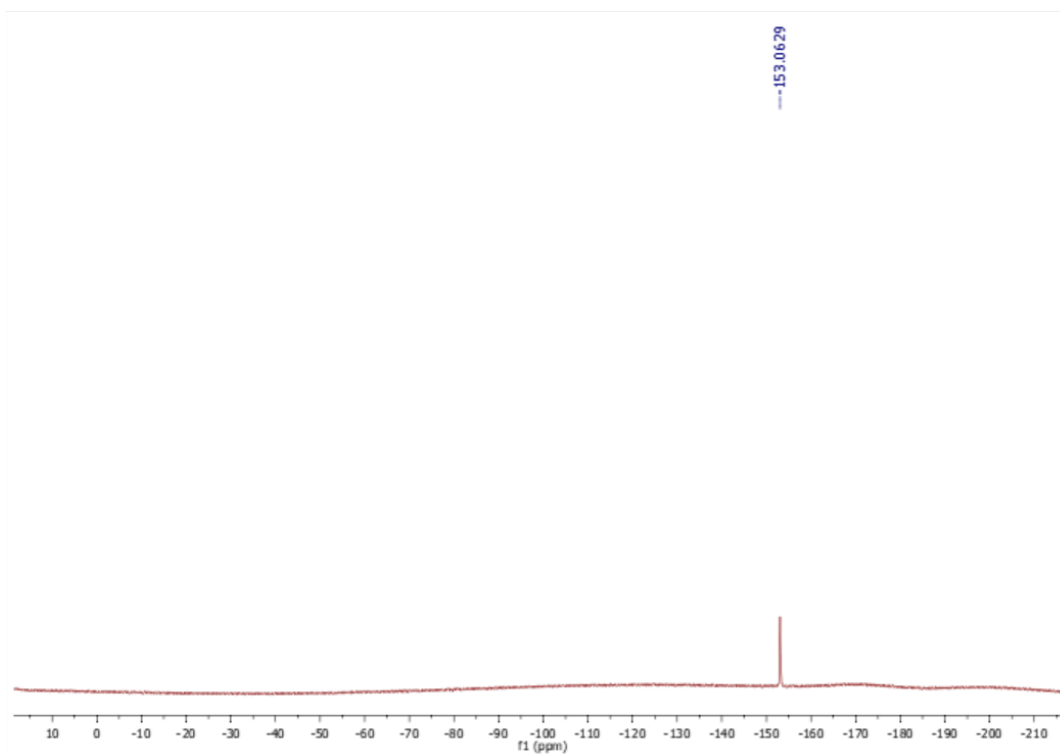

Figure S29.  $^{19}\text{F}$ -NMR spectrum of rhodium complex **13** (376 MHz,  $\text{CDCl}_3$ , 295 K).

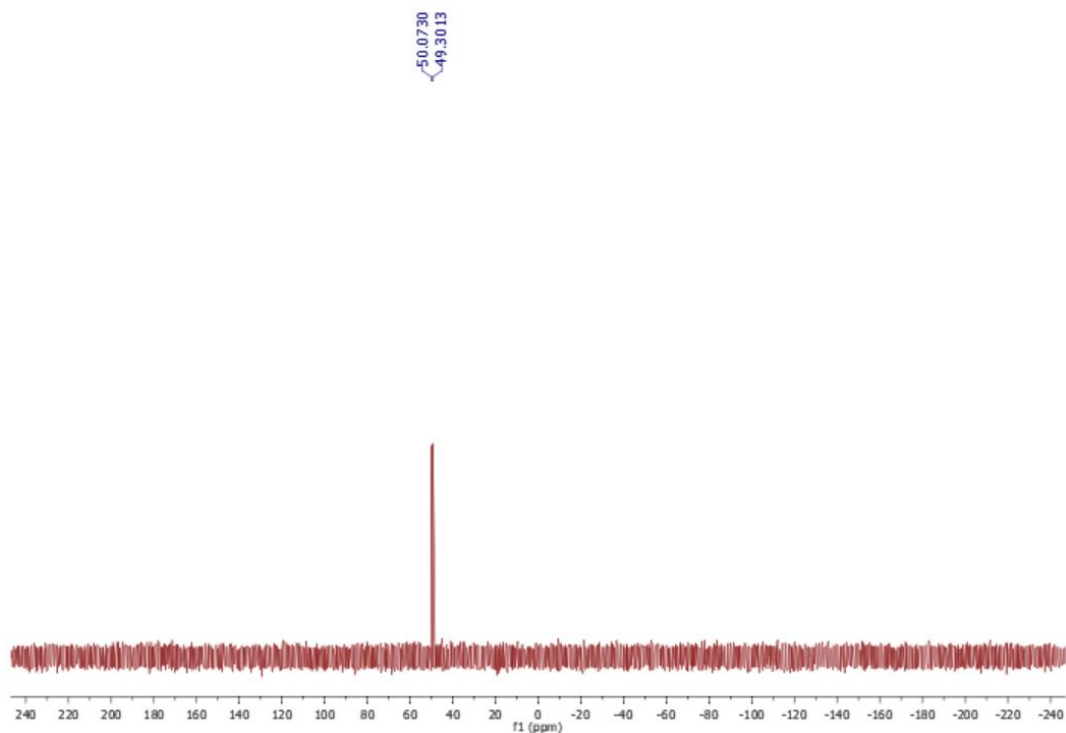

Figure S30.  $^{31}\text{P}$ -NMR spectrum of rhodium complex **13** (202 MHz,  $\text{CDCl}_3$ , 295 K).

**NMR spectroscopic data of  $[(\kappa^2\text{-P,N})\text{-(dimethyl 2-((diphenylphosphaneyl)(isoquinolin-1-yl)methyl)malonate))][(1,2,5,6-\eta)(1Z,5Z)\text{-cycloocta-1,5-diene}]\text{-iridium(I) tetrafluoroborate (14)}$**

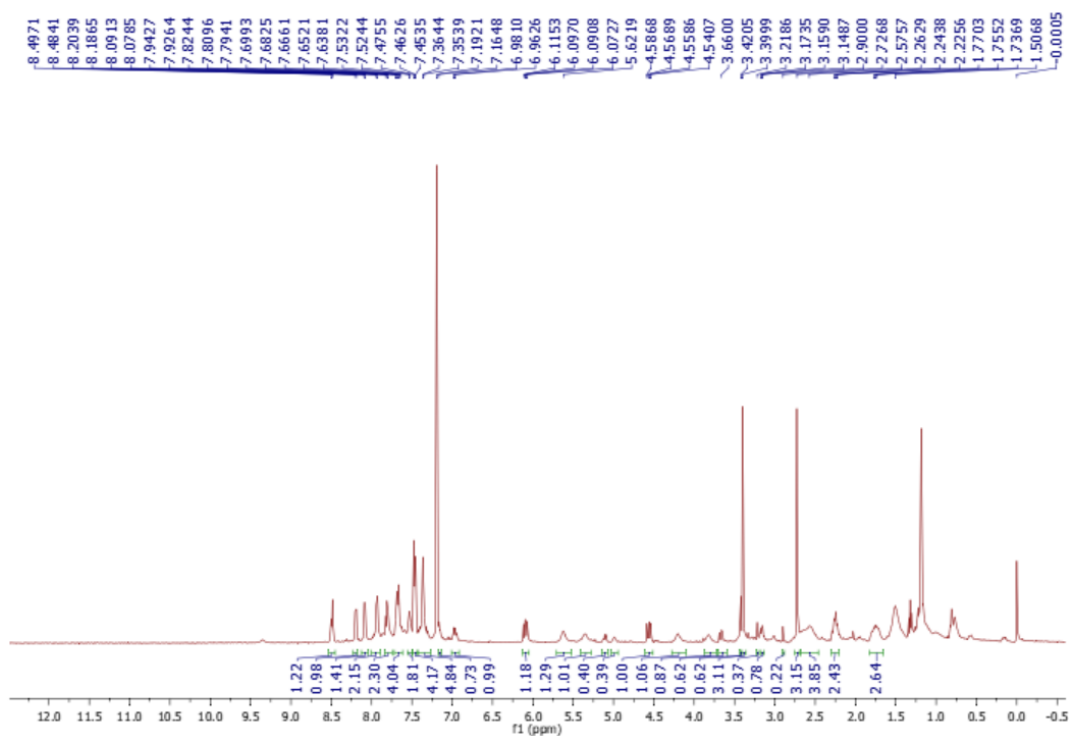

Figure S31.  $^1\text{H}$ -NMR spectrum iridium complex **14** (500 MHz,  $\text{CDCl}_3$ , 295 K).

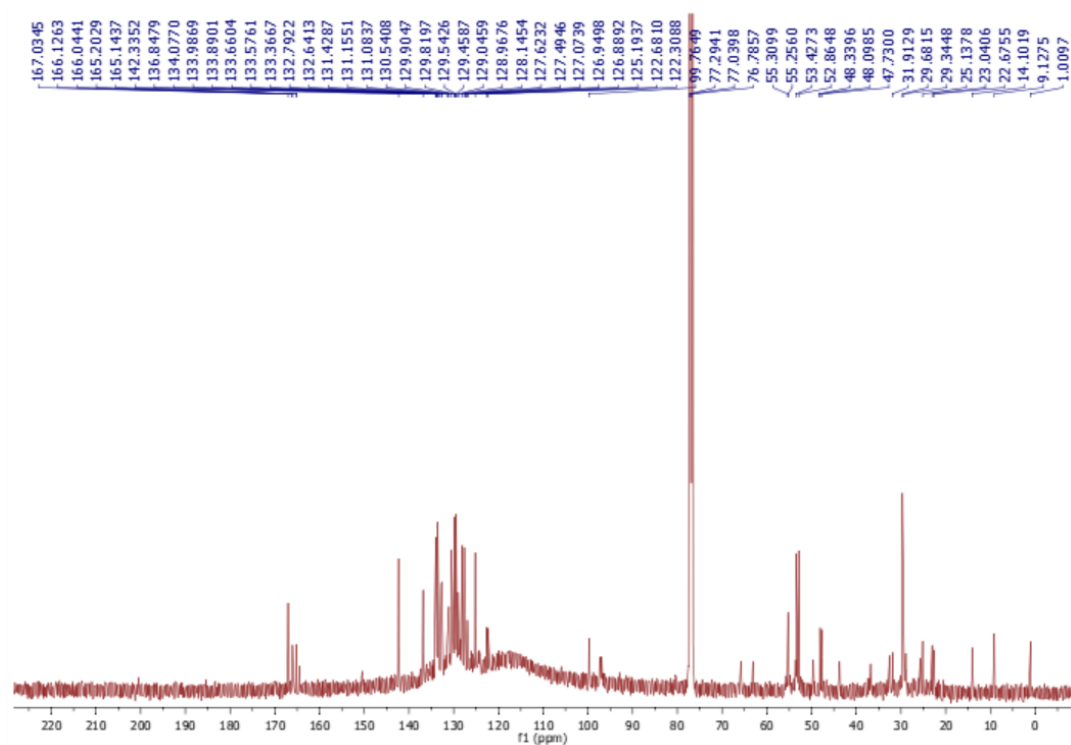

Figure S32.  $^{13}\text{C}$ -NMR spectrum of iridium complex **14** (126 MHz,  $\text{CDCl}_3$ , 295 K).

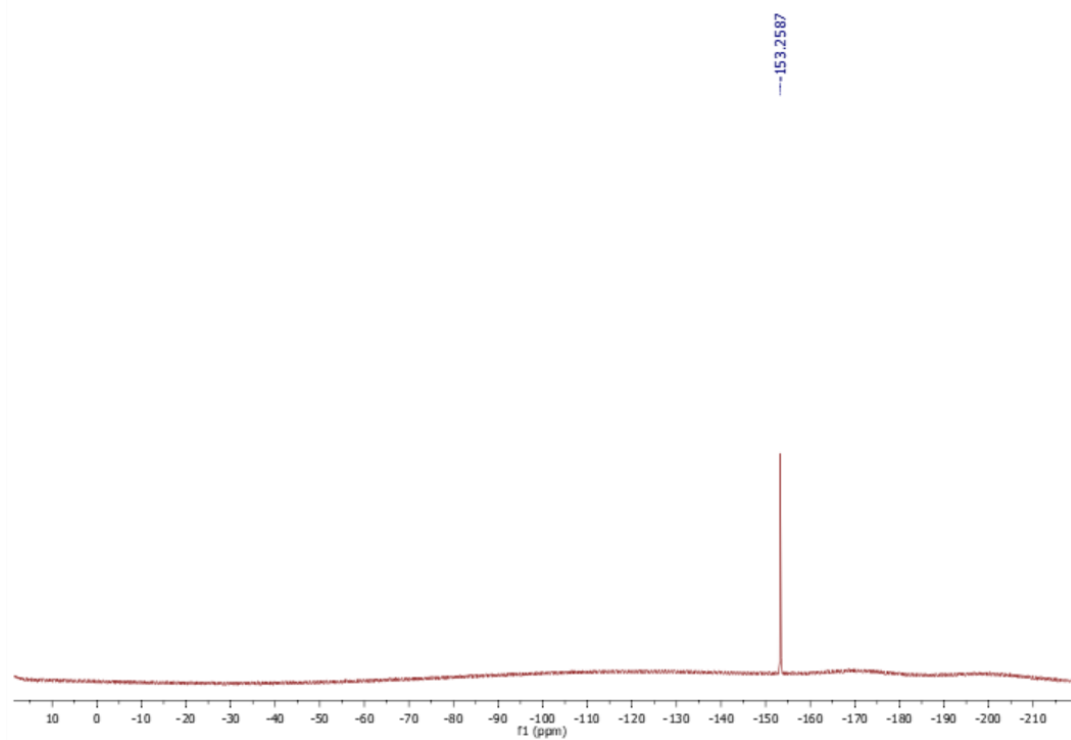

Figure S33.  $^{19}\text{F}$ -NMR spectrum of iridium complex **14** (376 MHz,  $\text{CDCl}_3$ , 295 K).

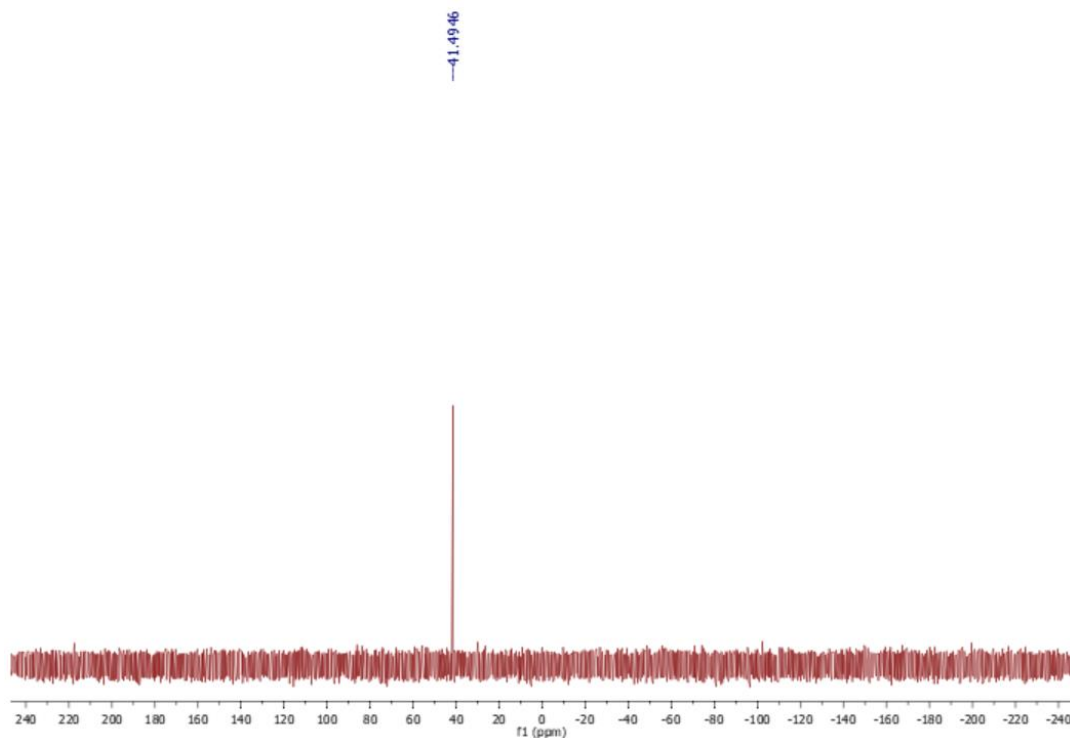

Figure S34.  $^{31}\text{P}$ -NMR spectrum of iridium complex **14** (202 MHz,  $\text{CDCl}_3$ , 295 K).

**NMR spectroscopic data of {(R)-( $\kappa^2\text{-C}^2,\text{N}$ )-1-[1-(dimethylamino)ethyl]naphthyl}-  
{(R)-( $\kappa^2\text{-P,N}$ )-(dimethyl 2-((diphenylphosphaneyl)(isoquinolin-1-yl)methyl)malonate)}-palladium(II) perchlorate ((R,R)-**22**)**

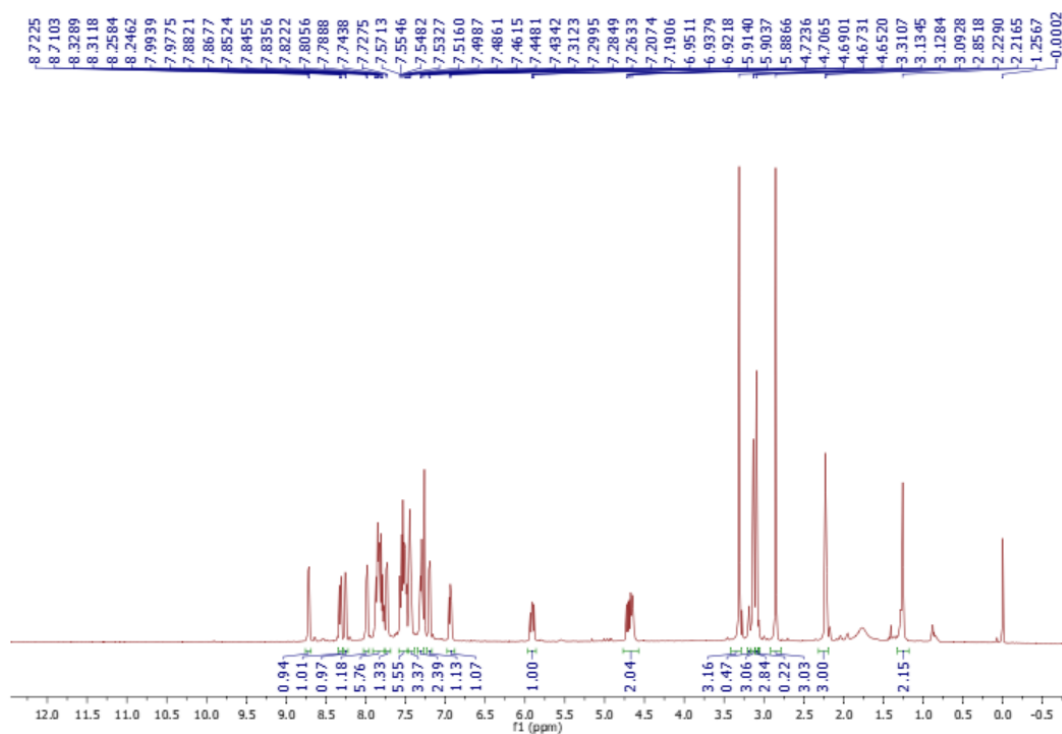

Figure S35.  $^1\text{H}$ -NMR spectrum of palladium complex (R,R)-**22** (500 MHz,  $\text{CDCl}_3$ , 295 K).

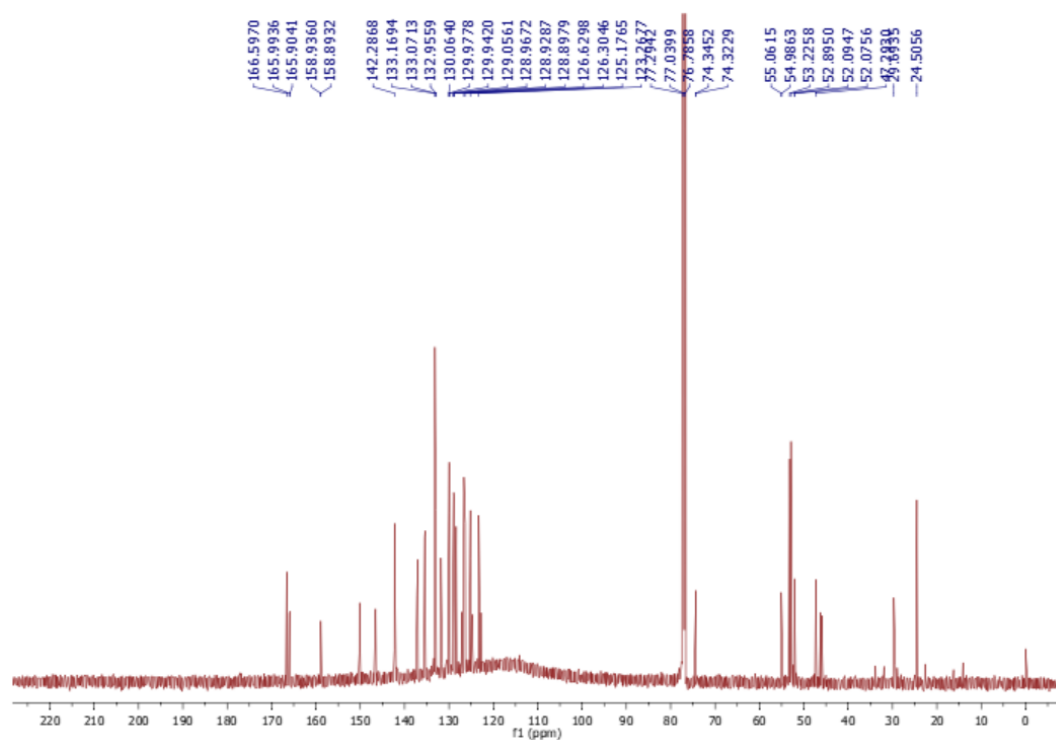

Figure S36.  $^{13}\text{C}$ -NMR spectrum of palladium complex (*R,R*)-**22** (126 MHz,  $\text{CDCl}_3$ , 295 K).

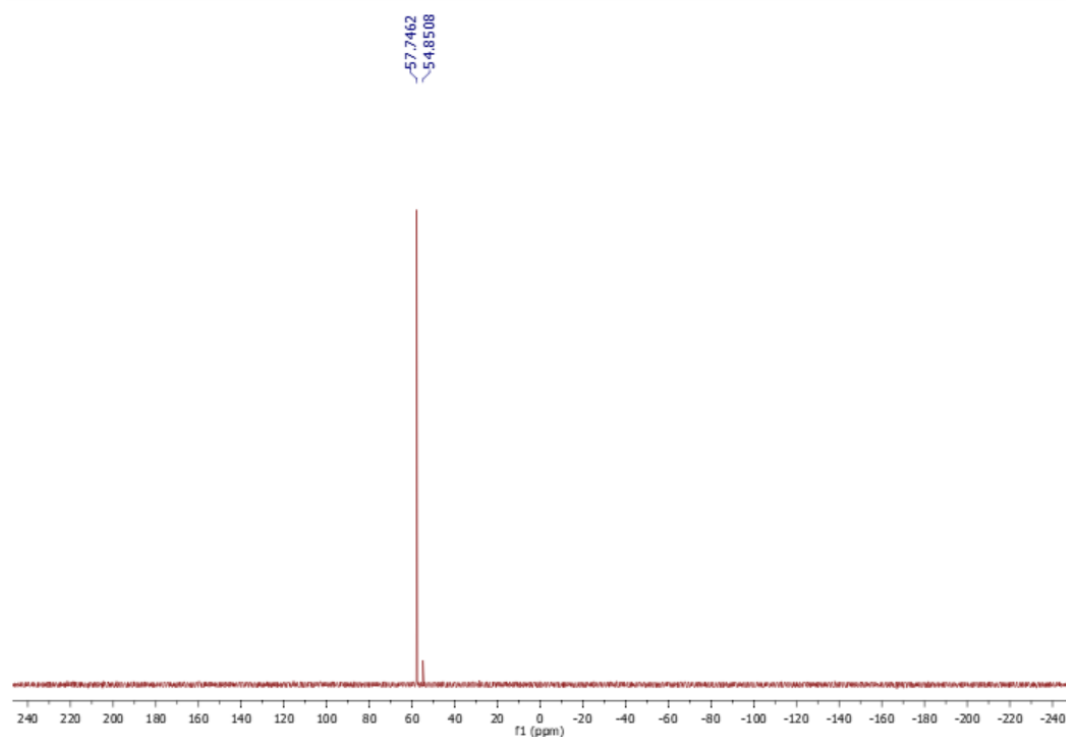

Figure S37.  $^{31}\text{P}$ -NMR spectrum of palladium complex (*R,R*)-**22** (202 MHz,  $\text{CDCl}_3$ , 295 K).



## 5. HPLC chromatograms

The determination of ee for **6a** and **6c** (for Entries 1-16 and 19) was performed on Agilent 1200 Series chromatograph with Daicel Chiralpack ID column in *n*-hexane/isopropanol 85:15 solvent system at 25 °C with 1.2 ml/min flow rate. Injected volume: 20  $\mu$ L in MeOH/DCM.

**Table 1 Entry 1**

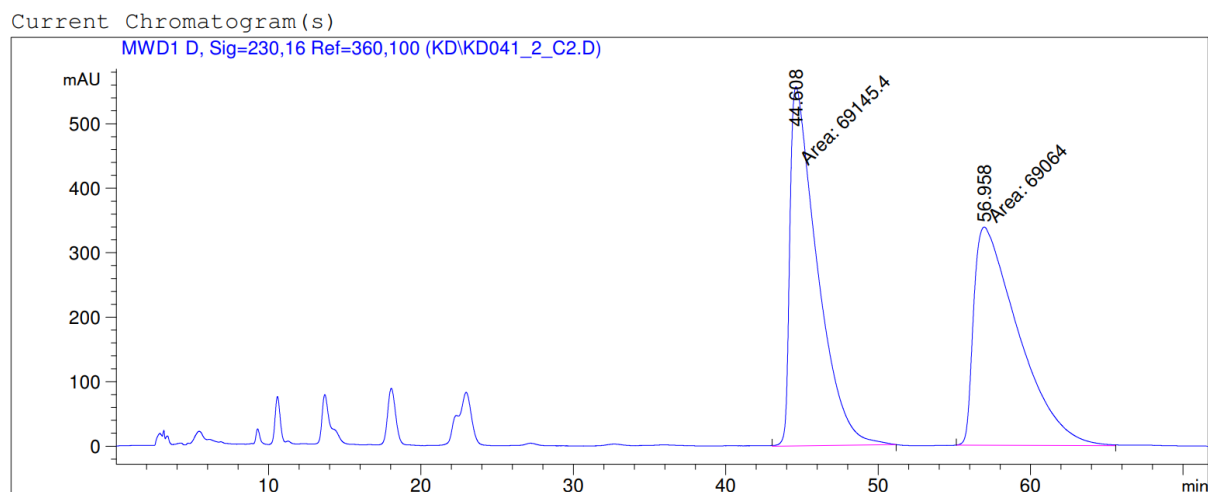

Signal 4: MWD1 D, Sig=230,16 Ref=360,100

| Peak # | RetTime [min] | Type | Width [min] | Area [mAU*s] | Height [mAU] | Area %  |
|--------|---------------|------|-------------|--------------|--------------|---------|
| 1      | 44.608        | MM   | 2.0689      | 6.91454e4    | 557.02429    | 50.0294 |
| 2      | 56.958        | MM   | 3.4005      | 6.90640e4    | 338.50012    | 49.9706 |

Totals : 1.38209e5 895.52441

**Table 1 Entry 2**

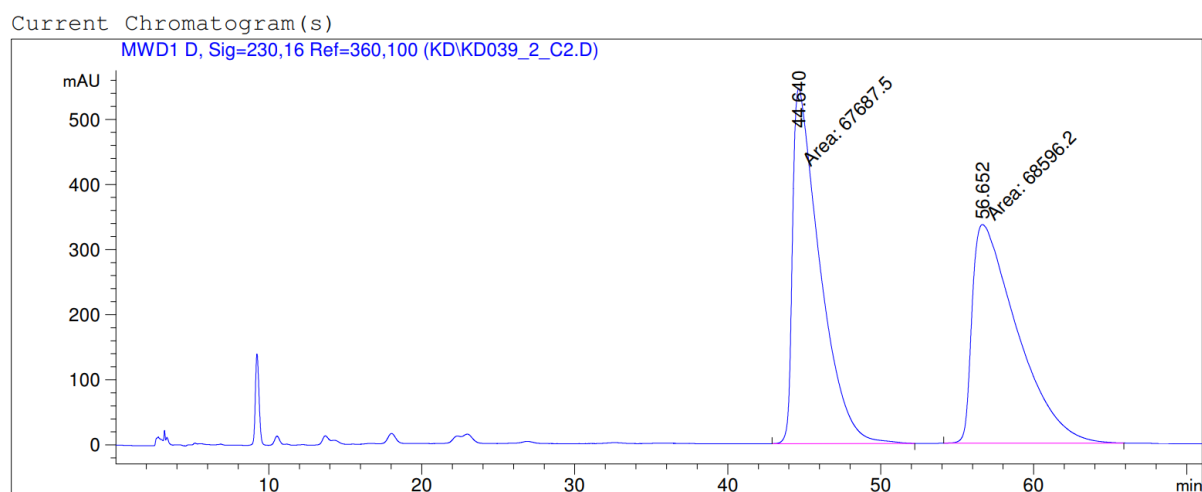

Signal 4: MWD1 D, Sig=230,16 Ref=360,100

| Peak #   | RetTime [min] | Type | Width [min] | Area [mAU*s] | Height [mAU] | Area %  |
|----------|---------------|------|-------------|--------------|--------------|---------|
| 1        | 44.640        | MM   | 2.0675      | 6.76875e4    | 545.64996    | 49.6666 |
| 2        | 56.652        | MM   | 3.4043      | 6.85962e4    | 335.82751    | 50.3334 |
| Totals : |               |      |             | 1.36284e5    | 881.47748    |         |

### Table 1 Entry 3

Current Chromatogram(s)

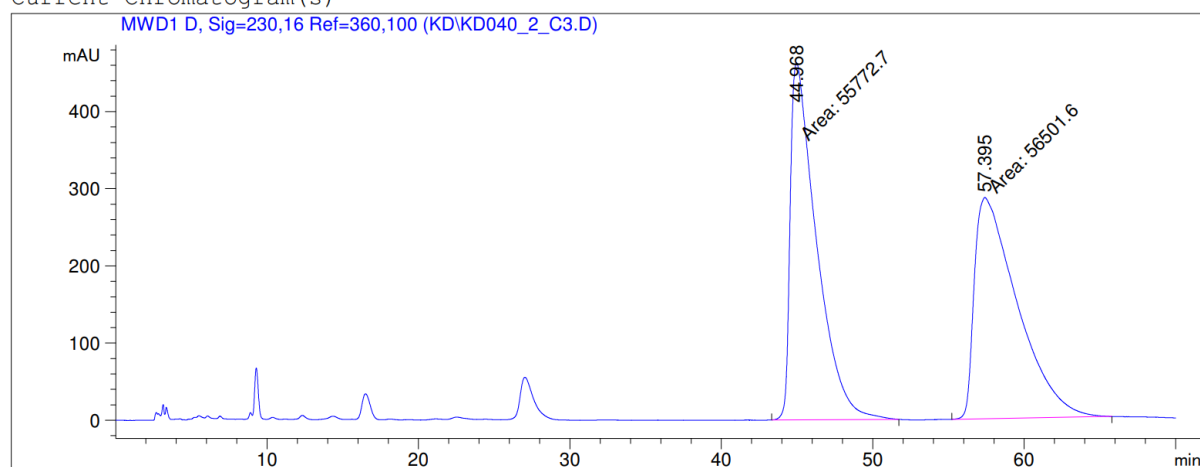

Signal 4: MWD1 D, Sig=230,16 Ref=360,100

| Peak #   | RetTime [min] | Type | Width [min] | Area [mAU*s] | Height [mAU] | Area %  |
|----------|---------------|------|-------------|--------------|--------------|---------|
| 1        | 44.968        | MM   | 2.0089      | 5.57727e4    | 462.70401    | 49.6754 |
| 2        | 57.395        | MM   | 3.2828      | 5.65016e4    | 286.85309    | 50.3246 |
| Totals : |               |      |             | 1.12274e5    | 749.55710    |         |

# Table 1 Entry 4

Current Chromatogram(s)

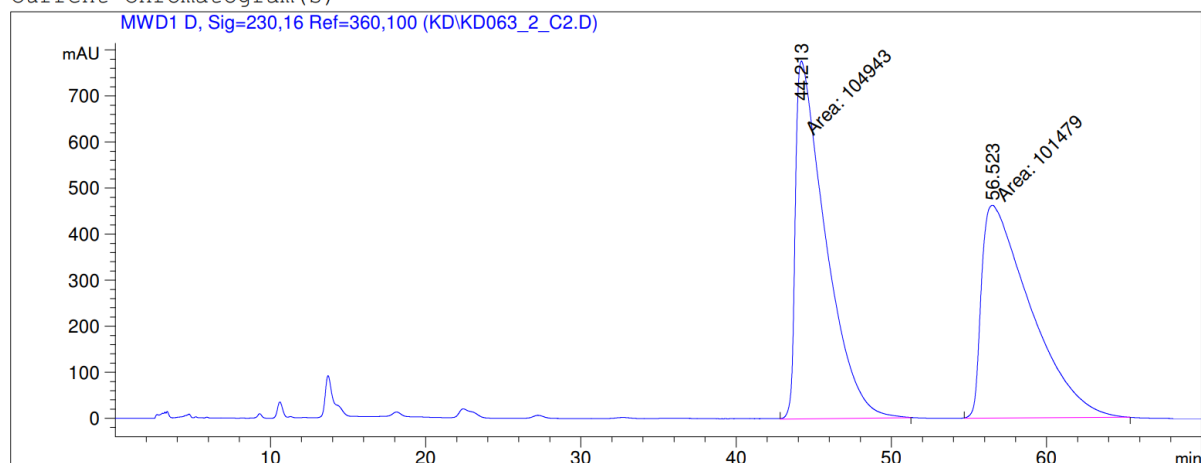

Signal 4: MWD1 D, Sig=230,16 Ref=360,100

| Peak # | RetTime [min] | Type | Width [min] | Area [mAU*s] | Height [mAU] | Area %  |
|--------|---------------|------|-------------|--------------|--------------|---------|
| 1      | 44.213        | MM   | 2.2502      | 1.04943e5    | 777.27722    | 50.8391 |
| 2      | 56.523        | MM   | 3.6595      | 1.01479e5    | 462.17377    | 49.1609 |

Totals : 2.06423e5 1239.45099

# Table 1 Entry 5

Current Chromatogram(s)

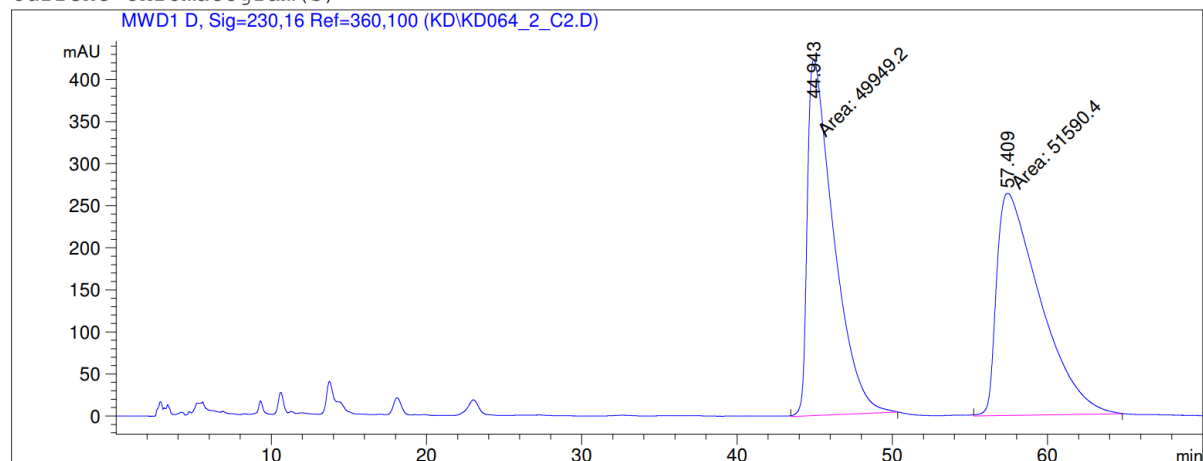

Signal 4: MWD1 D, Sig=230,16 Ref=360,100

| Peak # | RetTime [min] | Type | Width [min] | Area [mAU*s] | Height [mAU] | Area %  |
|--------|---------------|------|-------------|--------------|--------------|---------|
| 1      | 44.943        | MM   | 1.9624      | 4.99492e4    | 424.21576    | 49.1918 |
| 2      | 57.409        | MM   | 3.2557      | 5.15904e4    | 264.10367    | 50.8082 |

Totals : 1.01540e5 688.31943

### Table 1 Entry 6

Current Chromatogram(s)

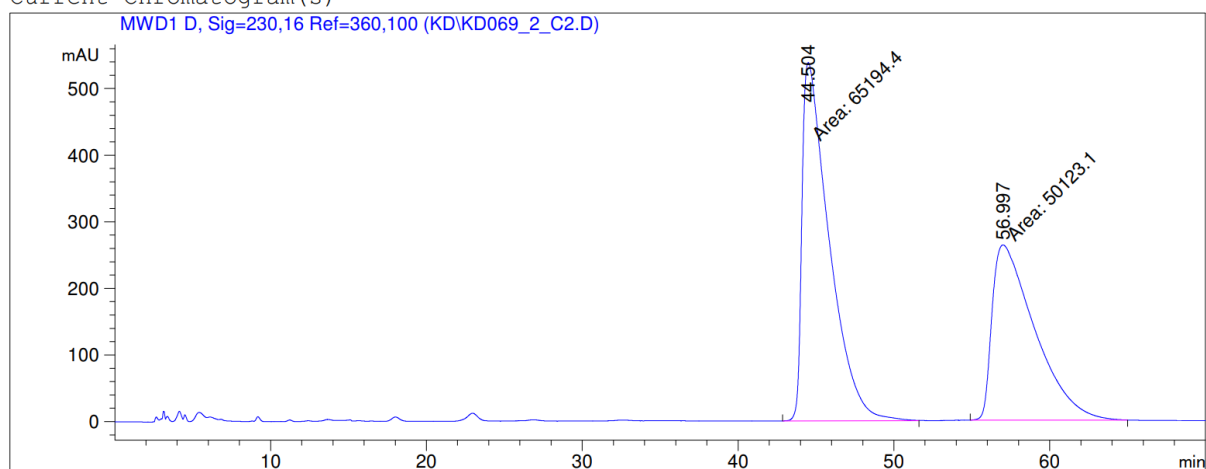

Signal 4: MWD1 D, Sig=230,16 Ref=360,100

| Peak # | RetTime [min] | Type | Width [min] | Area [mAU*s] | Height [mAU] | Area %  |
|--------|---------------|------|-------------|--------------|--------------|---------|
| 1      | 44.504        | MM   | 2.0188      | 6.51944e4    | 538.23322    | 56.5347 |
| 2      | 56.997        | MM   | 3.1748      | 5.01231e4    | 263.13232    | 43.4653 |

Totals : 1.15318e5 801.36554

## Table 1 Entry 7

Current Chromatogram(s)

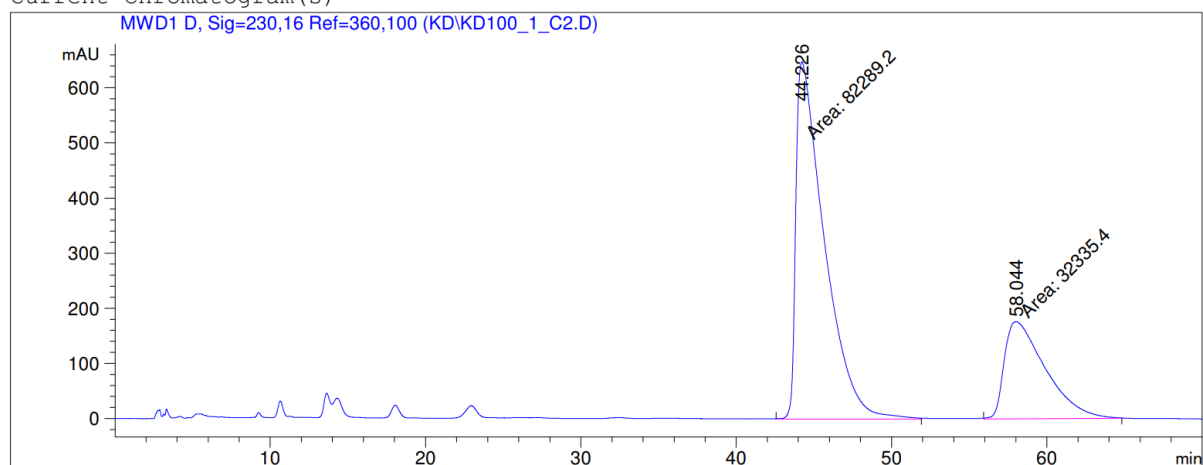

Signal 4: MWD1 D, Sig=230,16 Ref=360,100

| Peak # | RetTime [min] | Type | Width [min] | Area [mAU*s] | Height [mAU] | Area %  |
|--------|---------------|------|-------------|--------------|--------------|---------|
| 1      | 44.226        | MM   | 2.1163      | 8.22892e4    | 648.06805    | 71.7901 |
| 2      | 58.044        | MM   | 3.0584      | 3.23354e4    | 176.20940    | 28.2099 |

Totals : 1.14625e5 824.27745

## Table 1 Entry 8

Current Chromatogram(s)

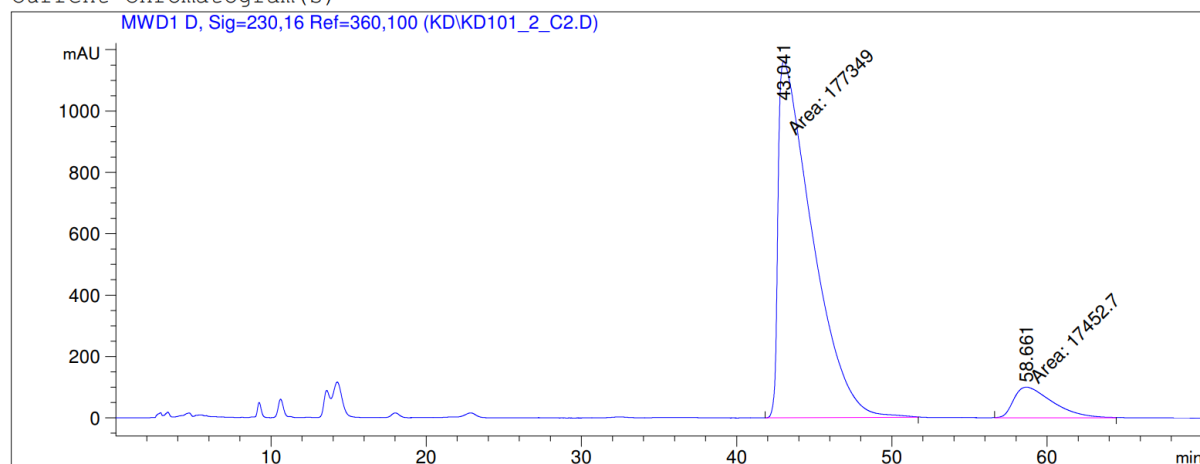

Signal 4: MWD1 D, Sig=230,16 Ref=360,100

| Peak # | RetTime [min] | Type | Width [min] | Area [mAU*s] | Height [mAU] | Area %  |
|--------|---------------|------|-------------|--------------|--------------|---------|
| 1      | 43.041        | MM   | 2.5417      | 1.77349e5    | 1162.92957   | 91.0408 |
| 2      | 58.661        | MM   | 2.9068      | 1.74527e4    | 100.06971    | 8.9592  |

Totals : 1.94802e5 1262.99928

### Table 1 Entry 9

Current Chromatogram(s)

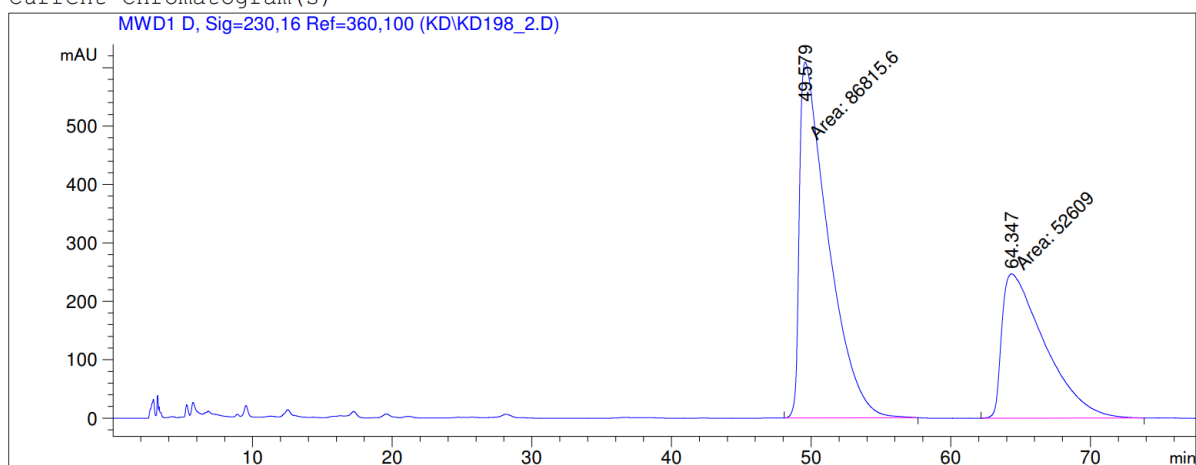

Signal 4: MWD1 D, Sig=230,16 Ref=360,100

| Peak # | RetTime [min] | Type | Width [min] | Area [mAU*s] | Height [mAU] | Area %  |
|--------|---------------|------|-------------|--------------|--------------|---------|
| 1      | 49.579        | MM   | 2.3757      | 8.68156e4    | 609.04187    | 62.2671 |
| 2      | 64.347        | MM   | 3.5499      | 5.26090e4    | 246.99883    | 37.7329 |

Totals : 1.39425e5 856.04070

# Table 1 Entry 10

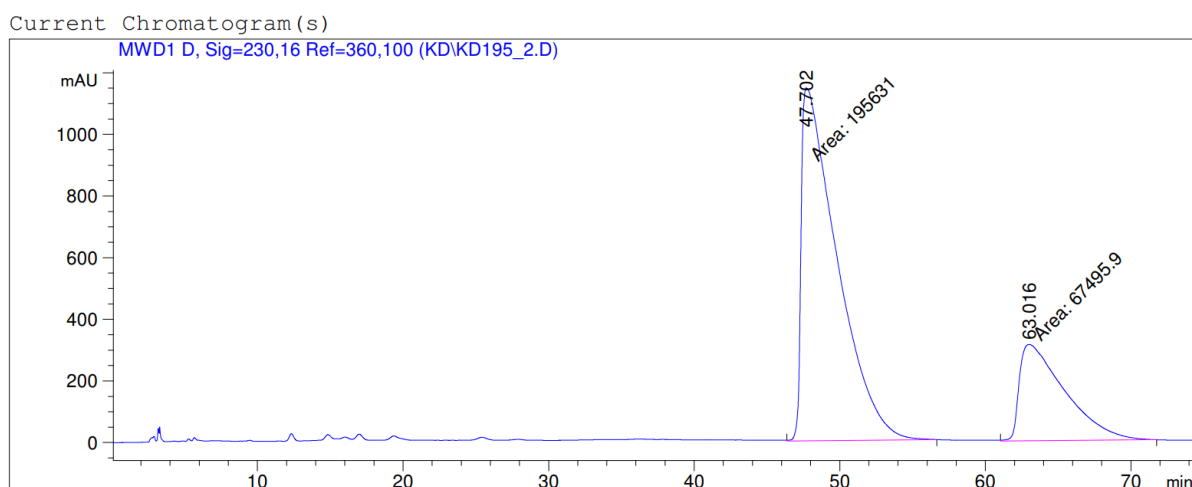

Signal 4: MWD1 D, Sig=230,16 Ref=360,100

| Peak # | RetTime [min] | Type | Width [min] | Area [mAU*s] | Height [mAU] | Area %  |
|--------|---------------|------|-------------|--------------|--------------|---------|
| 1      | 47.702        | MM   | 2.8475      | 1.95631e5    | 1145.06335   | 74.3486 |
| 2      | 63.016        | MM   | 3.6049      | 6.74959e4    | 312.05606    | 25.6514 |

Totals : 2.63127e5 1457.11942

# Table 1 Entry 11

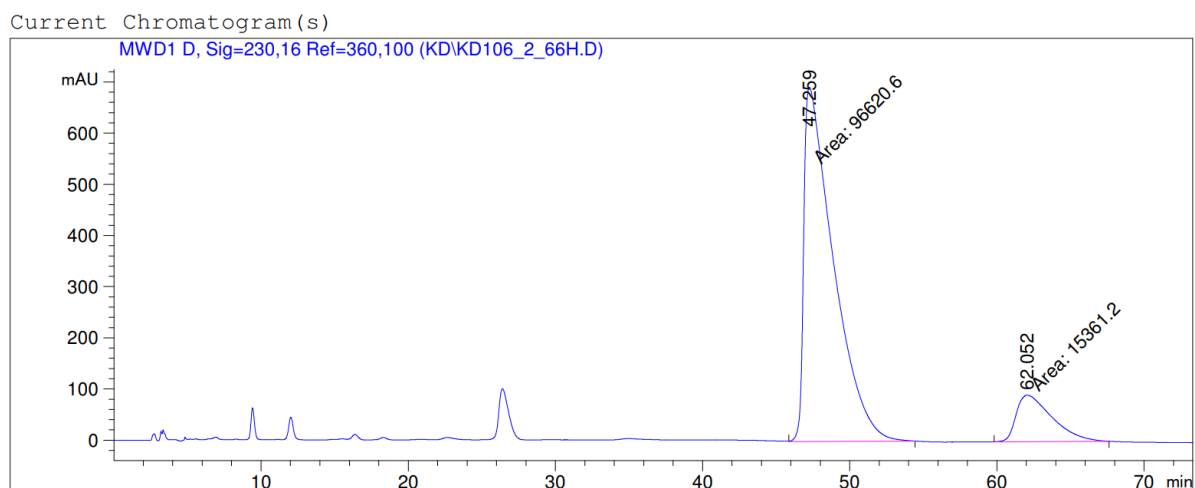

Signal 4: MWD1 D, Sig=230,16 Ref=360,100

| Peak # | RetTime [min] | Type | Width [min] | Area [mAU*s] | Height [mAU] | Area %  |
|--------|---------------|------|-------------|--------------|--------------|---------|
| 1      | 47.259        | MM   | 2.3254      | 9.66206e4    | 692.50116    | 86.2824 |
| 2      | 62.052        | MM   | 2.8058      | 1.53612e4    | 91.24812     | 13.7176 |

Totals : 1.11982e5 783.74928

## Table 1 Entry 12

Current Chromatogram(s)

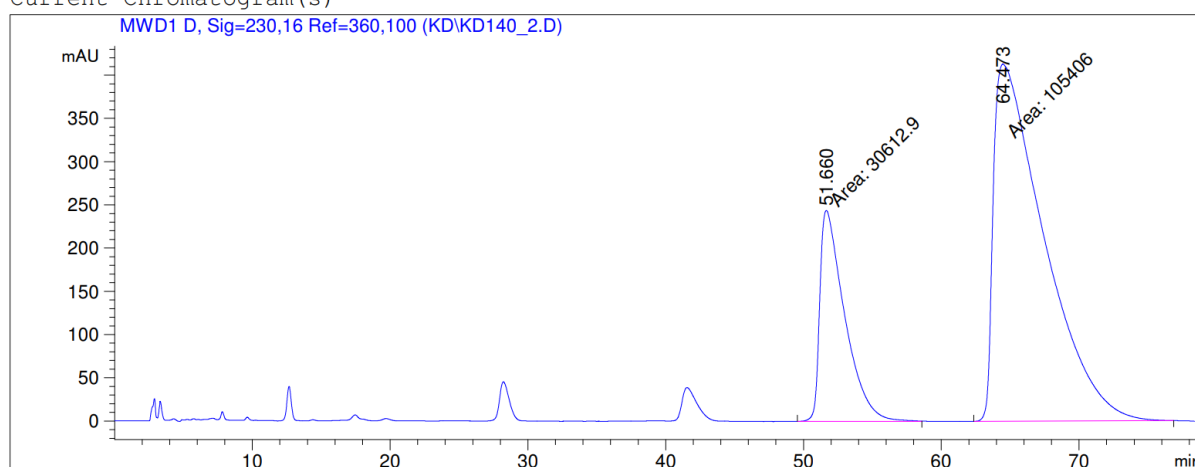

Signal 4: MWD1 D, Sig=230,16 Ref=360,100

| Peak # | RetTime [min] | Type | Width [min] | Area [mAU*s] | Height [mAU] | Area %  |
|--------|---------------|------|-------------|--------------|--------------|---------|
| 1      | 51.660        | MM   | 2.0915      | 3.06129e4    | 243.94930    | 22.5064 |
| 2      | 64.473        | MM   | 4.2491      | 1.05406e5    | 413.44702    | 77.4936 |

Totals : 1.36019e5 657.39632



## Table 1 Entry 16

Current Chromatogram(s)

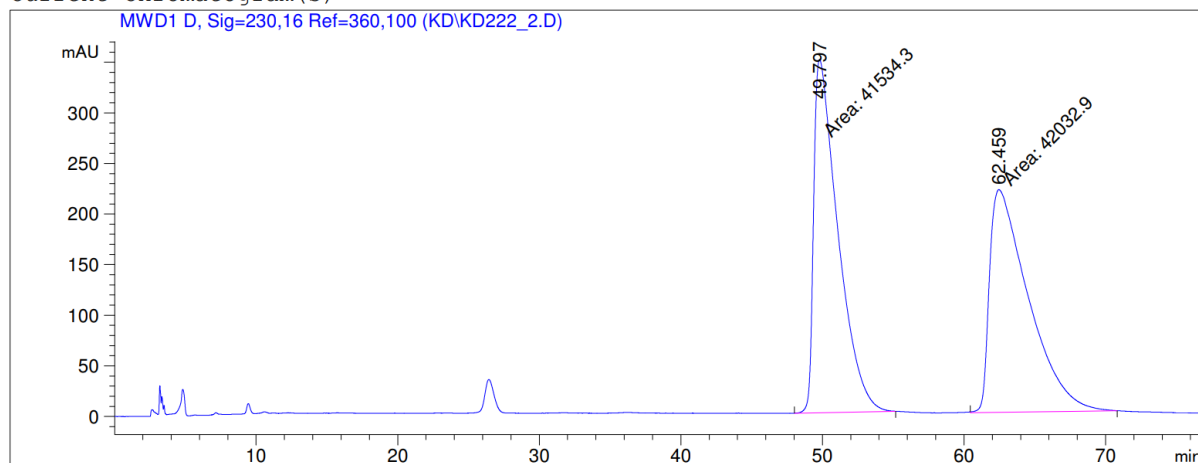

Signal 4: MWD1 D, Sig=230,16 Ref=360,100

| Peak # | RetTime [min] | Type | Width [min] | Area [mAU*s] | Height [mAU] | Area %  |
|--------|---------------|------|-------------|--------------|--------------|---------|
| 1      | 49.797        | MM   | 1.9819      | 4.15343e4    | 349.28497    | 49.7016 |
| 2      | 62.459        | MM   | 3.1835      | 4.20329e4    | 220.05296    | 50.2984 |

Totals : 8.35672e4 569.33794

## Table 1 Entry 17

Only for Entry 17: the determination of ee for **6b** was performed on Agilent 1200 Series chromatograph with Daicel Chiralpack IF column in *n*-hexane/isopropanol 70:30 solvent system, at 25 °C with 1.2 ml/min flow rate. Injected volume: 20 µL in MeOH/DCM.

Current Chromatogram(s)

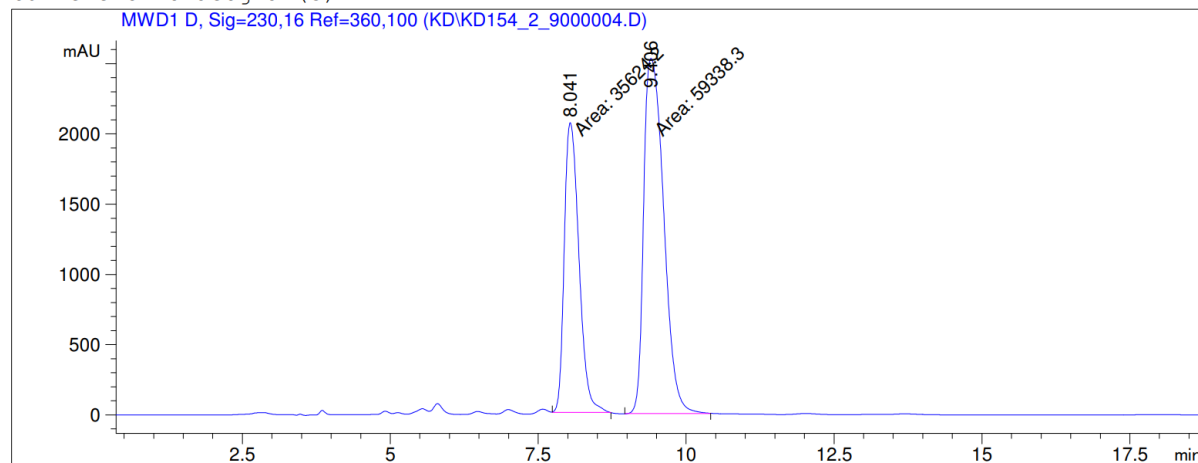

Signal 4: MWD1 D, Sig=230,16 Ref=360,100

| Peak # | RetTime [min] | Type | Width [min] | Area [mAU*s] | Height [mAU] | Area %  |
|--------|---------------|------|-------------|--------------|--------------|---------|
| 1      | 8.041         | MM   | 0.2878      | 3.56242e4    | 2063.13428   | 37.5140 |
| 2      | 9.406         | MM   | 0.3912      | 5.93383e4    | 2527.85889   | 62.4860 |

Totals : 9.49626e4 4590.99316

### Racemic data for Entry 17

Current Chromatogram(s)

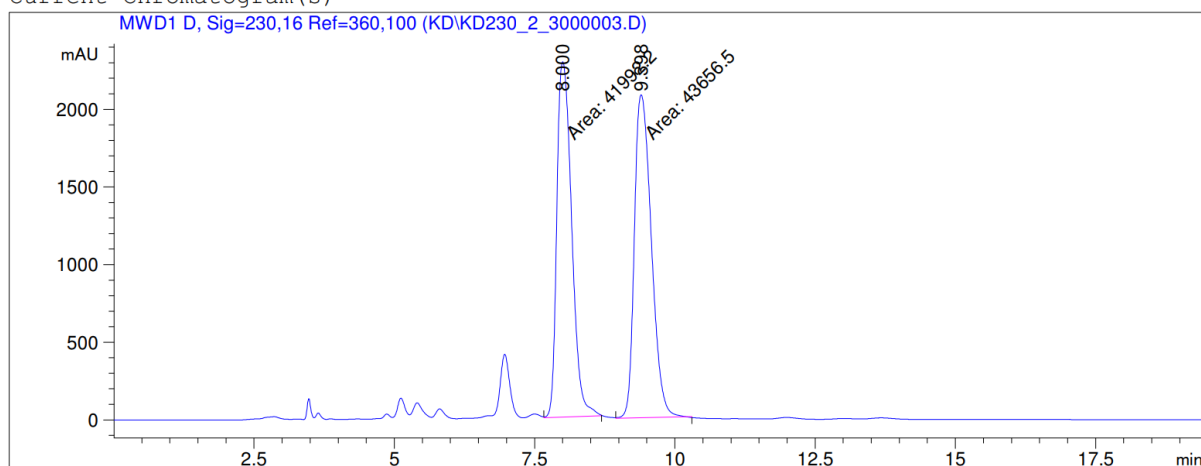

Signal 4: MWD1 D, Sig=230,16 Ref=360,100

| Peak # | RetTime [min] | Type | Width [min] | Area [mAU*s] | Height [mAU] | Area %  |
|--------|---------------|------|-------------|--------------|--------------|---------|
| 1      | 8.000         | MM   | 0.3057      | 4.19922e4    | 2289.10327   | 49.0284 |
| 2      | 9.398         | MM   | 0.3498      | 4.36565e4    | 2080.32104   | 50.9716 |

Totals : 8.56487e4 4369.42432

## Table 1 Entry 19

Current Chromatogram(s)

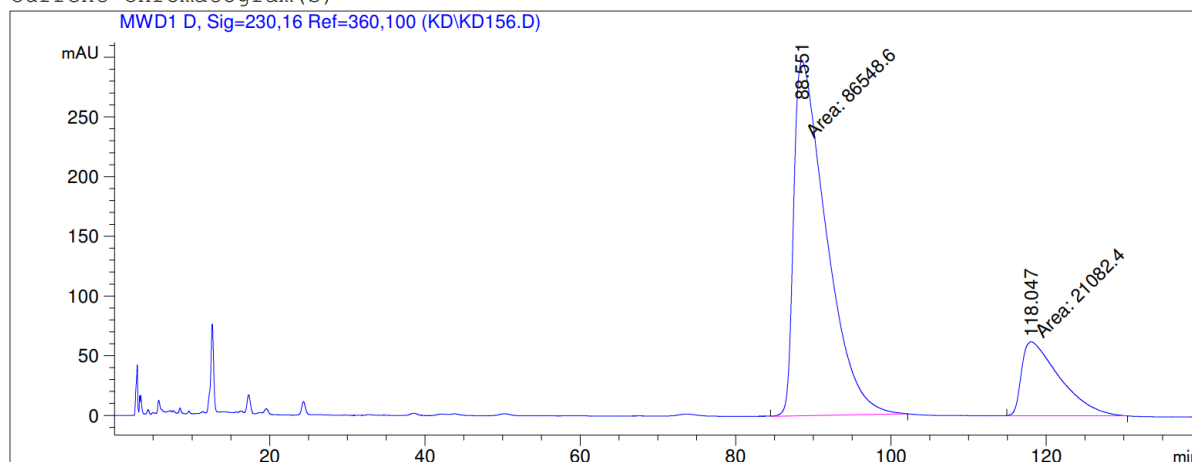

Signal 4: MWD1 D, Sig=230,16 Ref=360,100

| Peak # | RetTime [min] | Type | Width [min] | Area [mAU*s] | Height [mAU] | Area %  |
|--------|---------------|------|-------------|--------------|--------------|---------|
| 1      | 88.551        | MM   | 4.8427      | 8.65486e4    | 297.86652    | 80.4124 |
| 2      | 118.047       | MM   | 5.6625      | 2.10824e4    | 62.05291     | 19.5876 |

Totals : 1.07631e5 359.91943

## Racemic data for Entry 19

Current Chromatogram(s)

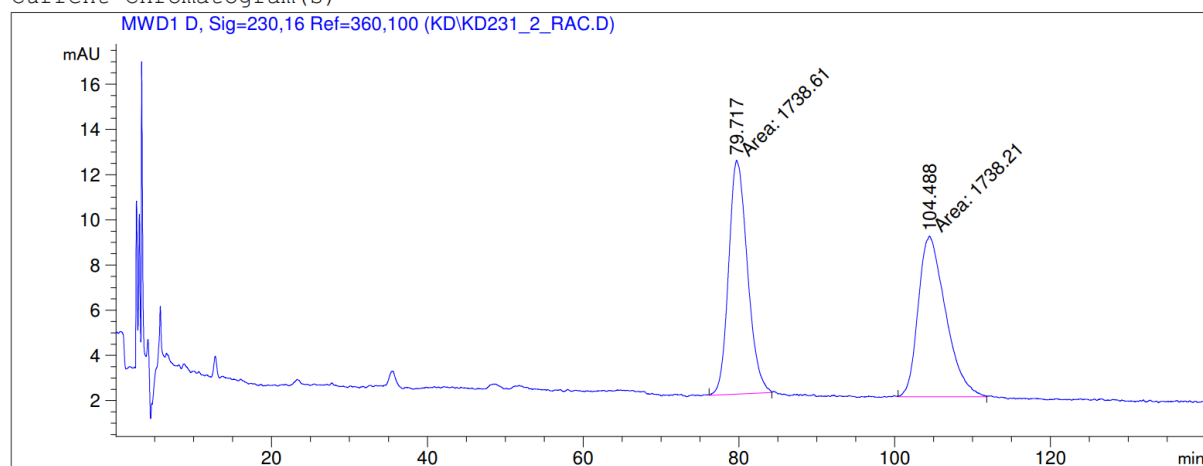

Signal 4: MWD1 D, Sig=230,16 Ref=360,100

| Peak<br># | RetTime<br>[min] | Type | Width<br>[min] | Area<br>[mAU*s] | Height<br>[mAU] | Area<br>% |
|-----------|------------------|------|----------------|-----------------|-----------------|-----------|
| 1         | 79.717           | MM   | 2.8004         | 1738.60901      | 10.34738        | 50.0057   |
| 2         | 104.488          | MM   | 4.0757         | 1738.21021      | 7.10796         | 49.9943   |
| Totals :  |                  |      |                | 3476.81921      | 17.45534        |           |

## 6. Coordination study

To investigate the coordination behavior of PN and PC metal complexes we added 1.0 equiv.  $\text{PPh}_3$  to their solution (with respect to the metal centre of each complex) and stirred for 1 hour. The resulting products were scrutinized by  $^{31}\text{P}\{^1\text{H}\}$  NMR spectroscopy.  $\text{P}_1$  is the phosphorus atom in the PN ligand (**8**),  $\text{P}_2$  is the phosphorus atom in  $\text{PPh}_3$  in the figures.

### $\text{PNPd}^+(\text{PPh}_3)\text{Cl Cl}^-$ (**15**)

To a recrystallized batch of  $\text{PNPdCl}_2$  (**9**) 1.0 equiv.  $\text{PPh}_3$  was added and stirred in methanol. The coupling constants occurred in the following way:

$^{31}\text{P}$  NMR (162 MHz, MeOH)  $\delta$  60.00 (d,  $^2J_{\text{P}_1-\text{P}_2} = 7.25$  Hz), 32.16 (d,  $^2J_{\text{P}_1-\text{P}_2} = 7.25$  Hz).

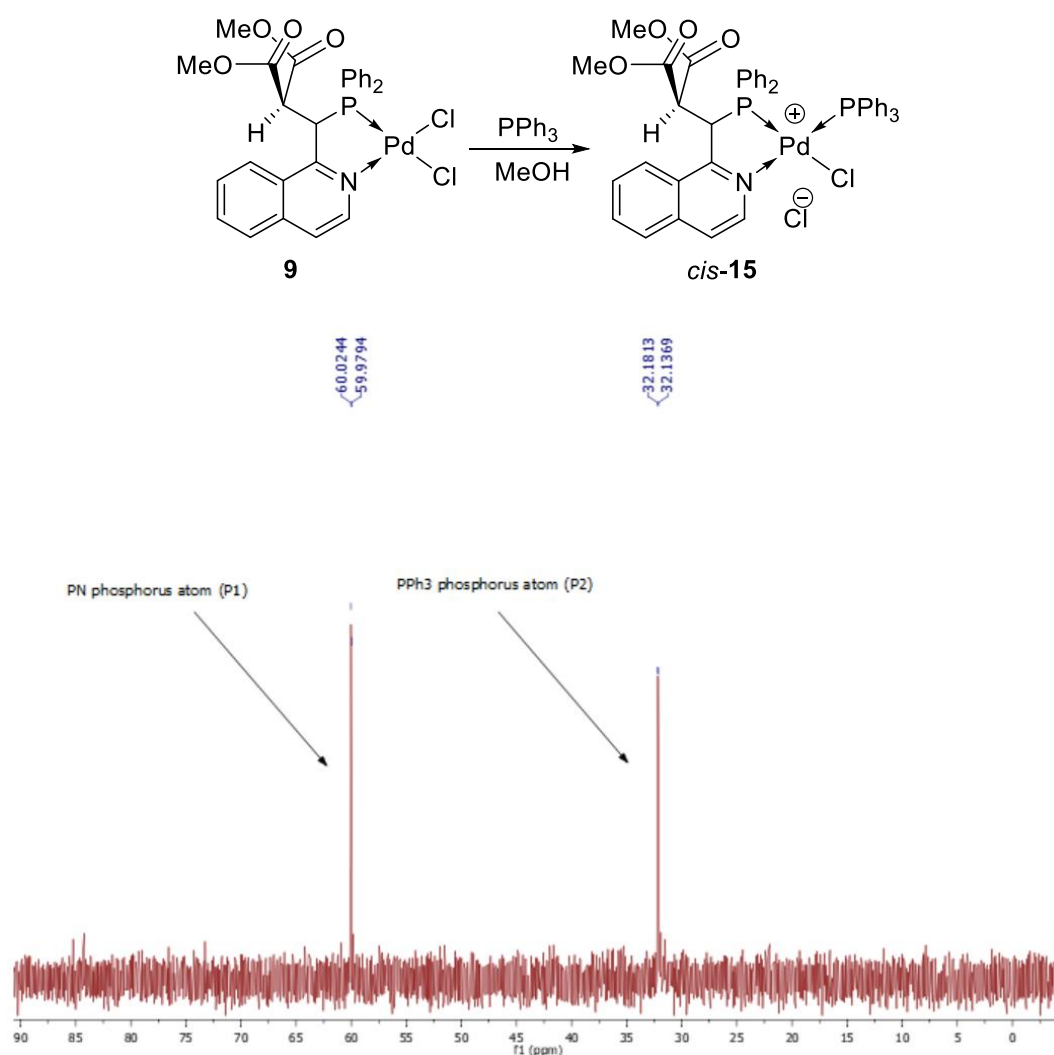

Figure S38.  $^{31}\text{P}\{^1\text{H}\}$  spectrum of the coordination product of complex **9** and triphenylphosphine.

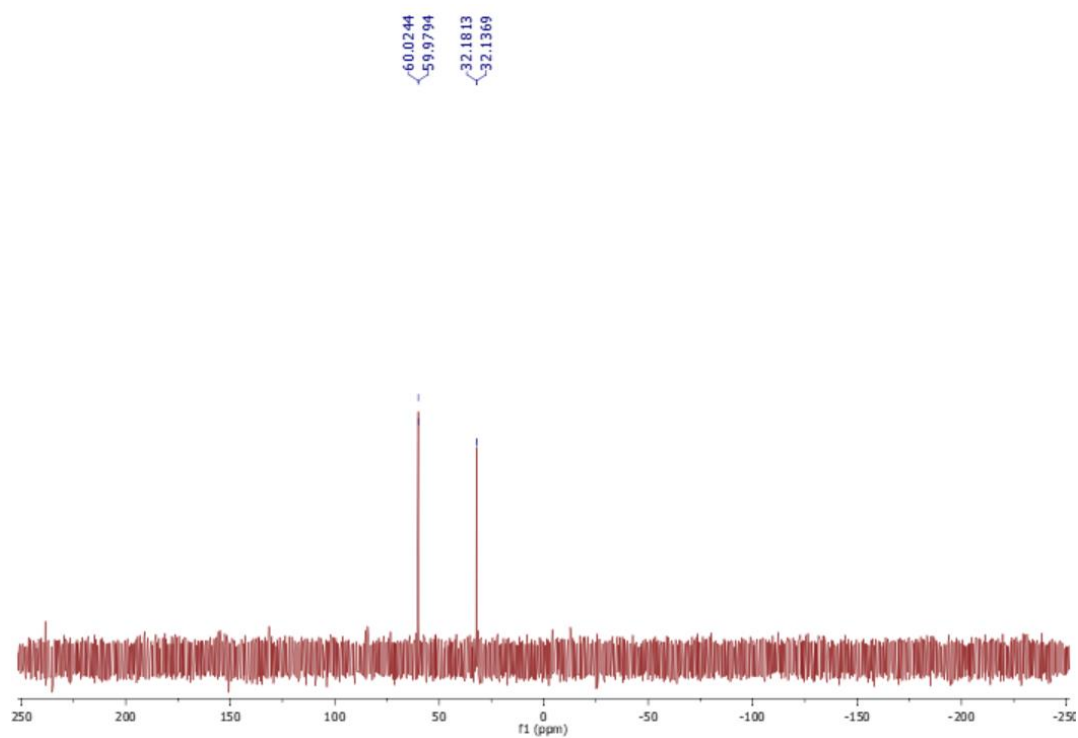

Figure S39. The full  $^{31}\text{P}\{^1\text{H}\}$  spectrum of the coordination product of complex **9** and triphenylphosphine.

### PCPd(PPh<sub>3</sub>)Cl (**19**)

To a recrystallized batch of [PCPdCl]<sub>2</sub> dimer (**18**) 0.5 equiv. PPh<sub>3</sub> was added and stirred in dichloromethane. The coupling constants occurred in the following way:

$^{31}\text{P}$  NMR (162 MHz, DCM)  $\delta$  63.65 (d,  $^2J_{\text{P1-P2}} = 26.45$  Hz), 54.69 (d,  $^2J_{\text{P1-P2}} = 427.2$  Hz), 26.36 (d,  $^2J_{\text{P1-P2}} = 427.2$  Hz), 17.72 (d,  $^2J_{\text{P1-P2}} = 26.45$  Hz).

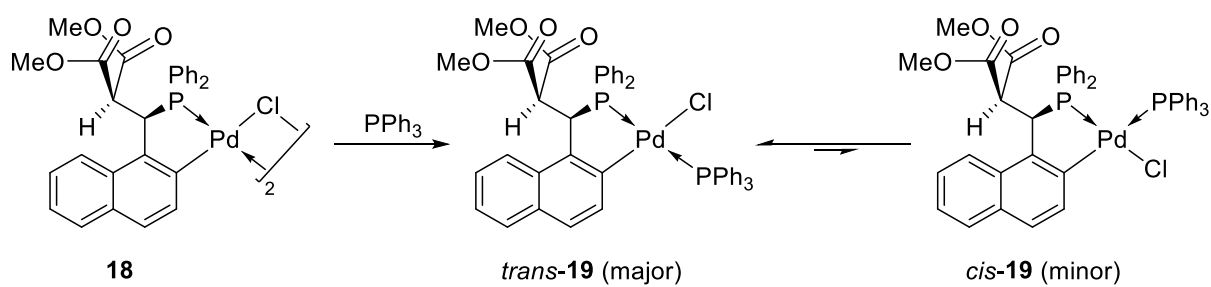

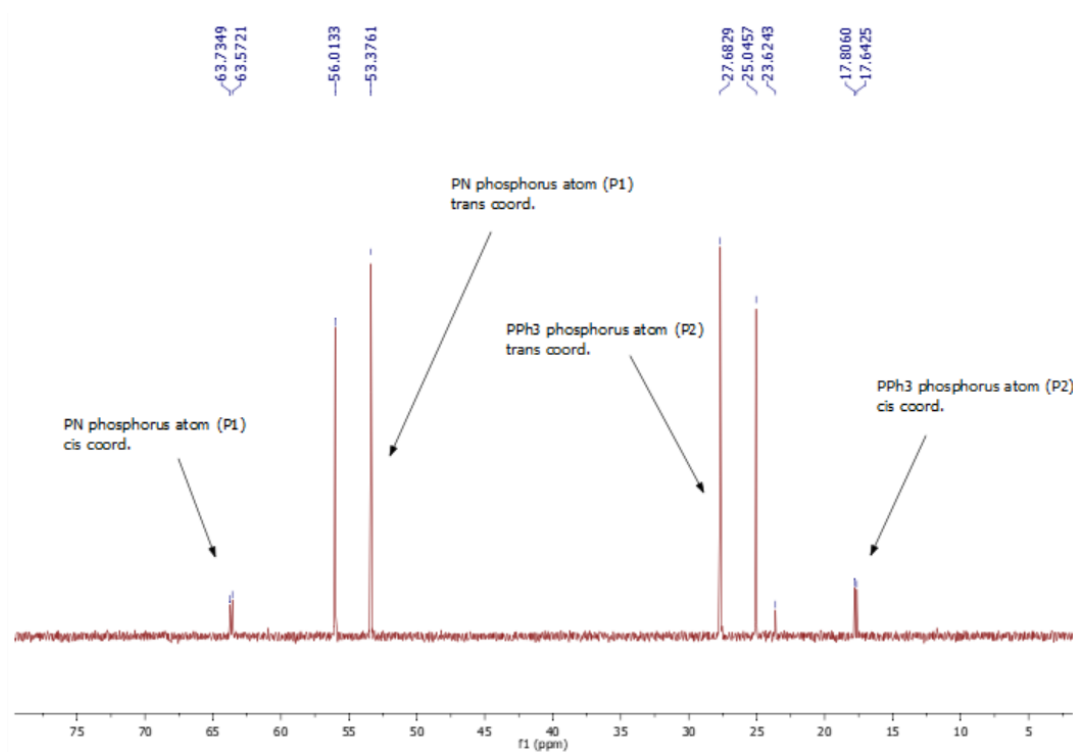

Figure S40.  $^{31}\text{P}\{^1\text{H}\}$  spectrum of the coordination products of complex **18** and triphenylphosphine.

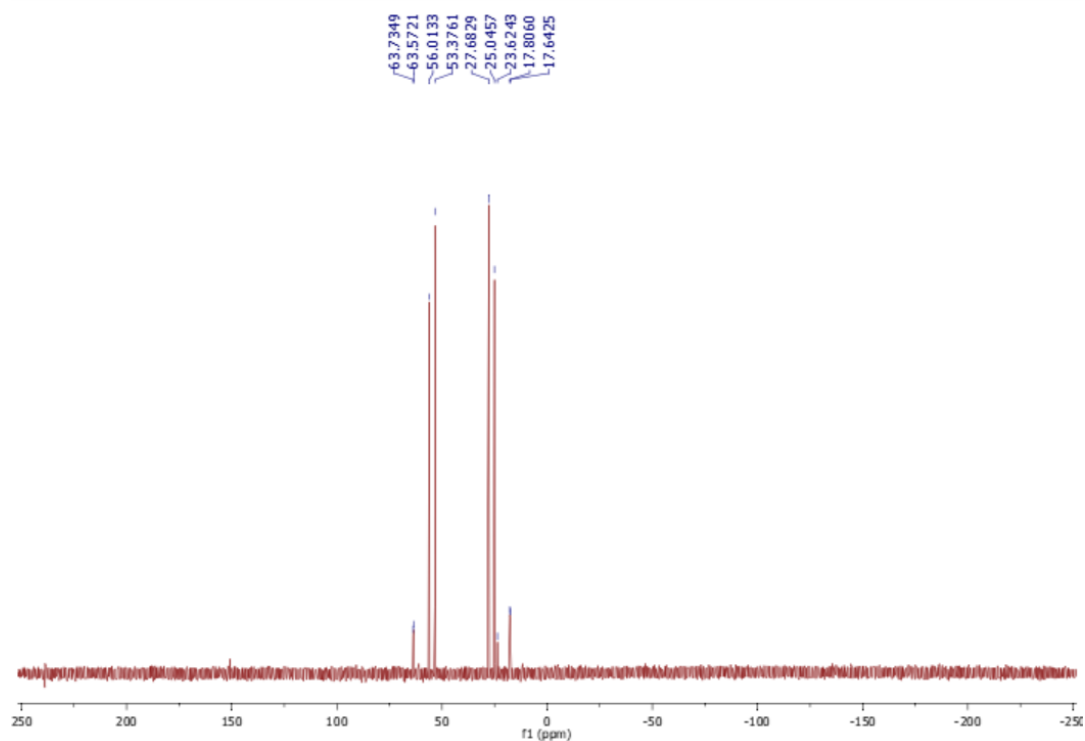

Figure S41. The full  $^{31}\text{P}\{^1\text{H}\}$  spectrum of the coordination products of complex **18** and triphenylphosphine.

### PNPt<sup>+</sup>(PPh<sub>3</sub>)Cl Cl<sup>-</sup> (**16**)

To a recrystallized batch of PNPtCl<sub>2</sub> (**10**) 1.0 equiv. PPh<sub>3</sub> was added and stirred in dichloromethane. The coupling constants occurred in the following way:

<sup>31</sup>P NMR (162 MHz, DCM) δ 39.76 (d, <sup>2</sup>J<sub>P1-P2</sub> = 13.25 Hz), 39.74 (d, <sup>1</sup>J<sub>Pt-P1</sub> = 3693.6 Hz, 13.2 Hz); 28.72 (s), 28.72 (d, <sup>1</sup>J<sub>Pt-P</sub> = 3798.0 Hz); 14.00 (s), 14.00 (d, <sup>1</sup>J<sub>Pt-P</sub> = 3680.0 Hz); 6.35 (d, <sup>1</sup>J<sub>Pt-P2</sub> = 3445.6 Hz), 6.31 (d, <sup>2</sup>J<sub>P1-P2</sub> = 13.25 Hz).

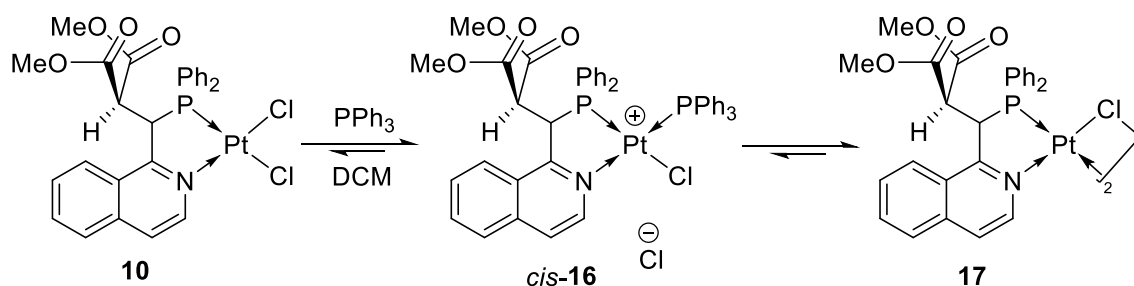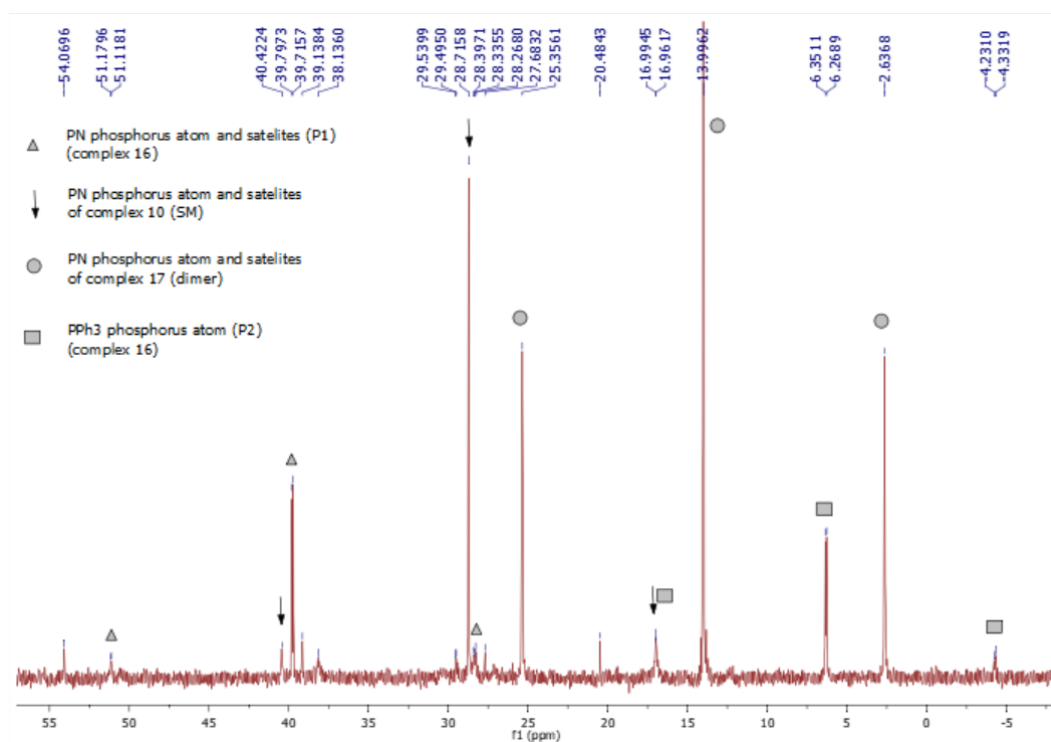

Figure S42. <sup>31</sup>P{<sup>1</sup>H} spectrum of the coordination products of complex **10** and triphenylphosphine.



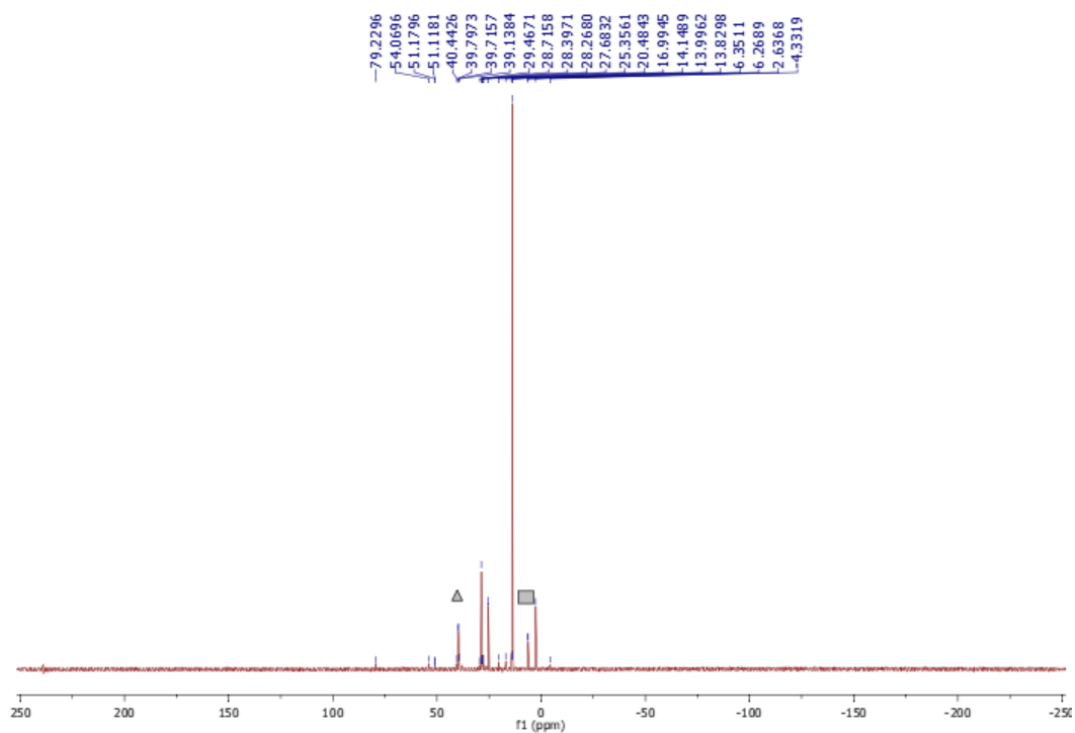

Figure S43. The full  $^{31}\text{P}\{^1\text{H}\}$  spectrum of the coordination products of complex **10** and triphenylphosphine.

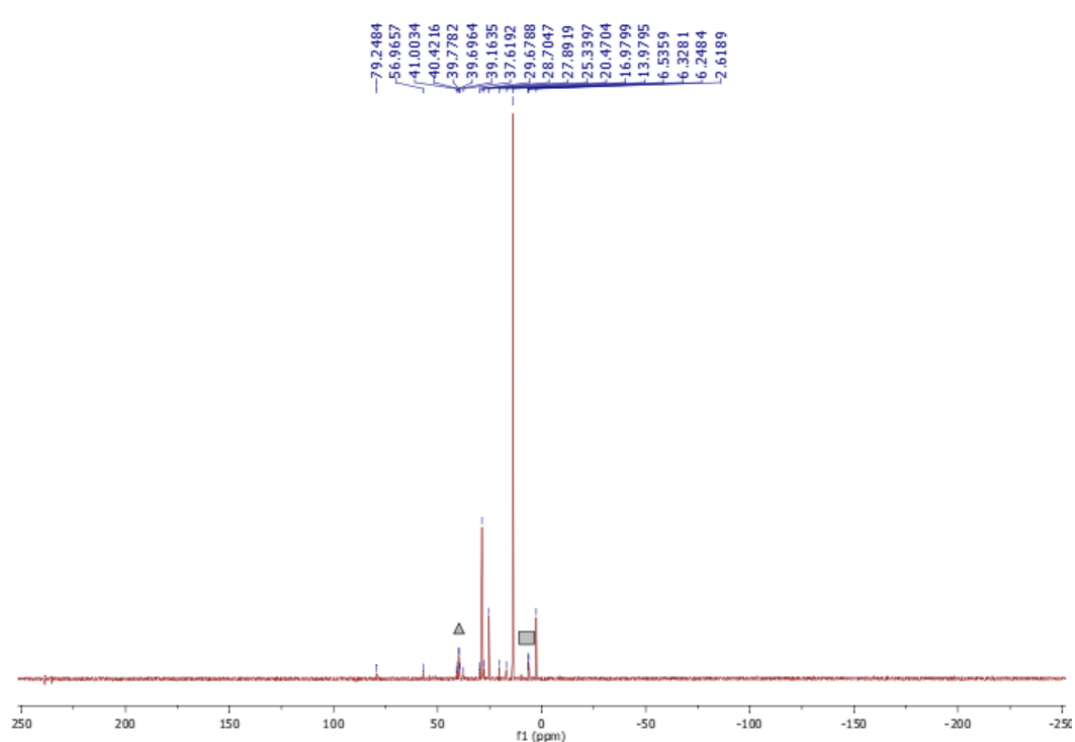

Figure S44. The full  $^{31}\text{P}\{^1\text{H}\}$  spectrum of the coordination products of complex **10** and triphenylphosphine after 2 weeks.

## PNRh(PPh<sub>3</sub>)Cl (**20**)

To a newly synthesized batch of (**8**) PN ligand 0.5 equiv. [Rh(ethylene)Cl]<sub>2</sub> and 1.0 equiv. PPh<sub>3</sub> were added. The coupling constants occurred in the following way:

<sup>31</sup>P NMR (162 MHz, DCM) δ 75.16 (dd, <sup>1</sup>J<sub>Rh-P1</sub> = 200.3 Hz, <sup>2</sup>J<sub>P1-P2</sub> = 41.55 Hz), 46.20 (dd, <sup>1</sup>J<sub>Rh-P2</sub> = 171.9 Hz, <sup>2</sup>J<sub>P1-P2</sub> = 41.55 Hz).

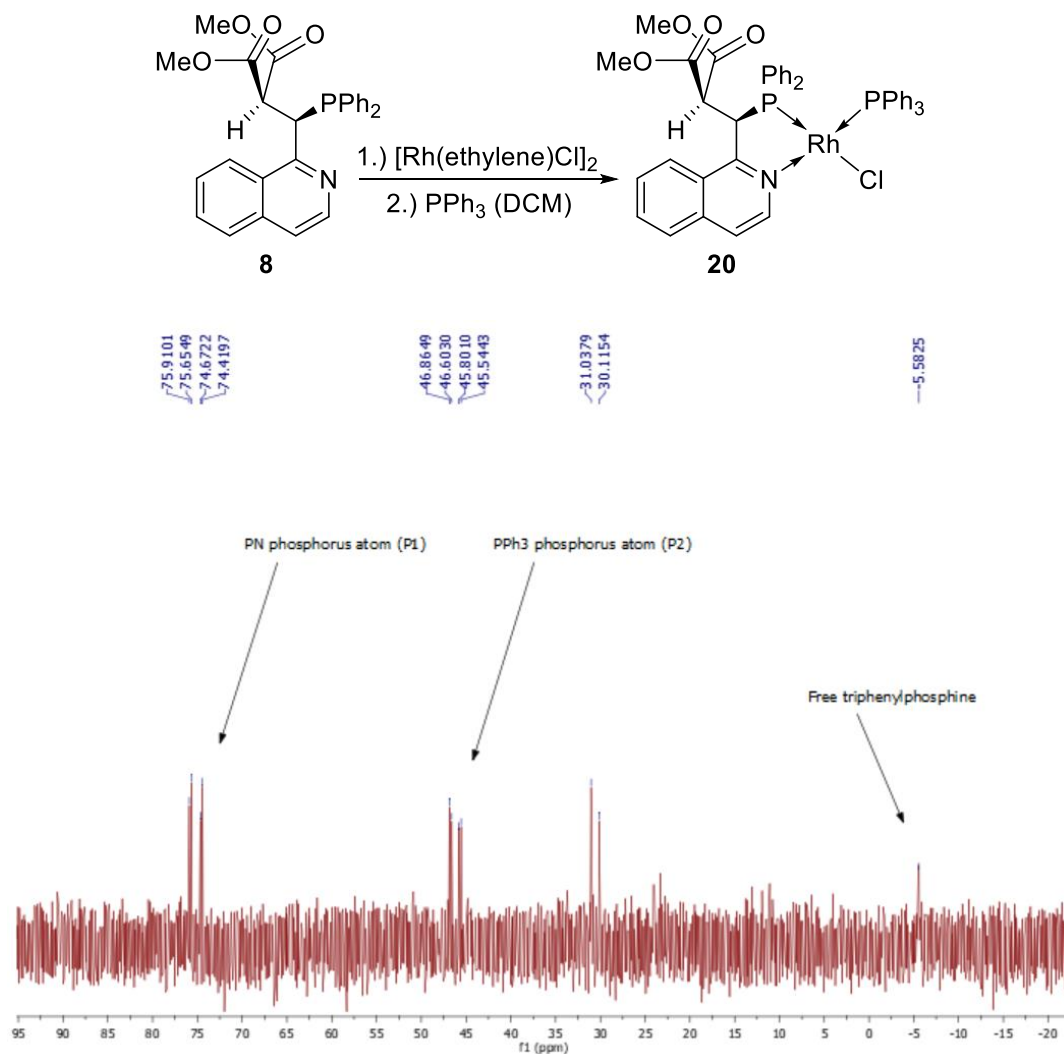

Figure S45. <sup>31</sup>P{<sup>1</sup>H} spectrum of coordination product **20**.

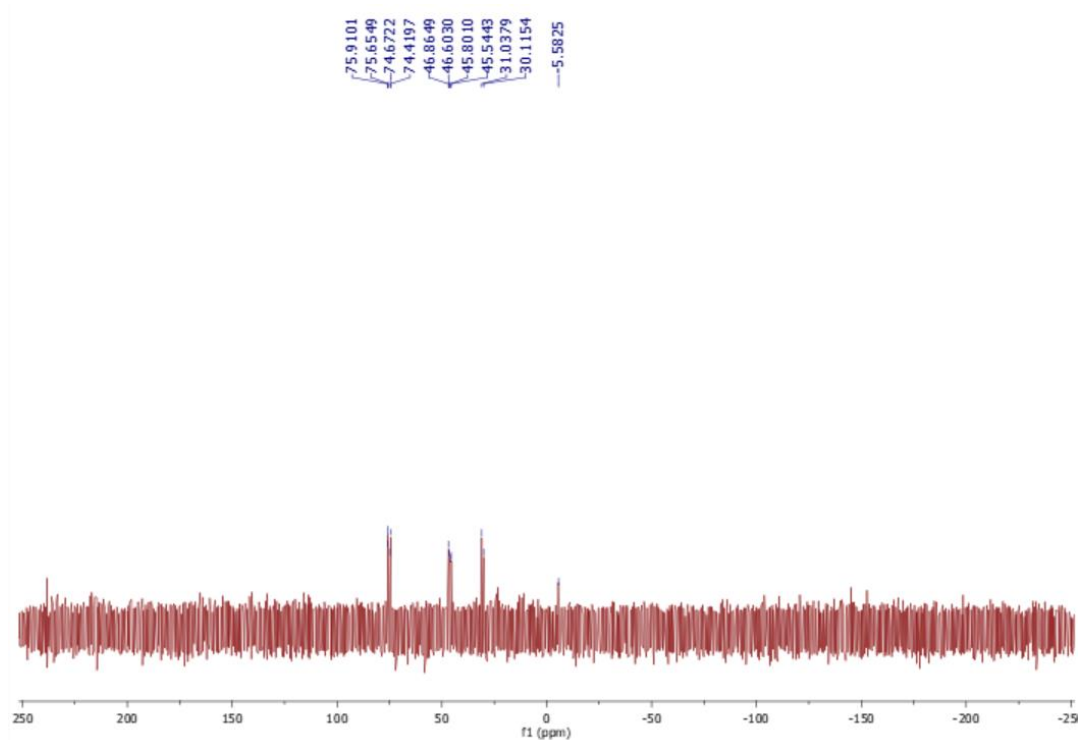

Figure S46. The full  $^{31}\text{P}\{^1\text{H}\}$  spectrum of coordination product **20**.

### **PNIr(PPh<sub>3</sub>)Cl (**21**)**

To a newly synthesized batch of (**8**) PN ligand 0.5 equiv.  $[\text{Ir}(\text{COD})\text{Cl}]_2$  and 1.0 equiv.  $\text{PPh}_3$  were added. The coupling constants occurred in the following way:

$^{31}\text{P}$  NMR (162 MHz, DCM)  $\delta$  32.14 (d,  $^2J_{\text{P1-P2}} = 32.8$  Hz), -30.31 (d,  $^2J_{\text{P1-P2}} = 32.8$  Hz).

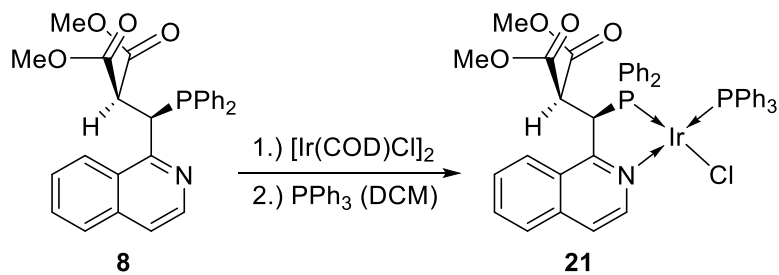

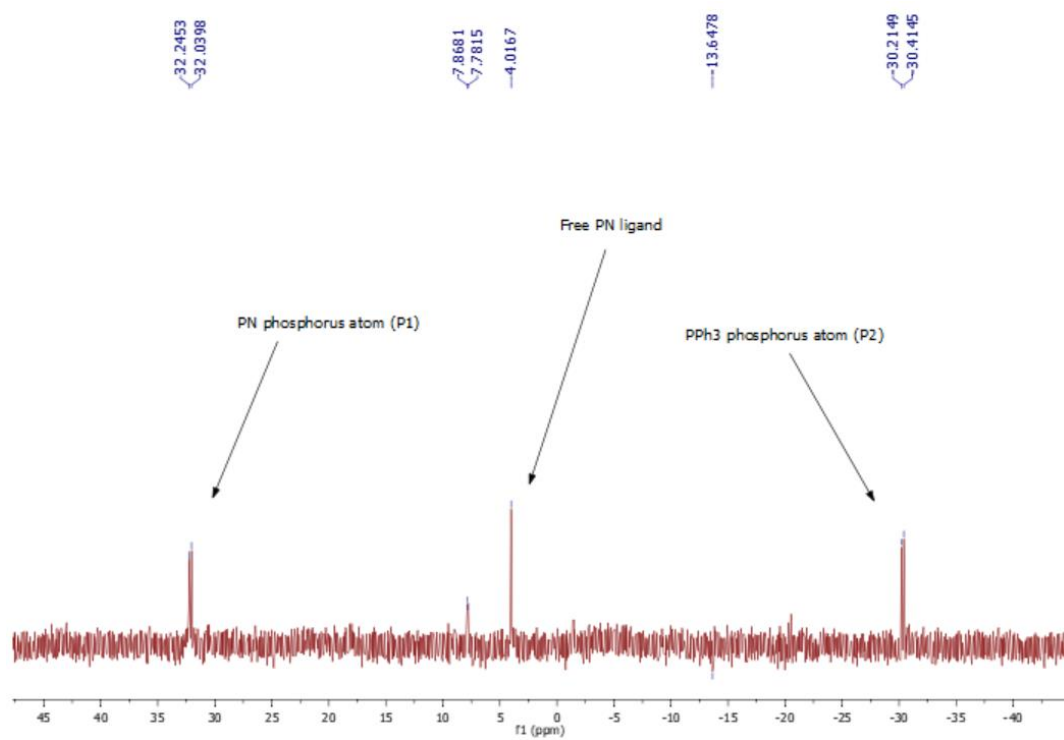

Figure S47.  $^{31}\text{P}\{^1\text{H}\}$  spectrum of coordination product **21**.

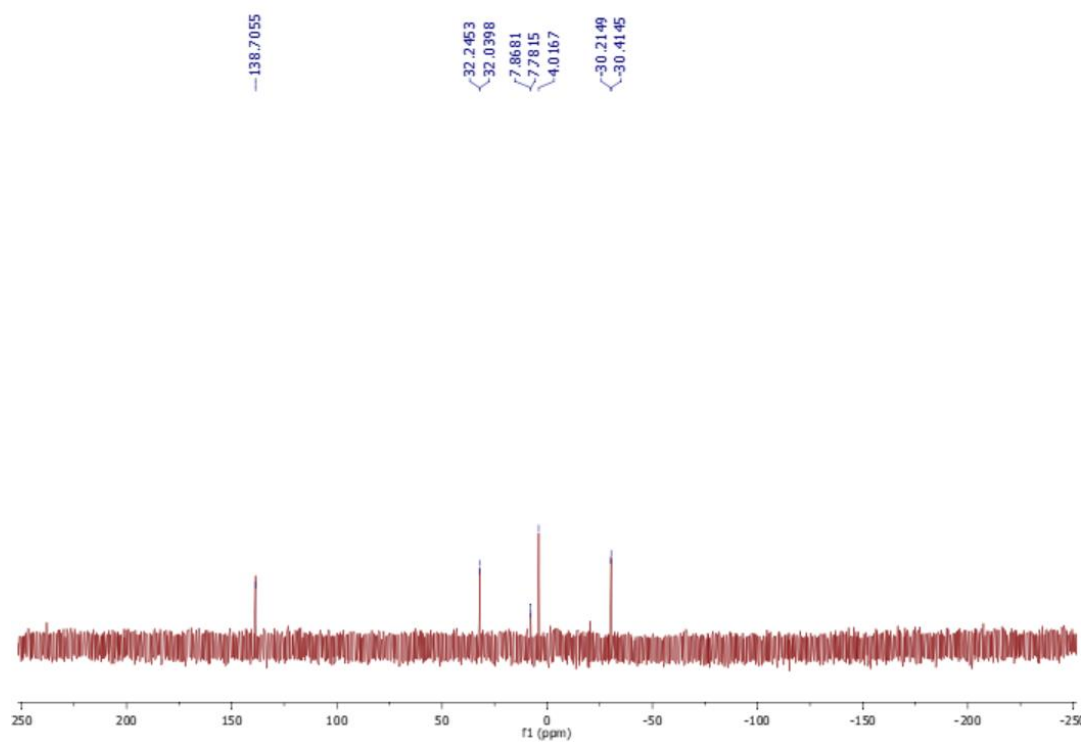

Figure S48. The full  $^{31}\text{P}\{^1\text{H}\}$  spectrum of coordination product **21**.

## 7. NBO analysis and the XYZ coordinates for the optimized geometries

### List of authors of Gaussian 09

Gaussian 09, Revision A.02, M. J. Frisch, G. W. Trucks, H. B. Schlegel, G. E. Scuseria, M. A. Robb, J. R. Cheeseman, G. Scalmani, V. Barone, G. A. Petersson, H. Nakatsuji, X. Li, M. Caricato, A. Marenich, J. Bloino, B. G. Janesko, R. Gomperts, B. Mennucci, H. P. Hratchian, J. V. Ortiz, A. F. Izmaylov, J. L. Sonnenberg, D. Williams-Young, F. Ding, F. Lipparini, F. Egidi, J. Goings, B. Peng, A. Petrone, T. Henderson, D. Ranasinghe, V. G. Zakrzewski, J. Gao, N. Rega, G. Zheng, W. Liang, M. Hada, M. Ehara, K. Toyota, R. Fukuda, J. Hasegawa, M. Ishida, T. Nakajima, Y. Honda, O. Kitao, H. Nakai, T. Vreven, K. Throssell, J. A. Montgomery, Jr., J. E. Peralta, F. Ogliaro, M. Bearpark, J. J. Heyd, E. Brothers, K. N. Kudin, V. N. Staroverov, T. Keith, R. Kobayashi, J. Normand, K. Raghavachari, A. Rendell, J. C. Burant, S. S. Iyengar, J. Tomasi, M. Cossi, J. M. Millam, M. Klene, C. Adamo, R. Cammi, J. W. Ochterski, R. L. Martin, K. Morokuma, O. Farkas, J. B. Foresman, and D. J. Fox, Gaussian, Inc., Wallingford CT, 2016.

### Computational Methods

Geometries were optimized with Gaussian 09.E01 by the DFT method B3LYP with general basis set. SDD effective core potential basis set was used for Pd and Pt atoms, and 6-31G\* basis set was used for the remaining atoms. NBO analyses were performed to evaluate  $\pi$ -electron delocalization energies. In our NBO analysis,  $d(\text{Pt})$  to  $\pi^*(\text{C}=\text{N})$  interaction was split into two pairs, thus, we defined the sum of energies for these pairs as  $\pi$ -electron delocalization energy.

### Results and Discussion

Complex **9** contains palladium metal center and ligand with coordinating N atom, and complex **18** contains the same metal center and ligand with coordinating C atom. The  $\pi$ -electron delocalization energy of complex **9** is 1.94 kcal/mol and that of complex **18** is 4.72 kcal/mol, which means there is a stronger  $d(\text{Pd})$  to  $\pi^*(\text{aromatic})$  interaction in complex **18**.

The only difference between complex **9** and **10** is the metal center. In complex **9**, the metal is Pd as there is Pt in complex **10**. The  $\pi$ -electron delocalization energy of complex **9** is 1.94 kcal/mol and that of complex **10** is 4.45 kcal/mol, which means there is a stronger  $d(\text{metal})$  to  $\pi^*(\text{C}=\text{N})$  interaction in complex **10**. The difference may arise from the fact that 5d atomic orbitals in Pt (compared to 4d orbitals in Pd) are more diffuse and easier to donate to the ligand's  $\pi^*$  orbital when the symmetry of orbitals matches up.

Table S1. Second-order interaction energy ( $E^2$ , kcal/mol) between donor and acceptor orbitals in complex **9**.

| NBO Donor                                                                                   | NBO Acceptor                                                                                 | Type of NBO                            | $E^2$ / kcal/mol |
|---------------------------------------------------------------------------------------------|----------------------------------------------------------------------------------------------|----------------------------------------|------------------|
| 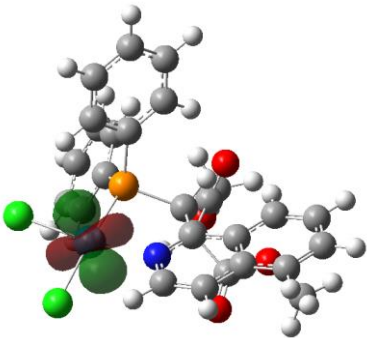<br>NBO132 | <br>NBO147 | NBO132: LP of Pd<br>NBO147: BD* of C-N | 1.94             |

Table S2. Second-order interaction energy ( $E^2$ , kcal/mol) between donor and acceptor orbitals in complex **10**.

| NBO Donor                                                                                     | NBO Acceptor                                                                                   | Type of NBO                            | $E^2$ / kcal/mol |
|-----------------------------------------------------------------------------------------------|------------------------------------------------------------------------------------------------|----------------------------------------|------------------|
| 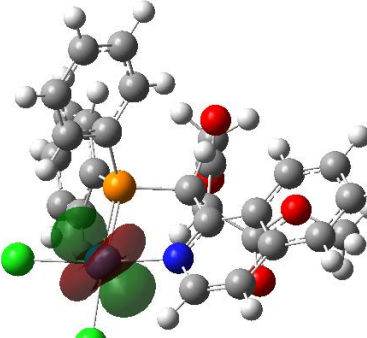<br>NBO134 | <br>NBO147 | NBO134: LP of Pt<br>NBO147: BD* of C-N | 3.10             |
| <br>NBO138 | <br>NBO147 | NBO134: LP of Pt<br>NBO147: BD* of C-N | 1.35             |

Table S3. Second-order interaction energy ( $E^2$ , kcal/mol) between donor and acceptor orbitals in complex **18**.

| NBO Donor                                                                                   | NBO Acceptor                                                                                 | Type of NBO                                  | $E^2$ / kcal/mol |
|---------------------------------------------------------------------------------------------|----------------------------------------------------------------------------------------------|----------------------------------------------|------------------|
| 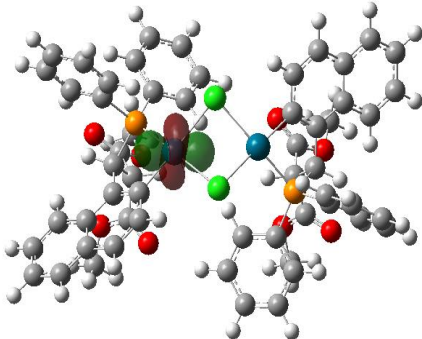<br>NBO242 | <br>NBO298 | NBO242:<br>LP of Pd<br>NBO298:<br>BD* of C-C | 4.72             |

### XYZ coordinates of the optimized geometries (Å)

#### Complex **9**

```

C   1.845310 -2.821550 -0.751908
H   1.370247 -3.621901 -1.307161
C   3.140243 -2.881026 -0.313429
H   3.735879 -3.765362 -0.518359
C   3.692987 -1.801303  0.413588
C   5.018907 -1.823925  0.919946
H   5.629907 -2.704780  0.742650
C   5.516392 -0.750943  1.622327
H   6.530821 -0.775129  2.010229
C   4.707845  0.390392  1.844105
H   5.108513  1.231969  2.401727
C   3.417975  0.444226  1.363983
H   2.830521  1.338549  1.535340
C   2.868821 -0.652298  0.636676
C   1.531652 -0.667873  0.122824
C   0.630098  0.539159  0.298198
H   0.862170  1.021990  1.246731
C   0.792302  1.646058 -0.795362
H   0.096510  1.470192 -1.620017
C   0.482079  3.012144 -0.177287
C  -0.118483  5.234375 -0.665161
H  -0.982107  5.226329  0.003578
H  -0.333168  5.810759 -1.564655
H   0.748101  5.642844 -0.139531
C   2.171523  1.652120 -1.470961
C   4.273717  2.712849 -1.593848
H   4.842994  1.809325 -1.363157

```

|    |           |           |           |
|----|-----------|-----------|-----------|
| H  | 4.742269  | 3.589111  | -1.146161 |
| H  | 4.193737  | 2.824934  | -2.677411 |
| C  | -2.254163 | 1.300175  | -0.137971 |
| C  | -2.733164 | 2.263511  | 0.764229  |
| H  | -2.471759 | 2.208789  | 1.815338  |
| C  | -3.561508 | 3.292934  | 0.315552  |
| H  | -3.935926 | 4.027318  | 1.023636  |
| C  | -3.918881 | 3.370088  | -1.032870 |
| H  | -4.570421 | 4.168703  | -1.377415 |
| C  | -3.455427 | 2.408806  | -1.932726 |
| H  | -3.748679 | 2.449618  | -2.977683 |
| C  | -2.635596 | 1.371422  | -1.488699 |
| H  | -2.320882 | 0.596029  | -2.180172 |
| C  | -1.473716 | -0.378092 | 2.159300  |
| C  | -2.253581 | -1.493628 | 2.507152  |
| H  | -2.647848 | -2.138250 | 1.726730  |
| C  | -2.527637 | -1.761966 | 3.849144  |
| H  | -3.130575 | -2.627231 | 4.109336  |
| C  | -2.026857 | -0.927304 | 4.849734  |
| H  | -2.237652 | -1.142142 | 5.893863  |
| C  | -1.254247 | 0.185597  | 4.509257  |
| H  | -0.866252 | 0.839670  | 5.285313  |
| C  | -0.977170 | 0.463695  | 3.170140  |
| H  | -0.387831 | 1.342273  | 2.921574  |
| Cl | -0.776612 | -3.778129 | -2.368879 |
| Cl | -3.347759 | -2.043278 | -1.097531 |
| N  | 1.044935  | -1.735222 | -0.520584 |
| O  | 0.160609  | 3.898263  | -1.125556 |
| O  | 0.534791  | 3.263989  | 1.010083  |
| O  | 2.961747  | 2.636053  | -1.001657 |
| O  | 2.500194  | 0.863477  | -2.325140 |
| P  | -1.161554 | -0.077451 | 0.380717  |
| Pd | -1.032408 | -1.908945 | -0.942597 |

#### Complex 10

|    |           |           |           |
|----|-----------|-----------|-----------|
| Pt | -1.194929 | -1.605089 | -0.711959 |
| C  | 0.836635  | 0.625626  | 0.318597  |
| C  | 1.543005  | -0.709921 | 0.195058  |
| C  | 2.886350  | -0.865475 | 0.664344  |
| C  | 3.618802  | 0.178784  | 1.301822  |
| C  | 4.904829  | -0.037317 | 1.745380  |
| C  | 5.528568  | -1.297102 | 1.574579  |
| C  | 4.851769  | -2.324206 | 0.958389  |
| C  | 3.525144  | -2.134594 | 0.492199  |
| C  | 2.791132  | -3.160545 | -0.146690 |
| C  | 1.502639  | -2.938771 | -0.546198 |
| C  | 1.101628  | 1.615503  | -0.863237 |
| C  | 2.452991  | 1.393744  | -1.558098 |
| C  | 4.676274  | 2.149356  | -1.775558 |



|    |           |           |           |
|----|-----------|-----------|-----------|
| C  | 0.981446  | 3.053331  | -0.351961 |
| C  | 0.649450  | 5.288462  | -1.008827 |
| C  | -1.944658 | 1.752080  | -0.053981 |
| C  | -2.367520 | 1.804900  | -1.393249 |
| C  | -3.071546 | 2.913524  | -1.863681 |
| C  | -3.375755 | 3.968557  | -1.001880 |
| C  | -2.975842 | 3.913674  | 0.335650  |
| C  | -2.264345 | 2.811408  | 0.810546  |
| C  | -1.279460 | 0.122507  | 2.310560  |
| C  | -0.645140 | 0.964938  | 3.240524  |
| C  | -0.888633 | 0.807587  | 4.605587  |
| C  | -1.765053 | -0.184321 | 5.052122  |
| C  | -2.401156 | -1.019682 | 4.132100  |
| C  | -2.160321 | -0.872442 | 2.765181  |
| Cl | -1.252105 | -3.576622 | -2.066671 |
| Cl | -3.526907 | -1.448329 | -0.875145 |
| N  | 0.875502  | -1.732965 | -0.360125 |
| O  | 2.657091  | 0.511478  | -2.357982 |
| O  | 3.376865  | 2.292924  | -1.168656 |
| O  | 1.087973  | 3.387427  | 0.811066  |
| O  | 0.758042  | 3.896862  | -1.365158 |
| P  | -1.015956 | 0.273659  | 0.504805  |
| H  | 1.181271  | 1.130543  | 1.219970  |
| H  | 3.176510  | 1.159300  | 1.432655  |
| H  | 5.445658  | 0.767327  | 2.235066  |
| H  | 6.542951  | -1.448461 | 1.932540  |
| H  | 5.319415  | -3.295153 | 0.819910  |
| H  | 3.241438  | -4.134078 | -0.314195 |
| H  | 0.896552  | -3.692530 | -1.033210 |
| H  | 0.366315  | 1.461253  | -1.657280 |
| H  | 5.132906  | 1.207738  | -1.461329 |
| H  | 5.258272  | 2.998427  | -1.417467 |
| H  | 4.590365  | 2.166738  | -2.864173 |
| H  | -0.202342 | 5.436519  | -0.341228 |
| H  | 0.497775  | 5.816520  | -1.949877 |
| H  | 1.564420  | 5.626856  | -0.516556 |
| H  | -2.175842 | 0.963883  | -2.051883 |
| H  | -3.399432 | 2.939189  | -2.898795 |
| H  | -3.937264 | 4.824644  | -1.366431 |
| H  | -3.226830 | 4.723310  | 1.015585  |
| H  | -1.970672 | 2.777321  | 1.853856  |
| H  | 0.028808  | 1.750361  | 2.907915  |
| H  | -0.393230 | 1.460593  | 5.318891  |
| H  | -1.950108 | -0.305643 | 6.115995  |
| H  | -3.083223 | -1.792359 | 4.475197  |
| H  | -2.652357 | -1.522462 | 2.047479  |

## Complex 18

|   |           |           |           |
|---|-----------|-----------|-----------|
| C | -3.129586 | 1.312792  | -1.234563 |
| C | -3.218977 | 2.512869  | -1.994133 |
| H | -2.450040 | 2.742057  | -2.722546 |
| C | -4.265209 | 3.385820  | -1.815064 |
| H | -4.320358 | 4.299037  | -2.404305 |
| C | -5.296796 | 3.113625  | -0.879816 |
| C | -6.396959 | 3.996404  | -0.718073 |
| H | -6.425456 | 4.901620  | -1.320487 |
| C | -7.410392 | 3.717376  | 0.170804  |
| H | -8.249281 | 4.399230  | 0.281330  |
| C | -7.357951 | 2.530307  | 0.937031  |
| H | -8.162681 | 2.300721  | 1.630995  |
| C | -6.298490 | 1.655739  | 0.809711  |
| H | -6.285000 | 0.761632  | 1.422505  |
| C | -5.228046 | 1.913607  | -0.095645 |
| C | -4.108556 | 1.029070  | -0.280774 |
| C | -3.991097 | -0.253406 | 0.519962  |
| H | -4.968607 | -0.680486 | 0.746965  |
| C | -3.222972 | -0.150481 | 1.875179  |
| H | -2.144756 | -0.200152 | 1.703709  |
| C | -3.425552 | 1.188958  | 2.590410  |
| C | -4.815423 | 2.406185  | 4.057579  |
| H | -3.954508 | 2.745408  | 4.638345  |
| H | -5.659282 | 2.181598  | 4.710027  |
| H | -5.089213 | 3.168705  | 3.324691  |
| C | -3.622891 | -1.305601 | 2.796506  |
| C | -3.001797 | -2.502966 | 4.726118  |
| H | -3.976508 | -2.364797 | 5.201015  |
| H | -2.201382 | -2.450040 | 5.464129  |
| H | -2.983118 | -3.463382 | 4.205509  |
| C | -2.287140 | -2.777271 | 0.261791  |
| C | -0.990513 | -2.572888 | 0.763297  |
| H | -0.468762 | -1.644449 | 0.553535  |
| C | -0.342256 | -3.568553 | 1.495098  |
| H | 0.660246  | -3.383612 | 1.868754  |
| C | -0.980860 | -4.790682 | 1.715311  |
| H | -0.474607 | -5.575588 | 2.271422  |
| C | -2.263035 | -5.012417 | 1.205374  |
| H | -2.757405 | -5.967102 | 1.364637  |
| C | -2.916020 | -4.013125 | 0.483405  |
| H | -3.910219 | -4.201100 | 0.093408  |
| C | -4.403208 | -2.156653 | -1.690521 |
| C | -4.194037 | -2.287612 | -3.072056 |
| H | -3.267750 | -1.928652 | -3.511911 |
| C | -5.173781 | -2.868514 | -3.878753 |
| H | -5.003206 | -2.962051 | -4.947572 |
| C | -6.369352 | -3.318243 | -3.315705 |
| H | -7.133670 | -3.764991 | -3.945851 |

|   |           |           |           |
|---|-----------|-----------|-----------|
| C | -6.584936 | -3.190180 | -1.941571 |
| H | -7.514820 | -3.537656 | -1.499735 |
| C | -5.608128 | -2.613087 | -1.129117 |
| H | -5.784226 | -2.528524 | -0.060224 |
| C | 3.129866  | -1.312483 | -1.234676 |
| C | 3.219398  | -2.512318 | -1.994594 |
| H | 2.450584  | -2.741303 | -2.723199 |
| C | 4.265628  | -3.385298 | -1.815635 |
| H | 4.320878  | -4.298339 | -2.405139 |
| C | 5.297076  | -3.113349 | -0.880171 |
| C | 6.397238  | -3.996155 | -0.718543 |
| H | 6.425826  | -4.901197 | -1.321214 |
| C | 7.410556  | -3.717362 | 0.170533  |
| H | 8.249444  | -4.399232 | 0.280970  |
| C | 7.358000  | -2.530512 | 0.937092  |
| H | 8.162644  | -2.301110 | 1.631216  |
| C | 6.298535  | -1.655932 | 0.809898  |
| H | 6.284955  | -0.762006 | 1.422953  |
| C | 5.228197  | -1.913555 | -0.095659 |
| C | 4.108696  | -1.029003 | -0.280663 |
| C | 3.991035  | 0.253243  | 0.520433  |
| H | 4.968472  | 0.680244  | 0.747895  |
| C | 3.222439  | 0.149837  | 1.875341  |
| H | 2.144278  | 0.199209  | 1.703444  |
| C | 3.425163  | -1.189685 | 2.590398  |
| O | 4.511426  | -1.170463 | 3.385957  |
| C | 3.621675  | 1.304821  | 2.797140  |
| C | 2.999518  | 2.501463  | 4.726864  |
| H | 3.973760  | 2.363082  | 5.202671  |
| H | 2.198415  | 2.448582  | 5.464131  |
| H | 2.981491  | 3.461926  | 4.206335  |
| C | 4.403744  | 2.156994  | -1.689563 |
| C | 4.194849  | 2.288134  | -3.071130 |
| H | 3.268668  | 1.929194  | -3.511220 |
| C | 5.174737  | 2.869173  | -3.877550 |
| H | 5.004379  | 2.962850  | -4.946391 |
| C | 6.370185  | 3.318853  | -3.314197 |
| H | 7.134618  | 3.765717  | -3.944121 |
| C | 6.585496  | 3.190596  | -1.940040 |
| H | 7.515286  | 3.538026  | -1.497970 |
| C | 5.608541  | 2.613367  | -1.127860 |
| H | 5.784447  | 2.528636  | -0.058949 |
| C | 2.287214  | 2.777333  | 0.262356  |
| C | 0.990495  | 2.572870  | 0.763573  |
| H | 0.468796  | 1.644451  | 0.553618  |
| C | 0.342068  | 3.568460  | 1.495335  |
| H | -0.660503 | 3.383455  | 1.868777  |
| C | 0.980594  | 4.790585  | 1.715779  |
| H | 0.474204  | 5.575431  | 2.271852  |
| C | 2.262864  | 5.012401  | 1.206110  |

|    |           |           |           |
|----|-----------|-----------|-----------|
| H  | 2.757181  | 5.967082  | 1.365555  |
| C  | 2.916017  | 4.013185  | 0.484189  |
| H  | 3.910285  | 4.201225  | 0.094402  |
| Cl | -0.024050 | 1.655254  | -2.519373 |
| Cl | 0.024442  | -1.654719 | -2.519666 |
| O  | -4.511774 | 1.169764  | 3.386025  |
| O  | -2.697577 | 2.147203  | 2.463925  |
| O  | -2.738211 | -1.434725 | 3.798546  |
| O  | -4.601621 | -2.008265 | 2.657743  |
| O  | 2.736644  | 1.433331  | 3.798955  |
| O  | 4.600186  | 2.007885  | 2.658893  |
| P  | -3.083382 | -1.406493 | -0.667180 |
| P  | 3.083677  | 1.406681  | -0.666669 |
| Pd | -1.670651 | 0.003408  | -1.715137 |
| Pd | 1.670988  | -0.002976 | -1.715071 |
| O  | 2.697269  | -2.147994 | 2.463837  |
| C  | 4.815239  | -2.406919 | 4.057385  |
| H  | 5.659093  | -2.182294 | 4.709827  |
| H  | 3.954378  | -2.746285 | 4.638144  |
| H  | 5.089090  | -3.169326 | 3.324408  |

## 8. Crystallographic data

### Crystallographic data of complex (R)-9

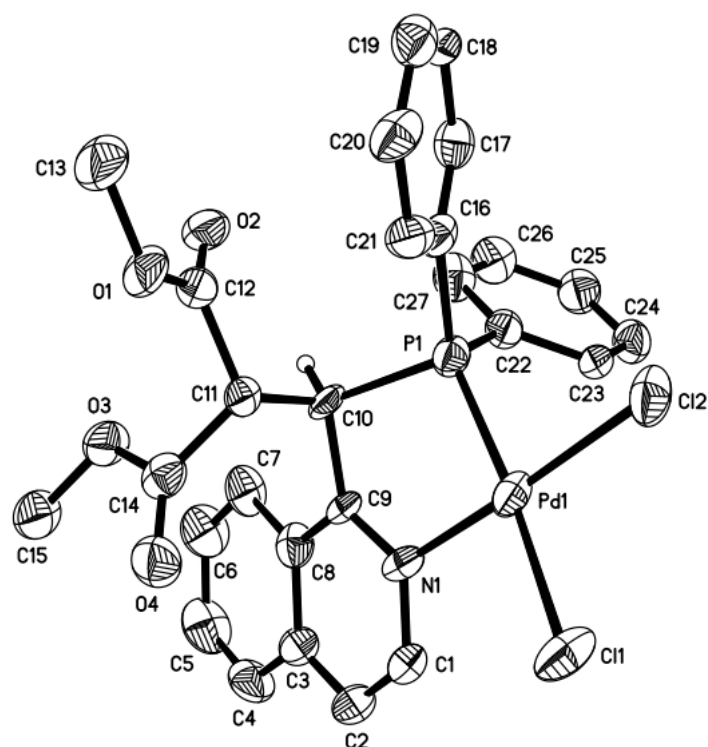

Figure 5 Structure of complex (R)-9 with the thermal ellipsoids

Table S4. Crystal Data of (R)-9 palladium complex

| Crystal data         |                                                              |                     |
|----------------------|--------------------------------------------------------------|---------------------|
| Identification code  | CCDC 1968108                                                 |                     |
| Chemical formula     | $\text{C}_{27}\text{H}_{24}\text{Cl}_2\text{NO}_4\text{PPd}$ |                     |
| Formula weight       | 634.74 g/mol                                                 |                     |
| Temperature          | 100(2) K                                                     |                     |
| Wavelength           | 0.71073 Å                                                    |                     |
| Crystal size         | 0.060 x 0.100 x 0.220 mm                                     |                     |
| Crystal habit        | yellow block                                                 |                     |
| Crystal system       | orthorhombic                                                 |                     |
| Space group          | P 21 21 21                                                   |                     |
| Unit cell dimensions | $a = 10.1645(14)$ Å                                          | $\alpha = 90^\circ$ |
|                      | $b = 14.880(2)$ Å                                            | $\beta = 90^\circ$  |
|                      | $c = 17.932(3)$ Å                                            | $\gamma = 90^\circ$ |
| Volume               | $2712.2(7)$ Å <sup>3</sup>                                   |                     |

|                               |                         |
|-------------------------------|-------------------------|
| <b>Z</b>                      | 4                       |
| <b>Density (calculated)</b>   | 1.555 g/cm <sup>3</sup> |
| <b>Absorption coefficient</b> | 0.974 mm <sup>-1</sup>  |
| <b>F(000)</b>                 | 1280                    |

#### Data collection

|                                            |                             |
|--------------------------------------------|-----------------------------|
| <b>Theta range for data collection</b>     | 2.27 to 26.42°              |
| <b>Index ranges</b>                        | -12≤h≤9, -18≤k≤18, -22≤l≤22 |
| <b>Reflections collected</b>               | 16735                       |
| <b>Independent reflections</b>             | 5536 [R(int) = 0.0933]      |
| <b>Coverage of independent reflections</b> | 99.7%                       |
| <b>Absorption correction</b>               | Multi-Scan                  |
| <b>Max. and min. transmission</b>          | 0.9440 and 0.8140           |
| <b>Structure solution technique</b>        | direct methods              |
| <b>Structure solution program</b>          | XT, VERSION 2014/5          |

#### Refinement

|                                         |                                                                                                                                                       |
|-----------------------------------------|-------------------------------------------------------------------------------------------------------------------------------------------------------|
| <b>Refinement method</b>                | Full-matrix least-squares on F <sup>2</sup>                                                                                                           |
| <b>Refinement program</b>               | SHELXL-2016/6 (Sheldrick, 2016)                                                                                                                       |
| <b>Function minimized</b>               | $\sum w(F_o^2 - F_c^2)^2$                                                                                                                             |
| <b>Data / restraints / parameters</b>   | 5536 / 0 / 327                                                                                                                                        |
| <b>Goodness-of-fit on F<sup>2</sup></b> | 1.020                                                                                                                                                 |
| <b>Final R indices</b>                  | 3717 data; R1 = 0.0566, wR2 = 0.1094<br>I>2σ(I)                                                                                                       |
|                                         | all data R1 = 0.1028, wR2 = 0.1307                                                                                                                    |
| <b>Weighting scheme</b>                 | w=1/[σ <sup>2</sup> (F <sub>o</sub> <sup>2</sup> )+(0.0484P) <sup>2</sup> ]<br>where P=(F <sub>o</sub> <sup>2</sup> +2F <sub>c</sub> <sup>2</sup> )/3 |
| <b>Absolute structure parameter</b>     | 0.03(4)                                                                                                                                               |
| <b>Largest diff. peak and hole</b>      | 0.864 and -0.582 eÅ <sup>-3</sup>                                                                                                                     |
| <b>R.M.S. deviation from mean</b>       | 0.119 eÅ <sup>-3</sup>                                                                                                                                |

## Crystallographic data of complex 10

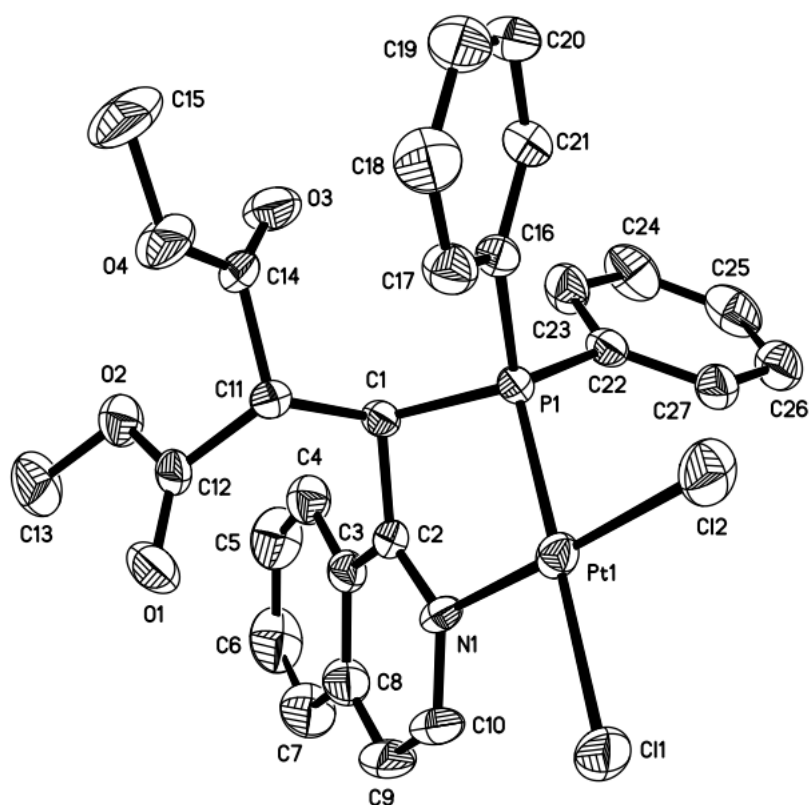

Figure 6 Structure of complex 10 with the thermal ellipsoids

Table S5. Crystal Data of 10 platinum complex

| Crystal data           |                            |                             |
|------------------------|----------------------------|-----------------------------|
| Identification code    | CCDC 1968110               |                             |
| Chemical formula       | $C_{27}H_{24}Cl_2NO_4PPt$  |                             |
| Formula weight         | 723.43 g/mol               |                             |
| Temperature            | 250(2) K                   |                             |
| Wavelength             | 0.71073 Å                  |                             |
| Crystal size           | 0.040 x 0.060 x 0.100 mm   |                             |
| Crystal habit          | yellow plate               |                             |
| Crystal system         | triclinic                  |                             |
| Space group            | P -1                       |                             |
| Unit cell dimensions   | $a = 11.0515(12)$ Å        | $\alpha = 116.404(3)^\circ$ |
|                        | $b = 11.2817(12)$ Å        | $\beta = 96.725(3)^\circ$   |
|                        | $c = 11.9017(12)$ Å        | $\gamma = 93.542(3)^\circ$  |
| Volume                 | $1309.1(2)$ Å <sup>3</sup> |                             |
| Z                      | 2                          |                             |
| Density (calculated)   | $1.835$ g/cm <sup>3</sup>  |                             |
| Absorption coefficient | $5.659$ mm <sup>-1</sup>   |                             |

F(000)

704

**Data collection**

|                                            |                              |
|--------------------------------------------|------------------------------|
| <b>Theta range for data collection</b>     | 2.76 to 30.55°               |
| <b>Index ranges</b>                        | -15≤h≤15, -16≤k≤16, -16≤l≤17 |
| <b>Reflections collected</b>               | 19663                        |
| <b>Independent reflections</b>             | 7915 [R(int) = 0.0489]       |
| <b>Coverage of independent reflections</b> | 98.7%                        |
| <b>Absorption correction</b>               | Multi-Scan                   |
| <b>Max. and min. transmission</b>          | 0.8050 and 0.6010            |
| <b>Structure solution technique</b>        | direct methods               |
| <b>Structure solution program</b>          | XT, VERSION 2014/5           |

**Refinement**

|                                          |                                                                           |
|------------------------------------------|---------------------------------------------------------------------------|
| <b>Refinement method</b>                 | Full-matrix least-squares on F <sup>2</sup>                               |
| <b>Refinement program</b>                | SHELXL-2016/6 (Sheldrick, 2016)                                           |
| <b>Function minimized</b>                | $\Sigma w(F_o^2 - F_c^2)^2$                                               |
| <b>Data / restraints / parameters</b>    | 7915 / 0 / 327                                                            |
| <b>Goodness-of-fit on F<sup>2</sup></b>  | 1.040                                                                     |
| <b><math>\Delta/\sigma_{\max}</math></b> | 0.001                                                                     |
| <b>Final R indices</b>                   | 6611 data; R1 = 0.0369, wR2 = 0.0875<br>I>2σ(I)                           |
|                                          | all data R1 = 0.0505, wR2 = 0.0953                                        |
| <b>Weighting scheme</b>                  | $w=1/[\sigma^2(F_o^2)+(0.0470P)^2+0.2195P]$<br>where $P=(F_o^2+2F_c^2)/3$ |
| <b>Largest diff. peak and hole</b>       | 1.747 and -1.975 eÅ <sup>-3</sup>                                         |
| <b>R.M.S. deviation from mean</b>        | 0.161 eÅ <sup>-3</sup>                                                    |



## Crystallographic data of complex (R,R)-22

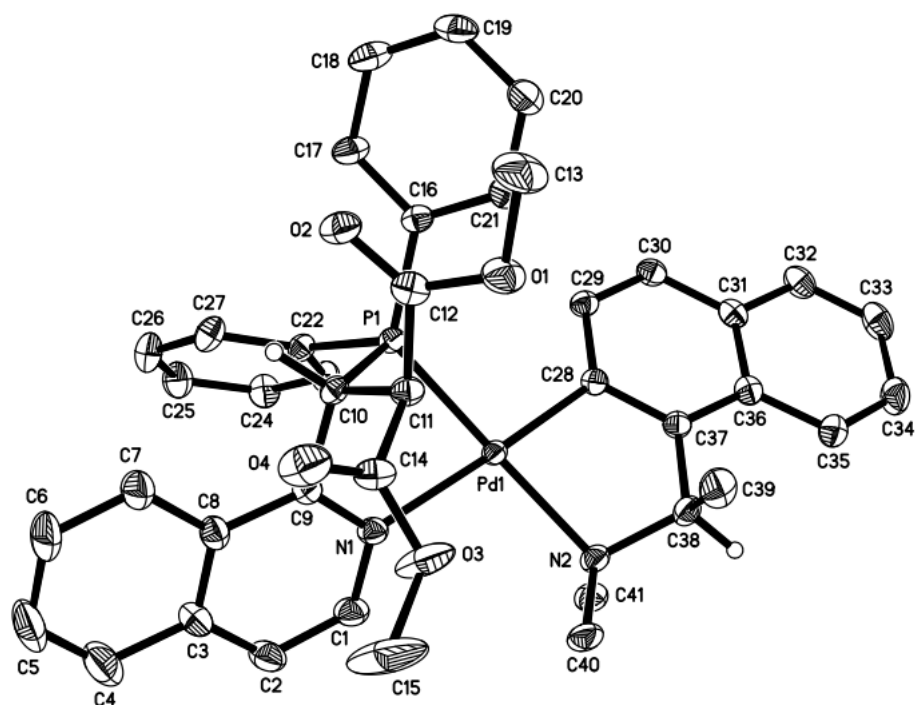

Figure 7 Structure of complex (R,R)-22 with the thermal ellipsoids

Table S6. Crystal Data of (R,R)-22 platinum complex

### Crystal data

|                        |                                             |                     |
|------------------------|---------------------------------------------|---------------------|
| Identification code    | CCDC 1968111                                |                     |
| Chemical formula       | $C_{44.40}H_{48.40}Cl_{1.40}N_2O_{8.80}PPd$ |                     |
| Formula weight         | 937.85 g/mol                                |                     |
| Temperature            | 100(2) K                                    |                     |
| Wavelength             | 0.71073 Å                                   |                     |
| Crystal size           | 0.100 x 0.220 x 0.240 mm                    |                     |
| Crystal habit          | yellow block                                |                     |
| Crystal system         | orthorhombic                                |                     |
| Space group            | P 21 21 21                                  |                     |
| Unit cell dimensions   | $a = 10.0501(2)$ Å                          | $\alpha = 90^\circ$ |
|                        | $b = 11.1476(3)$ Å                          | $\beta = 90^\circ$  |
|                        | $c = 38.2901(11)$ Å                         | $\gamma = 90^\circ$ |
| Volume                 | $4289.81(19)$ Å <sup>3</sup>                |                     |
| Z                      | 4                                           |                     |
| Density (calculated)   | $1.452$ g/cm <sup>3</sup>                   |                     |
| Absorption coefficient | $0.614$ mm <sup>-1</sup>                    |                     |

**F(000)** 1936

## Data collection

**Theta range for data collection** 2.43 to 34.97°  
**Index ranges** -16 ≤ h ≤ 9, -17 ≤ k ≤ 17, -61 ≤ l ≤ 40  
**Reflections collected** 55340  
**Independent reflections** 18695 [R(int) = 0.0557]  
**Coverage of independent reflections** 99.6%  
**Absorption correction** Multi-Scan  
**Max. and min. transmission** 0.9410 and 0.8670  
**Structure solution technique** direct methods  
**Structure solution program** XT, VERSION 2014/5

## Refinement

**Refinement method** Full-matrix least-squares on F<sup>2</sup>  
**Refinement program** SHELXL-2016/6 (Sheldrick, 2016)  
**Function minimized**  $\sum w(F_o^2 - F_c^2)^2$   
**Data / restraints / parameters** 18695 / 317 / 613  
**Goodness-of-fit on F<sup>2</sup>** 1.029  
 **$\Delta/\sigma_{\max}$**  0.003  
**Final R indices** 15734 data; I > 2σ(I) R1 = 0.0419, wR2 = 0.0749  
all data R1 = 0.0581, wR2 = 0.0825  
**Weighting scheme**  $w = 1/[\sigma^2(F_o^2) + (0.0239P)^2 + 0.6303P]$   
where  $P = (F_o^2 + 2F_c^2)/3$   
**Absolute structure parameter** 0.007(9)  
**Largest diff. peak and hole** 0.691 and -0.888 eÅ<sup>-3</sup>  
**R.M.S. deviation from mean** 0.090 eÅ<sup>-3</sup>
